# Supplementary material
Source: PubMed Central journal article supplement (PMC4304668)
Supplement: NIHMS353590-supplement-SOM_Appendix_1.pdf [file NIHMS353590-supplement-SOM_Appendix_1.pdf]

## **Predictive modeling analysis of genomic regions associated with tumor phenotype in canine non-Hodgkin lymphoma**

Predictive modeling analysis using multiple regression analysis was performed for the two genomic regions whose copy number status was associated most significantly with tumor phenotype in canine non-Hodgkins lymphoma (cNHL). For both regions, a contingency table was generated to indicate the copy number status at that locus for all known B-cell lymphoma (BCL) cases (kBCL) and all known T-cell lymphoma (TCL) cases (kTCL). Regression analysis was then performed to model the ability of each locus, in isolation, to classify tumor phenotype accurately, where pBCL indicates 'predicted BCL' and pTCL indicates 'predicted TCL'.

Summary measures of the predictive performance for both models are shown. The results show a decision matrix indicating the number of cases that were classified as pBCL or pTCL using the regression model, compared to the known phenotype status (kBCL or kTCL). Also shown are measures of classification accuracy and sensitivity and specificity, which, respectively, summarize true positive and true negative classification accuracies for each contrast. Multivariate analysis was then performed to determine the predictive ability of both models when used in combination.

## Model A

| Clone ID    | P-value  | Dog chromosome location | Human chromosome location | Association |
|-------------|----------|-------------------------|---------------------------|-------------|
| CH82-325C12 | 2.90E-15 | chr11:44256300-44428212 | chr9:21971498-22175227    | ↑ loss in T |

### Contingency table:

| phenotype | LOSS | NORMAL | GAIN | Total |
|-----------|------|--------|------|-------|
| BCL       | 0    | 109    | 4    | 113   |
| TCL       | 20   | 16     | 1    | 37    |
| Total     | 20   | 125    | 5    | 150   |

### Regression analysis:

| Source   | SS         | df  | MS         | Number of obs =        | 150           |
|----------|------------|-----|------------|------------------------|---------------|
| Model    | 9.9612766  | 1   | 9.9612766  | F( 1, 148) =           | 82.31         |
| Residual | 17.9120567 | 148 | .12102741  | Prob > F =             | 0.0000        |
| Total    | 27.8733333 | 149 | .187069351 | R-squared =            | 0.3574        |
|          |            |     |            | <b>Adj R-squared =</b> | <b>0.3530</b> |
|          |            |     |            | Root MSE =             | .34789        |

| phenotypei~r | Coef.    | Std. Err. | t     | P> t  | [95% Conf. Interval] |
|--------------|----------|-----------|-------|-------|----------------------|
| ch82325c12~2 | .6510638 | .0717642  | 9.07  | 0.000 | .509249 .7928787     |
| _cons        | .8184397 | .0292976  | 27.94 | 0.000 | .760544 .8763354     |

### Decision matrix:

| Classified | BCL | TCL | Total |
|------------|-----|-----|-------|
| not LOSS   | 113 | 17  | 130   |
| LOSS       | 0   | 20  | 20    |
| Total      | 113 | 37  | 150   |

### Summary of predictive performance

pTCL if predicted Pr(kTCL) >= .5

|                              |                         |              |
|------------------------------|-------------------------|--------------|
| <b>Sensitivity</b>           | <b>Pr (pTCL   kTCL)</b> | <b>54.1%</b> |
| <b>Specificity</b>           | <b>Pr (pBCL   kBCL)</b> | <b>100%</b>  |
| Positive predictive value    | Pr (kTCL   pTCL)        | 100%         |
| Negative predictive value    | Pr (kBCL   pBCL)        | 86.9%        |
| False positive rate for kTCL | Pr (pBCL   kTCL)        | 46%          |
| False negative rate for kBCL | Pr (pTCL   kBCL)        | 0%           |
| False positive rate for pBCL | Pr (kTCL   pBCL)        | 13.1%        |
| False negative rate for pTCL | Pr (kBCL   pTCL)        | 0%           |
| <b>Overall accuracy</b>      |                         | <b>88.7%</b> |

### Outcome:

Model A indicates that the copy number status of the genomic region encompassed by clone CH82-325C12 (CFA 11; 44.3Mb) explains 35.3% of the variation in tumor phenotype within the cohort (adjusted R-squared value = 0.3530). **This model predicts TCL with 54.1% accuracy (sensitivity), and predicts BCL with 100% accuracy (specificity), with an overall accuracy of 88.7%.**

## Model B

| Clone ID    | P-value  | Dog chromosome location | Human chromosome location | Association |
|-------------|----------|-------------------------|---------------------------|-------------|
| CH82-518M17 | 2.59E-14 | chr26:30333217-30501573 | chr22:23040362-23163490   | ↑ loss in B |

### Contingency table:

| phenotype | LOSS | NORMAL | GAIN | Total |
|-----------|------|--------|------|-------|
| BCL       | 74   | 32     | 7    | 113   |
| TCL       | 0    | 32     | 5    | 37    |
| Total     | 74   | 64     | 12   | 150   |

### Regression analysis:

| Source   | SS         | df  | MS         | Number of obs =        | 150           |
|----------|------------|-----|------------|------------------------|---------------|
| Model    | 6.82121319 | 1   | 6.82121319 | F( 1, 148) =           | 47.95         |
| Residual | 21.0521201 | 148 | .142244055 | Prob > F =             | 0.0000        |
|          |            |     |            | R-squared =            | 0.2447        |
|          |            |     |            | <b>Adj R-squared =</b> | <b>0.2396</b> |
| Total    | 27.8733333 | 149 | .187069351 | Root MSE =             | .37715        |

| phenotypei~r | Coef.     | Std. Err. | t     | P> t  | [95% Conf. Interval] |
|--------------|-----------|-----------|-------|-------|----------------------|
| ch82518m17   | -.3361307 | .0485394  | -6.92 | 0.000 | -.4320506 -.2402109  |
| _cons        | .6143993  | .0367534  | 16.72 | 0.000 | .54177 .6870286      |

### Decision matrix:

| Classified | BCL | TCL | Total |
|------------|-----|-----|-------|
| not LOSS   | 106 | 32  | 138   |
| LOSS       | 7   | 5   | 12    |
| Total      | 113 | 37  | 150   |

### Summary of predictive performance

pBCL if predicted Pr(kBCL) >= .5

|                              |                       |              |
|------------------------------|-----------------------|--------------|
| <b>Sensitivity</b>           | <b>Pr (pBCL kBCL)</b> | <b>93.8%</b> |
| <b>Specificity</b>           | <b>Pr (pTCL kTCL)</b> | <b>13.5%</b> |
| Positive predictive value    | Pr (kBCL pBCL)        | 76.8%        |
| Negative predictive value    | Pr (kTCL pTCL)        | 41.7%        |
| False positive rate for kTCL | Pr (pBCL kTCL)        | 86.5%        |
| False negative rate for kBCL | Pr (pTCL kBCL)        | 6.2%         |
| False positive rate for pBCL | Pr (kTCL pBCL)        | 23.2%        |
| False negative rate for pTCL | Pr (kBCL pTCL)        | 58.3%        |
| <b>Overall accuracy</b>      |                       | <b>74%</b>   |

### Outcome:

Model B indicates that the copy number status of the genomic region encompassed by clone CH82-518M17 (CFA 26; 30.4Mb) explains 24% of the variation in tumor phenotype within the cohort (adjusted R-squared value = 0.2396). **This model predicts BCL with 93.8% accuracy (sensitivity), and predicts TCL with 13.5% accuracy (specificity), with an overall accuracy of 74%.**

## Multivariate analysis of models A and B

| Clone ID    | P-value  | Dog chromosome location | Human chromosome location | Association |
|-------------|----------|-------------------------|---------------------------|-------------|
| CH82-325C12 | 2.90E-15 | chr11:44256300-44428212 | chr9:21971498-22175227    | ↑ loss in T |
| CH82-518M17 | 2.59E-14 | chr26:30333217-30501573 | chr22:23040362-23163490   | ↑ loss in B |

### Regression analysis:

```

Logistic regression
Log likelihood = -46.535779
Number of obs      =      150
LR chi2(2)         =      74.52
Prob > chi2        =      0.0000
Pseudo R-squared   =      0.4447
  
```

```

-----
phenotypei~r | Odds Ratio   Std. Err.      z    P>|z|    [95% Conf. Interval]
-----+-----
ch82325c12~2 |   64.15195   68.36178    3.90  0.000    7.946029   517.9282
ch82518m17 |    .1853011   .0810088   -3.86  0.000    .0786602   .4365167
-----+-----
  
```

### Decision matrix:

Logistic model for phenotypeindicator

```

----- True -----
Classified |      BCL      TCL |      Total
-----+-----
not LOSS   |      106      15 |      121
LOSS       |       7      22 |       29
-----+-----
Total      |      113      37 |      150
  
```

### Summary of predictive performance:

pBCL if predicted Pr(kBCL) >= .5

```

-----
Sensitivity           Pr (pBCL | kBCL)   93.8%
Specificity          Pr (pTCL | kTCL)   59.5%
Positive predictive value Pr (kBCL | pBCL)   87.6%
Negative predictive value Pr (kTCL | pTCL)   75.9%
-----
False positive rate for kTCL Pr (pBCL | kTCL)   40.5%
False negative rate for kBCL Pr (pTCL | kBCL)    6.2%
False positive rate for pBCL Pr (kTCL | pBCL)   12.4%
False negative rate for pTCL Pr (kBCL | pTCL)   24.1%
-----
Correctly classified           85.3%
-----
  
```

### Outcome:

The results of the multivariate analysis indicate that, when evaluated in combination, the copy number status of the genomic regions encompassed by clones CH82-325C12 (CFA 11; 44.3Mb) and CH82-518M17 (CFA 26; 30.4Mb) explains 44.5% of the variation in tumor phenotype within the cohort (pseudo R-squared value = 0.4447). **This combined model predicts BCL with 93.8% accuracy and predicts TCL with 59.5% accuracy, with an overall accuracy of 85.3%.**
