# Supplementary material
Source: PubMed Central journal article supplement (PMC4304668)
Supplement: NIHMS353590-supplement-SOM_Table_IIa.pdf [file NIHMS353590-supplement-SOM_Table_IIa.pdf]

| Clone ID        | Dog chromosome location             | # scored | % loss | % gain | Human chromosome location | Gene Symbol         | Gene Description                                                                        | Human cytogenetic assignment (Entrez) |       |       |                          |               |                                                      |                          |
|-----------------|-------------------------------------|----------|--------|--------|---------------------------|---------------------|-----------------------------------------------------------------------------------------|---------------------------------------|-------|-------|--------------------------|---------------|------------------------------------------------------|--------------------------|
| CH82-335H19     | chr1:21035971-21232172              | 110      | 0.9%   | 36.4%  | chr18:55393674-55640478   | <i>ATP8B1</i>       | ATPase, class I, type 8B, member 1                                                      | 18q21-q22 18q21.31                    |       |       |                          |               |                                                      |                          |
|                 |                                     |          |        |        |                           | <i>PTCHD2</i>       | patched domain containing 2                                                             | 1p36.22                               |       |       |                          |               |                                                      |                          |
|                 |                                     |          |        |        |                           | <i>FBXO2</i>        | F-box protein 2                                                                         | 1p36.22                               |       |       |                          |               |                                                      |                          |
|                 |                                     |          |        |        |                           | <i>FBXO44</i>       | F-box protein 44                                                                        | 1p36.22                               |       |       |                          |               |                                                      |                          |
|                 |                                     |          |        |        |                           | <i>FBXO6</i>        | F-box protein 6                                                                         | 1p36.22                               |       |       |                          |               |                                                      |                          |
|                 |                                     |          |        |        |                           | <i>MAD2L2</i>       | MAD2 mitotic arrest deficient-like 2 (yeast)                                            | 1p36                                  |       |       |                          |               |                                                      |                          |
|                 |                                     |          |        |        |                           | <i>C1orf187</i>     | chromosome 1 open reading frame 187                                                     | 1p36.22                               |       |       |                          |               |                                                      |                          |
|                 |                                     |          |        |        |                           | <i>AGTRAP</i>       | angiotensin II receptor-associated protein                                              | 1p36.22                               |       |       |                          |               |                                                      |                          |
|                 |                                     |          |        |        |                           | <i>MTHFR</i>        | 5,10-methylenetetrahydrofolate reductase (NADPH)                                        | 1p36.3                                |       |       |                          |               |                                                      |                          |
|                 |                                     |          |        |        |                           | <i>CLCN6</i>        | chloride channel 6                                                                      | 1p36                                  |       |       |                          |               |                                                      |                          |
| CH82-349L24     | chr2:87326057-87550438              | 103      | 4.9%   | 23.3%  | chr11:11573472-11867777   | <i>CAST</i>         | calpastatin                                                                             | 5q15                                  |       |       |                          |               |                                                      |                          |
| CH82-335M12     | chr3:15867689-16066967              | 110      | 24.5%  | 10.0%  | chr5:95812200-96050078    | <i>FAM189A1</i>     | family with sequence similarity 189, member A1                                          | 15q13.1                               |       |       |                          |               |                                                      |                          |
| CH82-126L20     | chr3:41442419-41673900              | 108      | 19.4%  | 27.8%  | chr15:29572544-29812637   | <i>HS3ST6</i>       | heparan sulfate (glucosamine) 3-O-sulfotransferase 6                                    | 16p13.3                               |       |       |                          |               |                                                      |                          |
| CH82-307I06     |                                     |          |        |        |                           | <i>SEPX1</i>        | selenoprotein X, 1                                                                      | 16p13.3                               |       |       |                          |               |                                                      |                          |
|                 |                                     |          |        |        |                           | <i>RPL3L</i>        | ribosomal protein L3-like                                                               | 16p13.3                               |       |       |                          |               |                                                      |                          |
|                 |                                     |          |        |        |                           | <i>NDUFB10</i>      | NADH dehydrogenase (ubiquinone) 1 beta subcomplex, 10, 22kDa                            | 16p13.3                               |       |       |                          |               |                                                      |                          |
|                 |                                     |          |        |        |                           | <i>RPS2</i>         | ribosomal protein S2                                                                    | 16p13.3                               |       |       |                          |               |                                                      |                          |
|                 |                                     |          |        |        |                           | <i>SNORA10</i>      | small nucleolar RNA, H/ACA box 10                                                       | 16p13.3                               |       |       |                          |               |                                                      |                          |
|                 |                                     |          |        |        |                           | <i>SNORA64</i>      | small nucleolar RNA, H/ACA box 64                                                       | 16p13.3                               |       |       |                          |               |                                                      |                          |
|                 |                                     |          |        |        |                           | <i>SNHG9</i>        | small nucleolar RNA host gene 9 (non-protein coding)                                    | 16p13.3                               |       |       |                          |               |                                                      |                          |
|                 |                                     |          |        |        |                           | <i>SNORA78</i>      | small nucleolar RNA, H/ACA box 78                                                       | 16p13.3                               |       |       |                          |               |                                                      |                          |
|                 |                                     |          |        |        |                           | <i>RNF151</i>       | ring finger protein 151                                                                 | 16p13.3                               |       |       |                          |               |                                                      |                          |
|                 |                                     |          |        |        |                           | <i>TBL3</i>         | transducin (beta)-like 3                                                                | 16p13.3                               |       |       |                          |               |                                                      |                          |
|                 |                                     |          |        |        |                           | <i>NOXO1</i>        | NADPH oxidase organizer 1                                                               | 16p13.3                               |       |       |                          |               |                                                      |                          |
|                 |                                     |          |        |        |                           | <i>GFER</i>         | growth factor, augmenter of liver regeneration                                          | 16p13.3-113.12                        |       |       |                          |               |                                                      |                          |
|                 |                                     |          |        |        |                           | <i>SYNGR3</i>       | synaptotagmin 3                                                                         | 16p13                                 |       |       |                          |               |                                                      |                          |
|                 |                                     |          |        |        |                           | <i>ZNF598</i>       | zinc finger protein 598                                                                 | 16p13.3                               |       |       |                          |               |                                                      |                          |
|                 |                                     |          |        |        |                           | <i>NPW</i>          | neuropeptide W                                                                          | 16p13.3                               |       |       |                          |               |                                                      |                          |
|                 |                                     |          |        |        |                           | <i>SLC9A3R2</i>     | solute carrier family 9 (sodium/hydrogen exchanger), member 3 regulator 2               | 16p13.3                               |       |       |                          |               |                                                      |                          |
|                 |                                     |          |        |        |                           | <i>NTHL1</i>        | nth endonuclease III-like 1 (E. coli)                                                   | 16p13.3                               |       |       |                          |               |                                                      |                          |
|                 |                                     |          |        |        |                           | <i>TS2C2</i>        | tuberous sclerosis 2                                                                    | 16p13.3                               |       |       |                          |               |                                                      |                          |
|                 |                                     |          |        |        |                           | <i>PKD1</i>         | polycystic kidney disease 1 (autosomal dominant)                                        | 16p13.3                               |       |       |                          |               |                                                      |                          |
|                 |                                     |          |        |        |                           | <i>MIR1225</i>      | microRNA 1225                                                                           | 16p13.3                               |       |       |                          |               |                                                      |                          |
|                 |                                     |          |        |        |                           | <i>RAB26</i>        | RAB26, member RAS oncogene family                                                       | 16p13.3                               |       |       |                          |               |                                                      |                          |
|                 |                                     |          |        |        |                           | <i>SNORD60</i>      | small nucleolar RNA, C/D box 60                                                         | 16p13.3                               |       |       |                          |               |                                                      |                          |
|                 |                                     |          |        |        |                           | <i>TRAF7</i>        | TNF receptor-associated factor 7                                                        | 16p13.3                               |       |       |                          |               |                                                      |                          |
|                 |                                     |          |        |        |                           | CH82-390J08         | chr6:41842424-42061613                                                                  | 105                                   | 2.9%  | 23.8% | chr16:1945214-2210305    | <i>LPGAT1</i> | lysophosphatidylglycerol acyltransferase 1           | 1q32                     |
|                 |                                     |          |        |        |                           | CH82-307I06         | chr6:49193261-49385361                                                                  | 107                                   | 26.2% | 15.0% | chr1:105167711-105495138 | <i>INTS7</i>  | integrator complex subunit 7                         | 1p36.13-q42.3            |
|                 |                                     |          |        |        |                           | CH82-126M10         | chr7:13116075-13309044                                                                  | 52                                    | 0.0%  | 34.6% | chr1:211987003-212249063 | <i>DTL</i>    | denticleless homolog (Drosophila)                    | 1q32.1-q32.2             |
|                 |                                     |          |        |        |                           |                     |                                                                                         |                                       |       |       |                          | <i>ADSSL1</i> | adenylsuccinate synthase like 1                      | 14q32.33                 |
|                 |                                     |          |        |        |                           |                     |                                                                                         |                                       |       |       |                          | <i>SIVA1</i>  | SIVA1, apoptosis-inducing factor                     | 14q32.33                 |
|                 |                                     |          |        |        |                           |                     |                                                                                         |                                       |       |       |                          | <b>AKT1</b>   | <b>v-akt murine thymoma viral oncogene homolog 1</b> | <b>14q32.32 14q32.32</b> |
|                 |                                     |          |        |        |                           |                     |                                                                                         |                                       |       |       |                          | <i>ZBTB42</i> | zinc finger and BTB domain containing 42             | 14q32.33                 |
| <i>MGC32770</i> | hypothetical LOC196872              | 14q32.33 |        |        |                           |                     |                                                                                         |                                       |       |       |                          |               |                                                      |                          |
| <i>KIAA0284</i> | KIAA0284                            | 14q32.33 |        |        |                           |                     |                                                                                         |                                       |       |       |                          |               |                                                      |                          |
| <i>PLD4</i>     | phospholipase D family, member 4    | 14q32.33 |        |        |                           |                     |                                                                                         |                                       |       |       |                          |               |                                                      |                          |
| <i>AHNAK2</i>   | AHNAK nucleoprotein 2               | 14q32.33 |        |        |                           |                     |                                                                                         |                                       |       |       |                          |               |                                                      |                          |
| <i>C14orf79</i> | chromosome 14 open reading frame 79 | 14q32.33 |        |        |                           |                     |                                                                                         |                                       |       |       |                          |               |                                                      |                          |
| <i>CDCA4</i>    | cell division cycle associated 4    | 14q32.33 |        |        |                           |                     |                                                                                         |                                       |       |       |                          |               |                                                      |                          |
| <i>GPR132</i>   | G protein-coupled receptor 132      | 14q32.3  |        |        |                           |                     |                                                                                         |                                       |       |       |                          |               |                                                      |                          |
| CH82-182L07     | chr8:75349341-75550584              | 102      | 5.9%   | 26.5%  | chr14:105212288-105550498 | <i>SLC25A10</i>     | solute carrier family 25 (mitochondrial carrier; dicarboxylate transporter), member 10  | 17q25.3                               |       |       |                          |               |                                                      |                          |
| CH82-27N17      | chr8:75997303-76191846              | 103      | 32.0%  | 0.0%   | nd                        | <i>GCGR</i>         | glucagon receptor                                                                       | 17q25                                 |       |       |                          |               |                                                      |                          |
| CH82-186F24     | chr6:77034628-77215538              | 98       | 37.8%  | 6.1%   | nd                        | <i>FAM195B</i>      | family with sequence similarity 195, member B                                           | 17q25.3                               |       |       |                          |               |                                                      |                          |
| CH82-7K11       | chr9:3283814-3479840                | 113      | 2.7%   | 23.0%  | chr17:79678389-79998108   | <i>DYSFIP1</i>      | dysferlin interacting protein 1                                                         | 17q25.3                               |       |       |                          |               |                                                      |                          |
|                 |                                     |          |        |        |                           | <i>P4HB</i>         | prolyl 4-hydroxylase, beta polypeptide                                                  | 17q25                                 |       |       |                          |               |                                                      |                          |
|                 |                                     |          |        |        |                           | <i>ARHGDA1A</i>     | Rho GDP dissociation inhibitor (GDI) alpha                                              | 17q25.3                               |       |       |                          |               |                                                      |                          |
|                 |                                     |          |        |        |                           | <i>THOC4</i>        | THO complex 4                                                                           | 17q25.3                               |       |       |                          |               |                                                      |                          |
|                 |                                     |          |        |        |                           | <i>ANAPC11</i>      | anaphase promoting complex subunit 11                                                   | 17q25.3                               |       |       |                          |               |                                                      |                          |
|                 |                                     |          |        |        |                           | <i>NPB</i>          | neuropeptide B                                                                          | 17q25.3                               |       |       |                          |               |                                                      |                          |
|                 |                                     |          |        |        |                           | <i>PCYT2</i>        | phosphate cytidylyltransferase 2, ethanolamine                                          | 17q25.3                               |       |       |                          |               |                                                      |                          |
|                 |                                     |          |        |        |                           | <i>SIRT7</i>        | sirtuin (silent mating type information regulation 2 homolog) 7 (S. cerevisiae)         | 17q25                                 |       |       |                          |               |                                                      |                          |
|                 |                                     |          |        |        |                           | <i>MAFG</i>         | v-maf musculoaponeurotic fibrosarcoma oncogene homolog G (avian)                        | 17q25.3                               |       |       |                          |               |                                                      |                          |
|                 |                                     |          |        |        |                           | <i>LOC92659</i>     | hypothetical LOC92659                                                                   | 17q25.3                               |       |       |                          |               |                                                      |                          |
|                 |                                     |          |        |        |                           | <i>PYCR1</i>        | pyrroline-5-carboxylate reductase 1                                                     | 17q25.3                               |       |       |                          |               |                                                      |                          |
|                 |                                     |          |        |        |                           | <i>MYADM12</i>      | myeloid-associated differentiation marker-like 2                                        | 17q25.3                               |       |       |                          |               |                                                      |                          |
|                 |                                     |          |        |        |                           | <i>NOTUM</i>        | notum pectinacetyltransferase homolog (Drosophila)                                      | 17q25.3                               |       |       |                          |               |                                                      |                          |
|                 |                                     |          |        |        |                           | <b>ASPSCR1</b>      | <b>alveolar soft part sarcoma chromosome region, candidate 1</b>                        | <b>17q25.3</b>                        |       |       |                          |               |                                                      |                          |
|                 |                                     |          |        |        |                           | <i>STRA13</i>       | stimulated by retinoic acid 13 homolog (mouse)                                          | 17q25.3                               |       |       |                          |               |                                                      |                          |
|                 |                                     |          |        |        |                           | <i>LRR45</i>        | leucine rich repeat containing 45                                                       | 17q25.3                               |       |       |                          |               |                                                      |                          |
|                 |                                     |          |        |        |                           | <i>RAC3</i>         | ras-related C3 botulinum toxin substrate 3 (rho family, small GTP binding protein Rac3) | 17q25.3                               |       |       |                          |               |                                                      |                          |
|                 |                                     |          |        |        |                           | <i>DCXR</i>         | dicarboxyl-L-xylylucose reductase                                                       | 17q25.3                               |       |       |                          |               |                                                      |                          |
|                 |                                     |          |        |        |                           | <i>C9orf140</i>     | chromosome 9 open reading frame 140                                                     | 9q34.3                                |       |       |                          |               |                                                      |                          |
|                 |                                     |          |        |        |                           | <i>UAP1L1</i>       | UDP-N-acetylglucosamine pyrophosphorylase 1-like 1                                      | 9q34.3                                |       |       |                          |               |                                                      |                          |
|                 |                                     |          |        |        |                           | <i>LOC100289341</i> | similar to hCG2022304                                                                   | 9q34.3                                |       |       |                          |               |                                                      |                          |
|                 |                                     |          |        |        |                           | <i>MAN1B1</i>       | mannosidase, alpha, class 1B, member 1                                                  | 9q34                                  |       |       |                          |               |                                                      |                          |
|                 |                                     |          |        |        |                           | <i>PPP7</i>         | dipeptidyl-peptidase 7                                                                  | 9q34.3                                |       |       |                          |               |                                                      |                          |
|                 |                                     |          |        |        |                           | <i>GRIN1</i>        | glutamate receptor, ionotropic, N-methyl D-aspartate 1                                  | 9q34.3                                |       |       |                          |               |                                                      |                          |
|                 |                                     |          |        |        |                           | <i>LRR426</i>       | leucine rich repeat containing 26                                                       | 9q34.3                                |       |       |                          |               |                                                      |                          |
|                 |                                     |          |        |        |                           | <i>ANAPC2</i>       | anaphase promoting complex subunit 2                                                    | 9q34.3                                |       |       |                          |               |                                                      |                          |
|                 |                                     |          |        |        |                           | <i>SSNA1</i>        | Sjogren syndrome nuclear autoantigen 1                                                  | 9q34.3                                |       |       |                          |               |                                                      |                          |
|                 |                                     |          |        |        |                           | <i>TPRN</i>         | taperin                                                                                 | 9q34.3                                |       |       |                          |               |                                                      |                          |
|                 |                                     |          |        |        |                           | <i>TMEM203</i>      | transmembrane protein 203                                                               | 9q34.3                                |       |       |                          |               |                                                      |                          |
|                 |                                     |          |        |        |                           | <i>NDOR1</i>        | NADPH dependent diflavin oxidoreductase 1                                               | 9q34.3                                |       |       |                          |               |                                                      |                          |
| <i>RNF208</i>   | ring finger protein 208             | 9q34.3   |        |        |                           |                     |                                                                                         |                                       |       |       |                          |               |                                                      |                          |
| <i>C9orf169</i> | chromosome 9 open reading frame 169 | 9q34.3   |        |        |                           |                     |                                                                                         |                                       |       |       |                          |               |                                                      |                          |

| Clone ID    | Dog chromosome location                                                             | # scored | % loss | % gain | Human chromosome location | Gene Symbol | Gene Description                                                                    | Human cytogenetic assignment (Entrez) |      |       |                        |          |                                                               |           |
|-------------|-------------------------------------------------------------------------------------|----------|--------|--------|---------------------------|-------------|-------------------------------------------------------------------------------------|---------------------------------------|------|-------|------------------------|----------|---------------------------------------------------------------|-----------|
| CH82-191C16 | chr9:51728581-51921514                                                              | 98       | 5.1%   | 23.5%  | chr9:139949582-140188358  | LOC643596   | hypothetical LOC643596                                                              | 9q34.3                                |      |       |                        |          |                                                               |           |
|             |                                                                                     |          |        |        |                           | SLC24A3     | solute carrier family 34 (sodium phosphate), member 3                               | 9q34                                  |      |       |                        |          |                                                               |           |
|             |                                                                                     |          |        |        |                           | TUBB2C      | tubulin, beta 2C                                                                    | 9q34                                  |      |       |                        |          |                                                               |           |
|             |                                                                                     |          |        |        |                           | FAM166A     | family with sequence similarity 166, member A                                       | 9q34.3                                |      |       |                        |          |                                                               |           |
|             |                                                                                     |          |        |        |                           | C9orf173    | chromosome 9 open reading frame 173                                                 | 9q34.3                                |      |       |                        |          |                                                               |           |
|             |                                                                                     |          |        |        |                           | COBRA1      | cofactor of BRCA1                                                                   | 9q34                                  |      |       |                        |          |                                                               |           |
|             |                                                                                     |          |        |        |                           | C9orf167    | chromosome 9 open reading frame 167                                                 | 9q34.3                                |      |       |                        |          |                                                               |           |
|             |                                                                                     |          |        |        |                           | GARNL3      | GTase activating Rap/RanGAP domain-like 3                                           | 9q33.3                                |      |       |                        |          |                                                               |           |
|             |                                                                                     |          |        |        |                           | SLC2A8      | solute carrier family 2 (facilitated glucose transporter), member 8                 | 9q33.3                                |      |       |                        |          |                                                               |           |
|             |                                                                                     |          |        |        |                           | ZNF79       | zinc finger protein 79                                                              | 9q34                                  |      |       |                        |          |                                                               |           |
| CH82-126H22 | chr9:59165710-59371881                                                              | 111      | 20.7%  | 0.0%   | chr9:130038258-130308910  | RPL12       | ribosomal protein L12                                                               | 9q34                                  |      |       |                        |          |                                                               |           |
|             |                                                                                     |          |        |        |                           | SNORA65     | small nucleolar RNA, H/ACA box 65                                                   | 9q34                                  |      |       |                        |          |                                                               |           |
|             |                                                                                     |          |        |        |                           | LRSAMI      | leucine rich repeat and sterile alpha motif containing 1                            | 9q33.3                                |      |       |                        |          |                                                               |           |
|             |                                                                                     |          |        |        |                           | FAM129B     | family with sequence similarity 129, member B                                       | 9q33.3-q34.11                         |      |       |                        |          |                                                               |           |
|             |                                                                                     |          |        |        |                           | CDC42EP1    | CDC42 effector protein (Rho GTPase binding) 1                                       | 22q13.1                               |      |       |                        |          |                                                               |           |
|             |                                                                                     |          |        |        |                           | LGALS2      | lectin, galactoside-binding, soluble, 2                                             | 22q12-q13 22q13.1                     |      |       |                        |          |                                                               |           |
|             |                                                                                     |          |        |        |                           | GGAI1       | gq1q-associated, gamma adaptin ear containing, ARF binding protein 1                | 22q13.31                              |      |       |                        |          |                                                               |           |
|             |                                                                                     |          |        |        |                           | SH3BP1      | SH3-domain binding protein 1                                                        | 22q13.1                               |      |       |                        |          |                                                               |           |
|             |                                                                                     |          |        |        |                           | PDXP        | pyridoxal (pyridoxine, vitamin B6) phosphatase                                      | 22cen-q12.3                           |      |       |                        |          |                                                               |           |
|             |                                                                                     |          |        |        |                           | LGALS1      | lectin, galactoside-binding, soluble, 1                                             | 22q13.1                               |      |       |                        |          |                                                               |           |
| CH82-126H04 | chr10:29914305-30103505                                                             | 112      | 3.6%   | 23.2%  | chr22:37948701-38188788   | NOL12       | nucleolar protein 12                                                                | 22q13.1                               |      |       |                        |          |                                                               |           |
|             |                                                                                     |          |        |        |                           | TRIOBP      | TRIO and F-actin binding protein                                                    | 22q13.1                               |      |       |                        |          |                                                               |           |
|             |                                                                                     |          |        |        |                           | MYH9        | myosin, heavy chain 9, non-muscle                                                   | 22q13.1                               |      |       |                        |          |                                                               |           |
|             |                                                                                     |          |        |        |                           | TXN2        | thioredoxin 2                                                                       | 22q13.1                               |      |       |                        |          |                                                               |           |
|             |                                                                                     |          |        |        |                           | FOXRED2     | FAD-dependent oxidoreductase domain containing 2                                    | 22q12.3                               |      |       |                        |          |                                                               |           |
|             |                                                                                     |          |        |        |                           | ADD2        | adducin 2 (beta)                                                                    | 2n14-p13                              |      |       |                        |          |                                                               |           |
|             |                                                                                     |          |        |        |                           | FIGLA       | folliculogenesis specific basic helix-loop-helix                                    | 2p13.3                                |      |       |                        |          |                                                               |           |
|             |                                                                                     |          |        |        |                           | CLEC4F      | C-type lectin domain family 4, member F                                             | 2p13.3                                |      |       |                        |          |                                                               |           |
|             |                                                                                     |          |        |        |                           | CD207       | CD207 molecule, langerin                                                            | 2p13                                  |      |       |                        |          |                                                               |           |
|             |                                                                                     |          |        |        |                           | VAX2        | ventral anterior homeobox 2                                                         | 2p13                                  |      |       |                        |          |                                                               |           |
| CH82-122D20 | chr10:30979474-31151498                                                             | 95       | 0.0%   | 40.0%  | chr22:36725725-36903689   | EPH47       | EPH receptor A7                                                                     | 6q16.1                                |      |       |                        |          |                                                               |           |
|             |                                                                                     |          |        |        |                           | MIRAL2      | MIPA-like domain containing 2                                                       | 8q22.2                                |      |       |                        |          |                                                               |           |
|             |                                                                                     |          |        |        |                           | KCNS2       | potassium voltage-gated channel, delayed-rectifier, subfamily S, member 2           | 8q22                                  |      |       |                        |          |                                                               |           |
|             |                                                                                     |          |        |        |                           | VPS13B      | vacuolar protein sorting 13 homolog B (yeast)                                       | 8q22.2                                |      |       |                        |          |                                                               |           |
|             |                                                                                     |          |        |        |                           | MIR599      | microRNA 599                                                                        | 8q22.2                                |      |       |                        |          |                                                               |           |
|             |                                                                                     |          |        |        |                           | MIR875      | microRNA 875                                                                        | 8q22.2                                |      |       |                        |          |                                                               |           |
|             |                                                                                     |          |        |        |                           | ODF1        | outer dense fiber of sperm tails 1                                                  | 8q22.3                                |      |       |                        |          |                                                               |           |
|             |                                                                                     |          |        |        |                           | KLF10       | Kruppel-like factor 10                                                              | 8q22.2                                |      |       |                        |          |                                                               |           |
|             |                                                                                     |          |        |        |                           | DPSY        | dihydropyrimidinase                                                                 | 8q22                                  |      |       |                        |          |                                                               |           |
|             |                                                                                     |          |        |        |                           | LRP12       | low density lipoprotein receptor-related protein 12                                 | 8q22.2-q23.1                          |      |       |                        |          |                                                               |           |
| CH82-330P10 | chr10:72197473-72387373                                                             | 109      | 5.5%   | 21.1%  | chr2:70859179-71135120    | NUDCD1      | NudC domain containing 1                                                            | 8q23                                  |      |       |                        |          |                                                               |           |
|             |                                                                                     |          |        |        |                           | ENV2        | enhancer of yellow 2 homolog (Drosophila)                                           | 8q23.1                                |      |       |                        |          |                                                               |           |
|             |                                                                                     |          |        |        |                           | EXT1        | exostoses (multiple) 1                                                              | 8q24.11-q24.13                        |      |       |                        |          |                                                               |           |
|             |                                                                                     |          |        |        |                           | SAMD12      | sterile alpha motif domain containing 12                                            | 8q24.12                               |      |       |                        |          |                                                               |           |
|             |                                                                                     |          |        |        |                           | NOV         | nephroblastoma overexpressed gene                                                   | 8q24.1                                |      |       |                        |          |                                                               |           |
|             |                                                                                     |          |        |        |                           | CH82-126O14 | chr12:55210203-55385761                                                             | 52                                    | 0.0% | 46.2% | chr6:94030118-94216120 | FER1L6   | fer-1-like 6 (C. elegans)                                     | -         |
|             |                                                                                     |          |        |        |                           |             |                                                                                     |                                       |      |       |                        | MYC      | v-myc myelocytomatosis viral oncogene homolog (avian)         | 8q24.21   |
|             |                                                                                     |          |        |        |                           |             |                                                                                     |                                       |      |       |                        | ADCY8    | adenylyl cyclase 8 (brain)                                    | 8q24      |
|             |                                                                                     |          |        |        |                           |             |                                                                                     |                                       |      |       |                        | KCNO3    | potassium voltage-gated channel, KOT-like subfamily, member 3 | 8q24      |
|             |                                                                                     |          |        |        |                           |             |                                                                                     |                                       |      |       |                        | ZFAT     | zinc finger and AT hook domain containing                     | 8q24.22   |
| ZFATAS      | ZFAT antisense RNA (non-protein coding)                                             | 8q24.22  |        |        |                           |             |                                                                                     |                                       |      |       |                        |          |                                                               |           |
| CH82-328P06 | chr13:8630921-8818498                                                               | 108      | 0.9%   | 34.3%  | chr8:105416146-105665885  |             |                                                                                     |                                       |      |       |                        | PTK2     | PTK2 protein tyrosine kinase 2                                | 8q24-qter |
|             |                                                                                     |          |        |        |                           |             |                                                                                     |                                       |      |       |                        | TSNARE1  | t-SNARE domain containing 1                                   | 8q24.3    |
|             |                                                                                     |          |        |        |                           |             |                                                                                     |                                       |      |       |                        | BAI1     | brain-specific angiogenesis inhibitor 1                       | 8q24      |
|             |                                                                                     |          |        |        |                           |             |                                                                                     |                                       |      |       |                        | ARC      | activity-regulated cytoskeleton-associated protein            | 8q24.3    |
|             |                                                                                     |          |        |        |                           | HSF1        | heat shock transcription factor 1                                                   | 8q24.3                                |      |       |                        |          |                                                               |           |
|             |                                                                                     |          |        |        |                           | DGAT1       | diacylglycerol O-acyltransferase homolog 1 (mouse)                                  | 8q24.3                                |      |       |                        |          |                                                               |           |
|             |                                                                                     |          |        |        |                           | SCRT1       | scratch homolog 1, zinc finger protein (Drosophila)                                 | 8q24.3                                |      |       |                        |          |                                                               |           |
|             |                                                                                     |          |        |        |                           | CBORFK29    | hypothetical LOC340393                                                              | 8q24.3                                |      |       |                        |          |                                                               |           |
|             |                                                                                     |          |        |        |                           | FBXL6       | F-box and leucine-rich repeat protein 6                                             | 8q24.3                                |      |       |                        |          |                                                               |           |
|             |                                                                                     |          |        |        |                           | GPR172A     | G protein-coupled receptor 172A                                                     | 8q24.3                                |      |       |                        |          |                                                               |           |
| CH82-326G03 | chr13:9888412-10077025                                                              | 104      | 0.0%   | 27.9%  | chr8:106907474-107185416  | ADCK5       | aaRF domain containing kinase 5                                                     | 8q24.3                                |      |       |                        |          |                                                               |           |
|             |                                                                                     |          |        |        |                           | CPSF1       | cleavage and polyadenylation specific factor 1, 160kDa                              | 8q24.23                               |      |       |                        |          |                                                               |           |
|             |                                                                                     |          |        |        |                           | MIR939      | microRNA 939                                                                        | 8q24.3                                |      |       |                        |          |                                                               |           |
|             |                                                                                     |          |        |        |                           | MIR1234     | microRNA 1234                                                                       | -                                     |      |       |                        |          |                                                               |           |
|             |                                                                                     |          |        |        |                           | SLC39A4     | solute carrier family 39 (zinc transporter), member 4                               | 8q24.3                                |      |       |                        |          |                                                               |           |
|             |                                                                                     |          |        |        |                           | VPS28       | vacuolar protein sorting 28 homolog (S. cerevisiae)                                 | 8q24.3                                |      |       |                        |          |                                                               |           |
|             |                                                                                     |          |        |        |                           | NFKB1L2     | nuclear factor of kappa light polypeptide gene enhancer in B-cells inhibitor-like 2 | 8q24.3                                |      |       |                        |          |                                                               |           |
|             |                                                                                     |          |        |        |                           | CYHR1       | cysteine/histidine-rich 1                                                           | 8q24.3                                |      |       |                        |          |                                                               |           |
|             |                                                                                     |          |        |        |                           | KIFC2       | kinesin family member C2                                                            | 8q24.3                                |      |       |                        |          |                                                               |           |
|             |                                                                                     |          |        |        |                           | FOXH1       | forkhead box H1                                                                     | 8q24.3                                |      |       |                        |          |                                                               |           |
| CH82-186J06 | chr13:38344515-38552798                                                             | 108      | 0.0%   | 43.5%  | chr8:141669136-141928990  | LIMCH1      | LIM and calponin homology domains 1                                                 | 4p13                                  |      |       |                        |          |                                                               |           |
|             |                                                                                     |          |        |        |                           | USP46       | ubiquitin specific peptidase 46                                                     | 4q12                                  |      |       |                        |          |                                                               |           |
|             |                                                                                     |          |        |        |                           | KIAA0114    | KIAA0114                                                                            | 4q12                                  |      |       |                        |          |                                                               |           |
|             |                                                                                     |          |        |        |                           | SNORA26     | small nucleolar RNA, H/ACA box 26                                                   | 4q12                                  |      |       |                        |          |                                                               |           |
|             |                                                                                     |          |        |        |                           | RPL21P44    | ribosomal protein L21 pseudogene 44                                                 | 4q12                                  |      |       |                        |          |                                                               |           |
|             |                                                                                     |          |        |        |                           | CHIC2       | cysteine-rich hydrophobic domain 2                                                  | 4q11                                  |      |       |                        |          |                                                               |           |
|             |                                                                                     |          |        |        |                           | KIT         | v-kit Hardy-Zuckerman 4 feline sarcoma viral oncogene homolog                       | 4q11-q12                              |      |       |                        |          |                                                               |           |
|             |                                                                                     |          |        |        |                           | CH82-186J22 | chr13:45483218-45670474                                                             | 112                                   | 0.0% | 25.9% | chr4:4647999-46722549  | FBXL6    | F-box and leucine-rich repeat protein 6                       | 8q24.3    |
|             |                                                                                     |          |        |        |                           |             |                                                                                     |                                       |      |       |                        | GPR172A  | G protein-coupled receptor 172A                               | 8q24.3    |
|             |                                                                                     |          |        |        |                           |             |                                                                                     |                                       |      |       |                        | ADCK5    | aaRF domain containing kinase 5                               | 8q24.3    |
| CPSF1       | cleavage and polyadenylation specific factor 1, 160kDa                              | 8q24.23  |        |        |                           |             |                                                                                     |                                       |      |       |                        |          |                                                               |           |
| MIR939      | microRNA 939                                                                        | 8q24.3   |        |        |                           |             |                                                                                     |                                       |      |       |                        |          |                                                               |           |
| MIR1234     | microRNA 1234                                                                       | -        |        |        |                           |             |                                                                                     |                                       |      |       |                        |          |                                                               |           |
| SLC39A4     | solute carrier family 39 (zinc transporter), member 4                               | 8q24.3   |        |        |                           |             |                                                                                     |                                       |      |       |                        |          |                                                               |           |
| VPS28       | vacuolar protein sorting 28 homolog (S. cerevisiae)                                 | 8q24.3   |        |        |                           |             |                                                                                     |                                       |      |       |                        |          |                                                               |           |
| NFKB1L2     | nuclear factor of kappa light polypeptide gene enhancer in B-cells inhibitor-like 2 | 8q24.3   |        |        |                           |             |                                                                                     |                                       |      |       |                        |          |                                                               |           |
| CYHR1       | cysteine/histidine-rich 1                                                           | 8q24.3   |        |        |                           |             |                                                                                     |                                       |      |       |                        |          |                                                               |           |
| CH82-398P13 | chr13:40762011-40939942                                                             | 113      | 0.9%   | 37.2%  | chr8:145523684-145710479  | USP46       | ubiquitin specific peptidase 46                                                     | 4q12                                  |      |       |                        |          |                                                               |           |
|             |                                                                                     |          |        |        |                           | KIAA0114    | KIAA0114                                                                            | 4q12                                  |      |       |                        |          |                                                               |           |
|             |                                                                                     |          |        |        |                           | SNORA26     | small nucleolar RNA, H/ACA box 26                                                   | 4q12                                  |      |       |                        |          |                                                               |           |
|             |                                                                                     |          |        |        |                           | RPL21P44    | ribosomal protein L21 pseudogene 44                                                 | 4q12                                  |      |       |                        |          |                                                               |           |
|             |                                                                                     |          |        |        |                           | CHIC2       | cysteine-rich hydrophobic domain 2                                                  | 4q11                                  |      |       |                        |          |                                                               |           |
|             |                                                                                     |          |        |        |                           | KIT         | v-kit Hardy-Zuckerman 4 feline sarcoma viral oncogene homolog                       | 4q11-q12                              |      |       |                        |          |                                                               |           |
|             |                                                                                     |          |        |        |                           | CH82-323B16 | chr13:41613250-41796345                                                             | 112                                   | 2.7% | 41.1% | chr4:41414665-41631385 | USP46    | ubiquitin specific peptidase 46                               | 4q12      |
|             |                                                                                     |          |        |        |                           |             |                                                                                     |                                       |      |       |                        | KIAA0114 | KIAA0114                                                      | 4q12      |
|             |                                                                                     |          |        |        |                           |             |                                                                                     |                                       |      |       |                        | SNORA26  | small nucleolar RNA, H/ACA box 26                             | 4q12      |
|             |                                                                                     |          |        |        |                           |             |                                                                                     |                                       |      |       |                        | RPL21P44 | ribosomal protein L21 pseudogene 44                           | 4q12      |
| CHIC2       | cysteine-rich hydrophobic domain 2                                                  | 4q11     |        |        |                           |             |                                                                                     |                                       |      |       |                        |          |                                                               |           |
| KIT         | v-kit Hardy-Zuckerman 4 feline sarcoma viral oncogene homolog                       | 4q11-q12 |        |        |                           |             |                                                                                     |                                       |      |       |                        |          |                                                               |           |
| CH82-388P03 | chr13:43328496-43501635                                                             | 112      | 0.9%   | 23.2%  | chr4:43567811-43833807    |             |                                                                                     |                                       |      |       |                        | USP46    | ubiquitin specific peptidase 46                               | 4q12      |
|             |                                                                                     |          |        |        |                           |             |                                                                                     |                                       |      |       |                        | KIAA0114 | KIAA0114                                                      | 4q12      |
|             |                                                                                     |          |        |        |                           |             |                                                                                     |                                       |      |       |                        | SNORA26  | small nucleolar RNA, H/ACA box 26                             | 4q12      |
|             |                                                                                     |          |        |        |                           |             |                                                                                     |                                       |      |       |                        | RPL21P44 | ribosomal protein L21 pseudogene 44                           | 4q12      |
|             |                                                                                     |          |        |        |                           | CHIC2       | cysteine-rich hydrophobic domain 2                                                  | 4q11                                  |      |       |                        |          |                                                               |           |
|             |                                                                                     |          |        |        |                           | KIT         | v-kit Hardy-Zuckerman 4 feline sarcoma viral oncogene homolog                       | 4q11-q12                              |      |       |                        |          |                                                               |           |
|             |                                                                                     |          |        |        |                           | CH82-186J22 | chr13:45483218-45670474                                                             | 112                                   | 0.0% | 25.9% | chr4:4647999-46722549  | USP46    | ubiquitin specific peptidase 46                               | 4q12      |
|             |                                                                                     |          |        |        |                           |             |                                                                                     |                                       |      |       |                        | KIAA0114 | KIAA0114                                                      | 4q12      |
|             |                                                                                     |          |        |        |                           |             |                                                                                     |                                       |      |       |                        | SNORA26  | small nucleolar RNA, H/ACA box 26                             | 4q12      |
|             |                                                                                     |          |        |        |                           |             |                                                                                     |                                       |      |       |                        | RPL21P44 | ribosomal protein L21 pseudogene 44                           | 4q12      |
| CHIC2       | cysteine-rich hydrophobic domain 2                                                  | 4q11     |        |        |                           |             |                                                                                     |                                       |      |       |                        |          |                                                               |           |
| KIT         | v-kit Hardy-Zuckerman 4 feline sarcoma viral oncogene homolog                       | 4q11-q12 |        |        |                           |             |                                                                                     |                                       |      |       |                        |          |                                                               |           |
| CH82-191B15 | chr13:49339012-49547283                                                             | 111      | 0.0%   | 36.9%  | chr4:54706702-54937099    |             |                                                                                     |                                       |      |       |                        | USP46    | ubiquitin specific peptidase 46                               | 4q12      |
|             |                                                                                     |          |        |        |                           |             |                                                                                     |                                       |      |       |                        | KIAA0114 | KIAA0114                                                      | 4q12      |
|             |                                                                                     |          |        |        |                           |             |                                                                                     |                                       |      |       |                        | SNORA26  | small nucleolar RNA, H/ACA box 26                             | 4q12      |
|             |                                                                                     |          |        |        |                           |             |                                                                                     |                                       |      |       |                        | RPL21P44 | ribosomal protein L21 pseudogene 44                           | 4q12      |
|             |                                                                                     |          |        |        |                           | CHIC2       | cysteine-rich hydrophobic domain 2                                                  | 4q11                                  |      |       |                        |          |                                                               |           |
|             |                                                                                     |          |        |        |                           | KIT         | v-kit Hardy-Zuckerman 4 feline sarcoma viral oncogene homolog                       | 4q11-q12                              |      |       |                        |          |                                                               |           |
|             |                                                                                     |          |        |        |                           | CH82-524B22 | chr13:49991362-50201827                                                             | 112                                   | 0.0% | 39.3% | chr4:55473043-55723285 | USP46    | ubiquitin specific peptidase 46                               | 4q12      |
|             |                                                                                     |          |        |        |                           |             |                                                                                     |                                       |      |       |                        | KIAA0114 | KIAA0114                                                      | 4q12      |
|             |                                                                                     |          |        |        |                           |             |                                                                                     |                                       |      |       |                        | SNORA26  | small nucleolar RNA, H/ACA box 26                             | 4q12      |
|             |                                                                                     |          |        |        |                           |             |                                                                                     |                                       |      |       |                        | RPL21P44 | ribosomal protein L21 pseudogene 44                           | 4q12      |
| CHIC2       | cysteine-rich hydrophobic domain 2                                                  | 4q11     |        |        |                           |             |                                                                                     |                                       |      |       |                        |          |                                                               |           |
| KIT         | v-kit Hardy-Zuckerman 4 feline sarcoma viral oncogene homolog                       | 4q11-q12 |        |        |                           |             |                                                                                     |                                       |      |       |                        |          |                                                               |           |
| CH82-98B16  | chr13:50017517-50212194                                                             | 110      | 1.8%   | 33.6%  | chr4:55497669-55737857    |             |                                                                                     |                                       |      |       |                        | USP46    | ubiquitin specific peptidase 46                               | 4q12      |
|             |                                                                                     |          |        |        |                           |             |                                                                                     |                                       |      |       |                        | KIAA0114 | KIAA0114                                                      | 4q12      |
|             |                                                                                     |          |        |        |                           |             |                                                                                     |                                       |      |       |                        | SNORA26  | small nucleolar RNA, H/ACA box 26                             | 4q12      |
|             |                                                                                     |          |        |        |                           |             |                                                                                     |                                       |      |       |                        | RPL21P44 | ribosomal protein L21 pseudogene 44                           | 4q12      |
|             |                                                                                     |          |        |        |                           | CHIC2       | cysteine-rich hydrophobic domain 2                                                  | 4q11                                  |      |       |                        |          |                                                               |           |
|             |                                                                                     |          |        |        |                           | KIT         | v-kit Hardy-Zuckerman 4 feline sarcoma viral oncogene homolog                       | 4q11-q12                              |      |       |                        |          |                                                               |           |

| Clone ID    | Dog chromosome location | # scored | % loss | % gain | Human chromosome location | Gene Symbol         | Gene Description                                                                         | Human cytogenetic assignment (Entrez) |
|-------------|-------------------------|----------|--------|--------|---------------------------|---------------------|------------------------------------------------------------------------------------------|---------------------------------------|
| CH82-186108 | chr13:50171622-50370090 | 105      | 0.0%   | 43.8%  | chr4:55681327-55940616    |                     |                                                                                          |                                       |
| CH82-330611 | chr13:51352542-51547357 | 113      | 0.0%   | 25.7%  | chr4:57035548-57256686    | <i>KIAA1211</i>     | KIAA1211                                                                                 | 4q12                                  |
| CH82-328B19 | chr13:53334697-53537896 | 96       | 2.1%   | 26.0%  | chr4:59317732-59587167    | <i>AASDH</i>        | aminoacidpate-semialdehyde dehydrogenase                                                 | 4q12                                  |
| CH82-197F14 | chr13:57193340-57220807 | 86       | 0.0%   | 30.2%  | chr4:63869308-63902557    |                     |                                                                                          |                                       |
| CH82-474105 | chr13:60719125-60914172 | 113      | 0.0%   | 25.7%  | chr4:67987053-68242173    |                     |                                                                                          |                                       |
| CH82-323012 | chr13:61972683-62157466 | 110      | 0.9%   | 21.8%  | chr4:70212051-70577710    | <i>UGT2B4</i>       | UDP glucuronosyltransferase 2 family, polypeptide B4                                     | 4q13                                  |
| CH82-340G10 | chr13:63490308-63673646 | 112      | 0.9%   | 32.1%  | chr4:72305759-72523249    | <i>UGT2A1</i>       | UDP glucuronosyltransferase 2 family, polypeptide A1                                     | 4q13                                  |
| CH82-186G02 | chr13:64868824-65056232 | 103      | 1.0%   | 34.0%  | chr4:73989160-74216896    | <i>UGT2A2</i>       | UDP glucuronosyltransferase 2 family, polypeptide A2                                     | 4q13.3                                |
| CH82-122004 | chr14:28016658-28209743 | 108      | 6.5%   | 25.9%  | chr7:9805474-10068600     | <i>SLC44A4</i>      | solute carrier family 4, sodium bicarbonate cotransporter, member 4                      | 4q21                                  |
| CH82-186K08 | chr16:4135123-4259796   | 110      | 10.9%  | 22.7%  | chr7:45313227-45635342    | <i>ANKRD17</i>      | ankyrin repeat domain 17                                                                 | 4q13.3                                |
| CH82-326D07 | chr17:3201167-3398989   | 101      | 7.9%   | 27.7%  | chr2:253915-574648        | <i>ADCY1</i>        | adenylate cyclase 1 (brain)                                                              | 7p13-p12                              |
| CH82-521K12 | chr18:28514173-28761057 | 110      | 3.6%   | 22.7%  | chr11:374100-713014       | <i>SH3YL1</i>       | SH3 domain containing, Ysc84-like 1 (S. cerevisiae)                                      | 2p25.3                                |
| CH82-335E11 | chr20:9093097-9273156   | 111      | 0.0%   | 20.7%  | chr3:12325450-12527804    | <i>ACP1</i>         | acid phosphatase 1, soluble                                                              | 2p25                                  |
| CH82-287E13 | chr20:41988099-42196399 | 112      | 5.4%   | 22.3%  | chr3:50159395-50407287    | <i>FAM150B</i>      | family with sequence similarity 150, member B                                            | 2p25.3                                |
| CH82-325G21 | chr20:60892993-61088125 | 101      | 1.0%   | 26.7%  | chr19:582910-922007       | <i>B4GALNT4</i>     | beta-1,4-N-acetyl-galactosaminyl transferase 4                                           | 11p15.5                               |
| CH82-126K03 | chr22:6667906-6872711   | 108      | 23.1%  | 15.7%  | chr13:48011064-48228965   | <i>PKP3</i>         | plakophilin 3                                                                            | 11p15.5                               |
| CH82-182B05 | chr24:49428264-49626425 | 106      | 5.7%   | 27.4%  | chr20:60988628-61343858   | <i>SIGIRR</i>       | single immunoglobulin and toll-interleukin 1 receptor (TIR) domain                       | 11p15.5                               |
| CH82-315F17 | chr26:28431891-28682961 | 57       | 29.8%  | 8.8%   | nd                        | <i>ANO9</i>         | anoctamin 9                                                                              | 11p15.5                               |
| CH82-313020 | chr26:29493753-29700773 | 97       | 44.3%  | 1.0%   | nd                        | <i>PTDSS2</i>       | phosphatidylinserine synthase 2                                                          | 11p15.5                               |
| CH82-518M17 | chr26:30333217-30501573 | 106      | 69.8%  | 0.0%   | chr22:23040362-23163490   | <i>RNH1</i>         | ribonuclease/angiogenin inhibitor 1                                                      | 11p15.5                               |
| CH82-328I02 | chr27:16163484-16258720 | 104      | 29.8%  | 21.2%  | chr12:40807684-40854854   | <i>HRAS</i>         | v-Ha-ras Harvey rat sarcoma viral oncogene homolog                                       | 11p15.5                               |
|             |                         |          |        |        |                           | <i>HRX356</i>       | leucine rich repeat containing 56                                                        | 11p15.5                               |
|             |                         |          |        |        |                           | <i>C11orf35</i>     | chromosome 11 open reading frame 35                                                      | 11p15.5                               |
|             |                         |          |        |        |                           | <i>RASSF7</i>       | Ras association (RalGDS/AF-6) domain family (N-terminal) member 7                        | 11p15.5                               |
|             |                         |          |        |        |                           | <i>MIR210</i>       | microRNA 210                                                                             | 11p15.5                               |
|             |                         |          |        |        |                           | <i>LOC143666</i>    | hypothetical protein LOC143666                                                           | 11p15.5                               |
|             |                         |          |        |        |                           | <i>PHRF1</i>        | PHD and ring finger domains 1                                                            | 11p15.5                               |
|             |                         |          |        |        |                           | <i>IRF7</i>         | interferon regulatory factor 7                                                           | 11p15.5                               |
|             |                         |          |        |        |                           | <i>CDHR5</i>        | cadherin-related family member 5                                                         | 11p15.5                               |
|             |                         |          |        |        |                           | <i>SCT</i>          | secretin                                                                                 | 11p15.5                               |
|             |                         |          |        |        |                           | <i>DRD4</i>         | dopamine receptor D4                                                                     | 11p15.5                               |
|             |                         |          |        |        |                           | <i>DEAF1</i>        | deformed epidermal autoregulatory factor 1 (Drosophila)                                  | 11p15.5                               |
|             |                         |          |        |        |                           | <i>TMEM80</i>       | transmembrane protein 80                                                                 | 11p15.5                               |
|             |                         |          |        |        |                           | <i>EPSB2</i>        | EP5B-like 2                                                                              | 11p15.5                               |
|             |                         |          |        |        |                           | <i>PPARG</i>        | peroxisome proliferator-activated receptor gamma                                         | 3p25                                  |
|             |                         |          |        |        |                           | <i>TSEN2</i>        | tRNA splicing endonuclease 2 homolog (S. cerevisiae)                                     | 3p25.2                                |
|             |                         |          |        |        |                           | <i>SEMA3F</i>       | sema domain, immunoglobulin domain (Ig), short basic domain, secreted, (semaphorin) 3F   | 3p21.3                                |
|             |                         |          |        |        |                           | <i>GNAT1</i>        | guanine nucleotide binding protein (G protein), alpha transducing activity polypeptide 1 | 3p21                                  |
|             |                         |          |        |        |                           | <i>SLC38A3</i>      | solute carrier family 38, member 3                                                       | 3p21.3                                |
|             |                         |          |        |        |                           | <i>GNAI2</i>        | guanine nucleotide binding protein (G protein), alpha inhibiting activity polypeptide 2  | 3p21                                  |
|             |                         |          |        |        |                           | <i>SEMA3B</i>       | sema domain, immunoglobulin domain (Ig), short basic domain, secreted, (semaphorin) 3B   | 3p21.3                                |
|             |                         |          |        |        |                           | <i>C3orf45</i>      | chromosome 3 open reading frame 45                                                       | 3p21.31                               |
|             |                         |          |        |        |                           | <i>IFRD2</i>        | interferon-related developmental regulator 2                                             | 3p21.3                                |
|             |                         |          |        |        |                           | <i>HYAL3</i>        | hyaluronoglucosaminidase 3                                                               | 3p21.3                                |
|             |                         |          |        |        |                           | <i>NAT6</i>         | N-acetyltransferase 6 (GCN5-related)                                                     | 3p21.3                                |
|             |                         |          |        |        |                           | <i>HYAL1</i>        | hyaluronoglucosaminidase 1                                                               | 3p21.3-p21.2                          |
|             |                         |          |        |        |                           | <i>HYAL2</i>        | hyaluronoglucosaminidase 2                                                               | 3p21.3                                |
|             |                         |          |        |        |                           | <i>TUSC2</i>        | tumor suppressor candidate 2                                                             | 3p21.3                                |
|             |                         |          |        |        |                           | <i>RASSF1</i>       | Ras association (RalGDS/AF-6) domain family member 1                                     | 3p21.3                                |
|             |                         |          |        |        |                           | <i>ZMYND10</i>      | zinc finger, MYND-type containing 10                                                     | 3p21.3                                |
|             |                         |          |        |        |                           | <i>NPR2</i>         | nitrogen permease regulator-like 2 (S. cerevisiae)                                       | 3p21.3                                |
|             |                         |          |        |        |                           | <i>CYB561D2</i>     | cytochrome b-561 domain containing 2                                                     | 3p21.3                                |
|             |                         |          |        |        |                           | <i>TMEM115</i>      | transmembrane protein 115                                                                | 3p21.3                                |
|             |                         |          |        |        |                           | <i>CACNA2D2</i>     | calcium channel, voltage-dependent, alpha 2/delta subunit 2                              | 3p21.3                                |
|             |                         |          |        |        |                           | <i>BSG</i>          | basigin (Ok blood group)                                                                 | 19p13.3                               |
|             |                         |          |        |        |                           | <i>HCN2</i>         | hyperpolarization activated cyclic nucleotide-gated potassium channel 2                  | 19p13.3                               |
|             |                         |          |        |        |                           | <i>POLRMT</i>       | polymerase (RNA) mitochondrial (DNA directed)                                            | 19p13.3                               |
|             |                         |          |        |        |                           | <i>FGF22</i>        | fibroblast growth factor 22                                                              | 19p13.3                               |
|             |                         |          |        |        |                           | <i>RNF126</i>       | ring finger protein 126                                                                  | 19p13.3                               |
|             |                         |          |        |        |                           | <b>FSTL3</b>        | <b>folliculin-like 3 (secreted glycoprotein)</b>                                         | <b>19p13</b>                          |
|             |                         |          |        |        |                           | <i>PRSS1</i>        | protease, serine-like 1                                                                  | 19p13.3                               |
|             |                         |          |        |        |                           | <i>PALM</i>         | paralemmin                                                                               | 19p13.3                               |
|             |                         |          |        |        |                           | <i>C19orf21</i>     | chromosome 19 open reading frame 21                                                      | 19p13.3                               |
|             |                         |          |        |        |                           | <i>PTBP1</i>        | polypyrimidine tract binding protein 1                                                   | 19p13.3                               |
|             |                         |          |        |        |                           | <i>LPR3</i>         | lipid phosphate phosphatase-related protein type 3                                       | 19p13.3                               |
|             |                         |          |        |        |                           | <i>AZU1</i>         | azuricin 1                                                                               | 19p13.3                               |
|             |                         |          |        |        |                           | <i>PRTN3</i>        | proteinase 3                                                                             | 19p13.3                               |
|             |                         |          |        |        |                           | <i>ELANE</i>        | elastase, neutrophil expressed                                                           | 19p13.3                               |
|             |                         |          |        |        |                           | <i>CFD</i>          | complement factor D (adipsin)                                                            | 19p13.3                               |
|             |                         |          |        |        |                           | <i>MED16</i>        | mediator complex subunit 16                                                              | 19p13.3                               |
|             |                         |          |        |        |                           | <i>C19orf22</i>     | chromosome 19 open reading frame 22                                                      | 19p13.3                               |
|             |                         |          |        |        |                           | <i>KISS1R</i>       | KISS1 receptor                                                                           | 19p13.3                               |
|             |                         |          |        |        |                           | <i>C20orf151</i>    | chromosome 20 open reading frame 151                                                     | 20q13.33                              |
|             |                         |          |        |        |                           | <i>GATA5</i>        | GATA binding protein 5                                                                   | 20q13.33                              |
|             |                         |          |        |        |                           | <i>C20orf200</i>    | chromosome 20 open reading frame 200                                                     | 20q13.33                              |
|             |                         |          |        |        |                           | <i>C20orf166</i>    | chromosome 20 open reading frame 166                                                     | 20q13.33                              |
|             |                         |          |        |        |                           | <i>MIR1-1</i>       | microRNA 1-1                                                                             | 20q13.33                              |
|             |                         |          |        |        |                           | <i>MIR133A2</i>     | microRNA 133a-2                                                                          | 20q13.33                              |
|             |                         |          |        |        |                           | <i>SLC04A1</i>      | solute carrier organic anion transporter family, member 4A1                              | 20q13.33                              |
|             |                         |          |        |        |                           | <i>LOC100127888</i> | hypothetical protein LOC100127888                                                        | 20q13.33                              |
|             |                         |          |        |        |                           | <i>NTSR1</i>        | neurotensin receptor 1 (high affinity)                                                   | 20q13                                 |

| Clone ID    | Dog chromosome location  | # scored | % loss | % gain | Human chromosome location | Gene Symbol       | Gene Description                                                                     | Human cytogenetic assignment (Entrez) |
|-------------|--------------------------|----------|--------|--------|---------------------------|-------------------|--------------------------------------------------------------------------------------|---------------------------------------|
| CH82-335H02 | chr29:9633231-9804796    | 112      | 0.0%   | 31.3%  | chr8:56004716-56170069    | <i>XKR4</i>       | XK, Kell blood group complex subunit-related family, member 4                        | 8q12.1                                |
| CH82-328A08 | chr31:5663658-5861019    | 110      | 1.8%   | 21.8%  | chr3:85077215-85292508    | <i>CADM2</i>      | cell adhesion molecule 2                                                             | 3p12.1                                |
|             |                          |          |        |        |                           | <i>LIP1</i>       | lipin, member 1                                                                      | 21q11.2                               |
|             |                          |          |        |        |                           | <i>RBM11</i>      | RNA binding motif protein 11                                                         | 21q11                                 |
| CH82-328N02 | chr31:14197845-14392011  | 107      | 1.9%   | 23.4%  | chr21:15576483-15758359   | <i>ABCC13</i>     | ATP-binding cassette, sub-family C (CFTR/MRP), member 13                             | 21q11.2                               |
| CH82-323A05 | chr31:16689940-16903251  | 112      | 0.9%   | 20.5%  | chr21:18384552-18724282   | <i>HSPA13</i>     | heat shock protein 70kDa family, member 13                                           | 21q11.1 21q11                         |
| CH82-791I0  | chr31:18603440-18815254  | 93       | 1.1%   | 21.5%  | chr21:20791371-21043655   |                   |                                                                                      |                                       |
|             |                          |          |        |        |                           | <i>DNAJC28</i>    | DnaJ (Hsp40) homolog, subfamily C, member 28                                         | 21q22.11                              |
|             |                          |          |        |        |                           | <i>GART</i>       | phosphoribosylglycinamide formyltransferase, phosphoribosylaminoimidazole synthetase | 21q22.1 21q22.11                      |
|             |                          |          |        |        |                           | <i>SON</i>        | SON DNA binding protein                                                              | 21q22.1-q22.2 21q22.11                |
|             |                          |          |        |        |                           | <i>DONSON</i>     | downstream neighbor of SON                                                           | 21q22.1                               |
| CH82-309P19 | chr31:31123435-31311223  | 108      | 0.0%   | 24.1%  | chr21:34857456-35070402   | <i>CRYZL1</i>     | crystallin, zeta (quinone reductase)-like 1                                          | 21q21.3                               |
| CH82-197B21 | chr31:32547604-32755647  | 112      | 0.0%   | 20.5%  | chr21:36433856-36682123   | <i>ITSN1</i>      | intersectin 1 (SH3 domain protein)                                                   | 21q22.1-q22.2                         |
| CH82-330O21 | chr31:35133151-35336638  | 108      | 0.0%   | 26.9%  | chr21:39290645-39488665   | <i>DSCR4</i>      | Down syndrome critical region gene 4                                                 | 21q22.2                               |
|             |                          |          |        |        |                           | <i>BRWD1</i>      | bromodomain and WD repeat domain containing 1                                        | 21q22.2                               |
|             |                          |          |        |        |                           | <i>HMGNI</i>      | high-mobility group nucleosome binding domain 1                                      | 21q22.3 21q22.2                       |
|             |                          |          |        |        |                           | <i>WRB</i>        | tryptophan rich basic protein                                                        | 21q22.3                               |
| CH82-362A18 | chr31:36306767-36501061  | 113      | 0.0%   | 20.4%  | chr21:40578774-40791137   | <i>LCA5L</i>      | Leber congenital amaurosis 5-like                                                    | 21q22.2                               |
| CH82-188N02 | chr31:37676109-37882008  | 113      | 0.0%   | 23.0%  | chr21:42164751-42411140   | <i>DSCAM</i>      | Down syndrome cell adhesion molecule                                                 | 21q22.2                               |
|             |                          |          |        |        |                           | <i>ZNF295</i>     | zinc finger protein 295                                                              | 21q22.3                               |
|             |                          |          |        |        |                           | <i>C21orf121</i>  | chromosome 21 open reading frame 121                                                 | 21q22.3                               |
|             |                          |          |        |        |                           | <i>UMODL1</i>     | uromodulin-like 1                                                                    | 21q22.3                               |
|             |                          |          |        |        |                           | <i>C21orf128</i>  | chromosome 21 open reading frame 128                                                 | 21q22.3                               |
| CH82-205C10 | chr31:38695825-38905561  | 113      | 1.8%   | 22.1%  | chr21:43403628-43651726   | <i>ABCG1</i>      | ATP-binding cassette, sub-family G (WHITE), member 1                                 | 21q22.3                               |
|             |                          |          |        |        |                           | <i>C21orf29</i>   | chromosome 21 open reading frame 29                                                  | 21q22.3                               |
|             |                          |          |        |        |                           | <i>C21orf90</i>   | chromosome 21 open reading frame 90                                                  | 21q22.3                               |
|             |                          |          |        |        |                           | <i>KRTAP10-1</i>  | keratin associated protein 10-1                                                      | 21q22.3                               |
|             |                          |          |        |        |                           | <i>KRTAP10-2</i>  | keratin associated protein 10-2                                                      | 21q22.3                               |
|             |                          |          |        |        |                           | <i>KRTAP10-3</i>  | keratin associated protein 10-3                                                      | 21q22.3                               |
|             |                          |          |        |        |                           | <i>KRTAP10-4</i>  | keratin associated protein 10-4                                                      | 21q22.3                               |
|             |                          |          |        |        |                           | <i>KRTAP10-5</i>  | keratin associated protein 10-5                                                      | 21q22.3                               |
|             |                          |          |        |        |                           | <i>KRTAP10-6</i>  | keratin associated protein 10-6                                                      | 21q22.3                               |
|             |                          |          |        |        |                           | <i>KRTAP10-7</i>  | keratin associated protein 10-7                                                      | 21q22.3                               |
|             |                          |          |        |        |                           | <i>KRTAP10-8</i>  | keratin associated protein 10-8                                                      | 21q22.3                               |
|             |                          |          |        |        |                           | <i>KRTAP10-9</i>  | keratin associated protein 10-9                                                      | 21q22.3                               |
|             |                          |          |        |        |                           | <i>KRTAP10-10</i> | keratin associated protein 10-10                                                     | 21q22.3                               |
|             |                          |          |        |        |                           | <i>KRTAP10-11</i> | keratin associated protein 10-11                                                     | 21q22.3                               |
|             |                          |          |        |        |                           | <i>KRTAP12-4</i>  | keratin associated protein 12-4                                                      | 21q22.3                               |
|             |                          |          |        |        |                           | <i>KRTAP12-3</i>  | keratin associated protein 12-3                                                      | 21q22.3                               |
|             |                          |          |        |        |                           | <i>KRTAP12-2</i>  | keratin associated protein 12-2                                                      | 21q22.3                               |
|             |                          |          |        |        |                           | <i>KRTAP12-1</i>  | keratin associated protein 12-1                                                      | 21q22.3                               |
|             |                          |          |        |        |                           | <i>KRTAP10-12</i> | keratin associated protein 10-12                                                     | 21q22.3                               |
| CH82-182M14 | chr31:40609436-40774701  | 110      | 0.9%   | 21.8%  | chr21:45934664-46196115   | <i>UBE2G2</i>     | ubiquitin-conjugating enzyme E2G 2 (UBC7 homolog, yeast)                             | 21q22.3                               |
|             |                          |          |        |        |                           | <i>COL18A1</i>    | collagen, type XVIII, alpha 1                                                        | 21q22.3                               |
| CH82-161M15 | chr31:41245748-41445063  | 112      | 0.9%   | 20.5%  | chr21:46886264-47175836   | <i>SLC19A1</i>    | solute carrier family 19 (folate transporter), member 1                              | 21q22.3                               |
| CH82-197H12 | chr31:42061132-42084242  | 77       | 2.6%   | 31.2%  | chr21:47889964-47921052   | <i>DIP2A</i>      | DIP2 disco-interacting protein 2 homolog A (Drosophila)                              | 21q22.3                               |
| CH82-335G24 | chr36:11322918-11508563  | 108      | 0.0%   | 34.3%  | chr21:163761181-163990785 |                   |                                                                                      |                                       |
| CH82-315N13 | chrX:4382351-4589338     | 107      | 21.5%  | 0.9%   | chrX:7213606-7488068      | <i>STS</i>        | steroid sulfatase (microsomal), isozyme S                                            | Xp22.32                               |
| CH82-126J24 | chrX:66297723-66532843   | 106      | 19.8%  | 33.0%  | nd                        |                   |                                                                                      |                                       |
| CH82-184J03 | chrX:108872756-108912373 | 111      | 11.7%  | 27.0%  | chrX:134417680-134432578  | <i>ZNF75D</i>     | zinc finger protein 75D                                                              | Xq26.3                                |
| CH82-126I09 | chrX:121537613-121744136 | 106      | 0.0%   | 32.1%  | chrX:149356337-149590018  | <i>MAMLD1</i>     | mastermind-like domain containing 1                                                  | Xq28                                  |

Thomas et al. SOM Table IIa
