# Supplementary material
Source: PubMed Central journal article supplement (PMC4304668)
Supplement: NIHMS353590-supplement-SOM_Table_IIb.pdf [file NIHMS353590-supplement-SOM_Table_IIb.pdf]

| Clone ID    | Dog chromosome location  | # scored | % loss | % gain | Human chromosome location | Gene Symbol    | Gene Description                                                                                                      | Human cytogenetic assignment (Entrez) |
|-------------|--------------------------|----------|--------|--------|---------------------------|----------------|-----------------------------------------------------------------------------------------------------------------------|---------------------------------------|
| CH82-122B18 | chr1:6192488-6223577     | 37       | 0.0%   | 24.3%  | chr18:74271000-74317929   |                |                                                                                                                       |                                       |
| CH82-307A01 | chr1:17893120-18105862   | 36       | 0.0%   | 22.2%  | chr18:59339105-59594297   |                |                                                                                                                       |                                       |
| CH82-335H19 | chr1:21035971-21232172   | 37       | 0.0%   | 29.7%  | chr18:55393674-55640478   |                |                                                                                                                       |                                       |
| CH82-191M10 | chr1:52746169-52970660   | 37       | 0.0%   | 21.6%  | chr6:161537941-161807197  |                |                                                                                                                       |                                       |
| CH82-332G05 | chr1:58717706-58950687   | 37       | 8.1%   | 24.3%  | chr6:168585112-168949847  |                |                                                                                                                       |                                       |
| CH82-283P08 | chr1:110563613-110764791 | 37       | 2.7%   | 21.6%  | chr19:48868336-49138020   |                |                                                                                                                       |                                       |
| CH82-197I06 | chr1:111332966-111513895 | 36       | 0.0%   | 22.2%  | chr19:47862268-48084269   |                |                                                                                                                       |                                       |
| CH82-208M24 | chr1:114912588-115137591 | 37       | 2.7%   | 21.6%  | chr19:42611876-42887052   | <b>C1C</b>     | <b>capicua homolog (Drosophila)</b>                                                                                   | 19q13.2                               |
| CH82-213F12 | chr1:115838920-116019438 | 36       | 2.8%   | 25.0%  | chr19:41159171-41406062   |                |                                                                                                                       |                                       |
| CH82-326P06 | chr1:116682793-116868312 | 37       | 0.0%   | 21.6%  | chr19:39734013-39951625   |                |                                                                                                                       |                                       |
| CH82-191O17 | chr1:121518301-121710524 | 37       | 2.7%   | 21.6%  | chr19:33848302-34089081   |                |                                                                                                                       |                                       |
| CH82-262C15 | chr2:86668685-86845909   | 37       | 2.7%   | 37.8%  | chr1:12517135-12722076    |                |                                                                                                                       |                                       |
| CH82-349L24 | chr2:87326057-87550438   | 36       | 8.3%   | 36.1%  | chr1:11573472-11867777    |                |                                                                                                                       |                                       |
| CH82-335M12 | chr3:15867689-16066967   | 36       | 55.6%  | 5.6%   | chr5:95812200-96050078    |                |                                                                                                                       |                                       |
| CH82-335E13 | chr3:24003458-24189037   | 36       | 2.8%   | 22.2%  | chr5:86408994-86630347    |                |                                                                                                                       |                                       |
| CH82-126L20 | chr3:41442419-41673900   | 36       | 61.1%  | 0.0%   | chr15:29527544-29812637   |                |                                                                                                                       |                                       |
| CH82-332A09 | chr3:94312126-94524869   | 37       | 10.8%  | 27.0%  | chr4:735501-1054514       |                |                                                                                                                       |                                       |
| CH82-122G14 | chr4:56773465-56974192   | 37       | 0.0%   | 32.4%  | chr5:155604370-155830692  |                |                                                                                                                       |                                       |
| CH82-335J12 | chr4:9104162-91270051    | 35       | 25.7%  | 0.0%   | chr5:14988134-15230669    |                |                                                                                                                       |                                       |
| CH82-122E24 | chr5:30408016-30612845   | 37       | 24.3%  | 0.0%   | chr11:104298356-104516456 |                |                                                                                                                       |                                       |
| CH82-122N12 | chr5:51970208-52167865   | 37       | 37.8%  | 0.0%   | chr1-61199715-61429342    |                |                                                                                                                       |                                       |
| CH82-122N24 | chr5:60917402-61150345   | 37       | 13.5%  | 21.6%  | chr1-3239231-3535112      | <b>PRDM16</b>  | <b>PR domain containing 16</b>                                                                                        | 1p36.23-p33                           |
| CH82-328O11 | chr6:7679518-7864640     | 37       | 5.4%   | 21.6%  | chr7:67652010-67932596    |                |                                                                                                                       |                                       |
| CH82-330I20 | chr6:8929418-9017250     | 37       | 0.0%   | 27.0%  | chr7:73838836-74089528    |                |                                                                                                                       |                                       |
| CH82-338G09 | chr6:10769537-10958045   | 37       | 2.7%   | 27.0%  | chr7-10176572-103040019   |                |                                                                                                                       |                                       |
| CH82-154P02 | chr6:14823657-15027075   | 36       | 0.0%   | 27.8%  | chr7:6521039-6707105      |                |                                                                                                                       |                                       |
| CH82-313K08 | chr6:16397660-16602041   | 37       | 0.0%   | 24.3%  | chr7:3749332-3979280      |                |                                                                                                                       |                                       |
| CH82-456M11 | chr6:17402036-17587833   | 37       | 0.0%   | 21.6%  | nd                        |                |                                                                                                                       |                                       |
| CH82-311I23 | chr6:18737657-18940686   | 37       | 0.0%   | 45.9%  | chr7:991387-1198121       |                |                                                                                                                       |                                       |
| CH82-335N18 | chr6:21383336-21577538   | 37       | 0.0%   | 21.6%  | nd                        |                |                                                                                                                       |                                       |
| CH82-287E10 | chr6:22193333-22395819   | 37       | 0.0%   | 24.3%  | chr16:27226547-27469020   | <b>IL21R</b>   | <b>interleukin 21 receptor</b>                                                                                        | 16p11                                 |
| CH82-122K24 | chr6:22926270-23121993   | 37       | 0.0%   | 24.3%  | chr16:26282722-26533560   |                |                                                                                                                       |                                       |
| CH82-122C24 | chr6:27299071-27480266   | 37       | 0.0%   | 37.8%  | chr16:20919993-21162553   |                |                                                                                                                       |                                       |
| CH82-323L03 | chr6:27951270-28116661   | 37       | 0.0%   | 21.6%  | chr16:20248149-20440744   |                |                                                                                                                       |                                       |
| CH82-323H01 | chr6:28940939-29133680   | 37       | 0.0%   | 21.6%  | chr16:19079114-19327301   |                |                                                                                                                       |                                       |
| CH82-186D15 | chr6:32688291-32863435   | 37       | 0.0%   | 24.3%  | chr16:13293967-13519694   |                |                                                                                                                       |                                       |
| CH82-332F17 | chr6:41425922-41630205   | 37       | 5.4%   | 29.7%  | chr16:2486665-2774746     |                |                                                                                                                       |                                       |
| CH82-390I08 | chr6:41842424-42061613   | 37       | 8.1%   | 43.2%  | chr16:1945214-2210305     | <b>TSC2</b>    | <b>tuberous sclerosis 2</b>                                                                                           | 16p13.3                               |
| CH82-62F09  | chr6:42226004-42426757   | 37       | 8.1%   | 32.4%  | chr16:1449359-1749740     |                |                                                                                                                       |                                       |
| CH82-289M05 | chr6:43355695-43545693   | 37       | 5.4%   | 21.6%  | chr16:75856-232132        |                |                                                                                                                       |                                       |
| CH82-323B24 | chr6:46340298-46530437   | 36       | 0.0%   | 22.2%  | chr1-108685587-109070133  |                |                                                                                                                       |                                       |
| CH82-126L23 | chr6:47416907-47581966   | 37       | 0.0%   | 35.1%  | chr1-107553676-107732705  |                |                                                                                                                       |                                       |
| CH82-326C24 | chr6:49543064-49757195   | 36       | 13.9%  | 25.0%  | chr1-104621450-104870774  |                |                                                                                                                       |                                       |
| CH82-283F10 | chr6:54314857-54485998   | 36       | 0.0%   | 22.2%  | chr1-98724076-98908760    |                |                                                                                                                       |                                       |
| CH82-325H19 | chr6:80194236-80387266   | 37       | 18.9%  | 27.0%  | chr1-68267044-68615186    |                |                                                                                                                       |                                       |
| CH82-323G10 | chr7:4484908-4675880     | 37       | 8.1%   | 35.1%  | nd                        |                |                                                                                                                       |                                       |
| CH82-313I01 | chr7:16377091-16546973   | 37       | 0.0%   | 35.1%  | chr1:179816448-179993716  |                |                                                                                                                       |                                       |
| CH82-122C02 | chr7:28690031-28879759   | 37       | 0.0%   | 27.0%  | chr1:173148399-173394285  |                |                                                                                                                       |                                       |
| CH82-133B12 | chr7:45230690-45395584   | 37       | 5.4%   | 24.3%  | chr1:155047433-155276375  | <b>MUC1</b>    | <b>mucin 1, cell surface associated</b>                                                                               | 1q21                                  |
| CH82-335B12 | chr7:47644466-47863226   | 37       | 0.0%   | 43.2%  | chr18:43975514-44231745   |                |                                                                                                                       |                                       |
| CH82-335G06 | chr8:13973154-14168780   | 34       | 0.0%   | 20.6%  | chr14:32296992-32518674   |                |                                                                                                                       |                                       |
| CH82-122L09 | chr8:30408877-30630700   | 36       | 0.0%   | 30.6%  | chr14:51512797-51799927   |                |                                                                                                                       |                                       |
| CH82-126L07 | chr8:49781466-49849250   | 37       | 0.0%   | 37.8%  | chr14:73873851-73953989   |                |                                                                                                                       |                                       |
| CH82-182L07 | chr8:75349341-75550584   | 35       | 8.6%   | 37.1%  | chr14:105212288-105550498 | <b>AKT1</b>    | <b>v-akt murine thymoma viral oncogene homolog 1</b>                                                                  | 14q32.32 14q32.32                     |
| CH82-7K11   | chr9:3283814-3479840     | 37       | 8.1%   | 40.5%  | chr17:79678389-79989108   | <b>ASPSCR1</b> | <b>alveolar soft part sarcoma chromosome region, candidate 1</b>                                                      | 17q25.3                               |
| CH82-305C19 | chr9:4647587-4837657     | 36       | 8.3%   | 38.9%  | chr17:77765395-78007897   |                |                                                                                                                       |                                       |
| CH82-506H07 | chr9:5875654-6043431     | 37       | 5.4%   | 27.0%  | chr17:76073413-76330725   |                |                                                                                                                       |                                       |
| CH82-326I12 | chr9:6551183-6752927     | 36       | 5.6%   | 33.3%  | chr17:75112808-75409339   |                |                                                                                                                       |                                       |
| CH82-287E02 | chr9:7511356-7719383     | 37       | 0.0%   | 35.1%  | chr17:73881867-74136891   |                |                                                                                                                       |                                       |
| CH82-188A08 | chr9:8487097-8712792     | 37       | 2.7%   | 32.4%  | chr17:72691617-72964964   |                |                                                                                                                       |                                       |
| CH82-506O04 | chr9:9592075-9793581     | 37       | 8.1%   | 27.0%  | chr17:71426810-71660605   |                |                                                                                                                       |                                       |
| CH82-469J23 | chr9:14490732-14693841   | 37       | 2.7%   | 24.3%  | chr17:61389554-61633350   |                |                                                                                                                       |                                       |
| CH82-191M02 | chr9:16767906-16953199   | 37       | 0.0%   | 21.6%  | chr17:64557497-64806159   |                |                                                                                                                       |                                       |
| CH82-287A03 | chr9:17943769-18148132   | 37       | 2.7%   | 35.1%  | chr17:62949644-63218358   |                |                                                                                                                       |                                       |
| CH82-340P02 | chr9:25364582-25592187   | 37       | 0.0%   | 21.6%  | chr17:38503397-38784192   | <b>RARA</b>    | <b>retinoic acid receptor, alpha</b>                                                                                  | 17q21                                 |
| CH82-501G10 | chr9:26035190-26215342   | 36       | 2.8%   | 25.0%  | chr17:37737064-37943153   | <b>ERBB2</b>   | <b>v-erb-b2 erythroblastic leukemia viral oncogene homolog 2, neuro/glioblastoma derived oncogene homolog (avian)</b> | 17q11.2-q12 17q21.1                   |
| CH82-189K10 | chr9:27749024-27954726   | 37       | 0.0%   | 21.6%  | chr17:46223196-46433748   |                |                                                                                                                       |                                       |
| CH82-326J12 | chr9:28774763-28971614   | 37       | 0.0%   | 21.6%  | chr17:47393482-47623977   |                |                                                                                                                       |                                       |
| CH82-313C13 | chr9:29546702-29749842   | 37       | 2.7%   | 24.3%  | chr17:48299781-48575907   |                |                                                                                                                       |                                       |
| CH82-135P18 | chr9:32248862-32438730   | 37       | 0.0%   | 24.3%  | chr17:51440250-51713293   |                |                                                                                                                       |                                       |
| CH82-323N11 | chr9:35556533-35749937   | 37       | 2.7%   | 24.3%  | chr17:55572263-55788510   | <b>MSI2</b>    | <b>musashi homolog 2 (Drosophila)</b>                                                                                 | 17q22                                 |
| CH82-323B01 | chr9:39739988-39952646   | 37       | 0.0%   | 27.0%  | chr17:34889408-35137580   |                |                                                                                                                       |                                       |
| CH82-191I24 | chr9:41869271-42085377   | 36       | 5.6%   | 25.0%  | chr17:32864405-33108160   |                |                                                                                                                       |                                       |
| CH82-122N06 | chr9:45828531-46020441   | 30       | 10.0%  | 20.0%  | chr17:26465116-26688109   |                |                                                                                                                       |                                       |
| CH82-195P07 | chr9:47028803-47222063   | 36       | 2.8%   | 25.0%  | chr17:27928759-28162298   |                |                                                                                                                       |                                       |
| CH82-438O5  | chr9:48965695-49169481   | 37       | 2.7%   | 35.1%  | chr17:1374865-1607726     |                |                                                                                                                       |                                       |
| CH82-191C16 | chr9:51728581-51921514   | 36       | 11.1%  | 38.9%  | chr9:139949582-140188358  |                |                                                                                                                       |                                       |

| Clone ID    | Dog chromosome location | # scored | % loss | % gain | Human chromosome location | Gene Symbol | Gene Description                                             | Human cytogenetic assignment (Entrez) |
|-------------|-------------------------|----------|--------|--------|---------------------------|-------------|--------------------------------------------------------------|---------------------------------------|
| CH82-328B07 | chr9:55069941-55236256  | 37       | 10.8%  | 27.0%  | chr9:135238338-135441430  |             |                                                              |                                       |
| CH82-126H22 | chr9:59165710-59371881  | 37       | 51.4%  | 5.4%   | chr9:130038258-130308910  |             |                                                              |                                       |
| CH82-323C23 | chr9:60409246-60620851  | 37       | 2.7%   | 27.0%  | chr9:128652708-128896784  |             |                                                              |                                       |
| CH82-188C04 | chr9:62857440-62887128  | 37       | 0.0%   | 32.4%  | chr9:126026593-126058330  |             |                                                              |                                       |
| CH82-506N23 | chr9:64078411-64147422  | 36       | 5.6%   | 27.8%  | chr9:124466914-124539827  |             |                                                              |                                       |
| CH82-398K12 | chr10:4766719-4948859   | 37       | 2.7%   | 21.6%  | chr12:58110640-58311292   | <b>CDK4</b> | <b>cyclin-dependent kinase 4</b>                             | 12q14                                 |
| CH82-122C08 | chr10:23364115-23625893 | 37       | 0.0%   | 21.6%  | chr22:45908870-46198693   |             |                                                              |                                       |
| CH82-122D20 | chr10:30979474-31151498 | 36       | 0.0%   | 30.6%  | chr22:36725725-36903689   | <b>MYH9</b> | <b>myosin, heavy chain 9, non-muscle</b>                     | 22q13.1                               |
| CH82-335K09 | chr10:44476493-44645214 | 37       | 32.4%  | 0.0%   | chr2:102013119-102212353  |             |                                                              |                                       |
| CH82-330P10 | chr10:72197473-72397373 | 36       | 5.6%   | 25.0%  | chr2:70859179-71135120    |             |                                                              |                                       |
| CH82-186B19 | chr11:8928401-9145528   | 37       | 24.3%  | 5.4%   | chr5:115562529-115805207  |             |                                                              |                                       |
| CH82-122L07 | chr11:9362920-9542518   | 37       | 24.3%  | 5.4%   | chr5:116030581-116235057  |             |                                                              |                                       |
| CH82-283K03 | chr11:10542126-10752622 | 37       | 24.3%  | 0.0%   | chr5:117307578-117525785  |             |                                                              |                                       |
| CH82-126B05 | chr11:11844896-12035590 | 37       | 24.3%  | 0.0%   | nd                        |             |                                                              |                                       |
| CH82-328A15 | chr11:12876081-13075538 | 37       | 21.6%  | 0.0%   | chr5:119836983-120081168  |             |                                                              |                                       |
| CH82-326I09 | chr11:13788787-13969984 | 35       | 22.9%  | 0.0%   | nd                        |             |                                                              |                                       |
| CH82-326L11 | chr11:15894670-16095447 | 37       | 27.0%  | 2.7%   | chr5:122366512-122560138  |             |                                                              |                                       |
| CH82-323I05 | chr11:16821154-17005420 | 37       | 29.7%  | 0.0%   | chr5:123368897-123608330  |             |                                                              |                                       |
| CH82-283M14 | chr11:17730891-17930078 | 37       | 29.7%  | 0.0%   | chr5:124465395-124713824  |             |                                                              |                                       |
| CH82-307C07 | chr11:18793287-18972736 | 37       | 29.7%  | 2.7%   | chr5:125831627-126070130  |             |                                                              |                                       |
| CH82-62D11  | chr11:19493280-19727771 | 37       | 29.7%  | 0.0%   | chr5:126708683-126964715  |             |                                                              |                                       |
| CH82-326L05 | chr11:20496756-20706739 | 37       | 32.4%  | 0.0%   | chr5:127808121-128047915  |             |                                                              |                                       |
| CH82-330A20 | chr11:24341825-24533759 | 37       | 21.6%  | 2.7%   | chr5:132409181-132598887  |             |                                                              |                                       |
| CH82-465G11 | chr11:26672686-26878843 | 36       | 25.0%  | 2.8%   | chr5:134976198-135285012  |             |                                                              |                                       |
| CH82-186P04 | chr11:27687472-27890432 | 37       | 24.3%  | 0.0%   | chr5:136241666-136435973  |             |                                                              |                                       |
| CH82-126B13 | chr11:28542375-2875793  | 37       | 24.3%  | 0.0%   | chr5:137155789-137413182  |             |                                                              |                                       |
| CH82-188H11 | chr11:29760129-29985064 | 37       | 24.3%  | 0.0%   | nd                        |             |                                                              |                                       |
| CH82-474K18 | chr11:31861013-32032136 | 35       | 25.7%  | 0.0%   | chr9:7987192-8228156      |             |                                                              |                                       |
| CH82-62G24  | chr11:33181307-33392882 | 37       | 27.0%  | 0.0%   | chr9:9449146-9663817      |             |                                                              |                                       |
| CH82-326P11 | chr11:34247809-34423350 | 37       | 24.3%  | 0.0%   | chr9:10562093-10757698    |             |                                                              |                                       |
| CH82-126A11 | chr11:36523749-36739999 | 35       | 28.6%  | 0.0%   | chr9:12876195-13130779    |             |                                                              |                                       |
| CH82-182A16 | chr11:37999014-38200895 | 37       | 24.3%  | 0.0%   | chr9:14487681-14734319    |             |                                                              |                                       |
| CH82-106N16 | chr11:42425389-42612516 | 37       | 27.0%  | 2.7%   | chr9:19641087-19912562    |             |                                                              |                                       |
| CH82-325C12 | chr11:44256300-44428212 | 36       | 55.6%  | 0.0%   | chr9:21971498-22175227    |             |                                                              |                                       |
| CH82-328B22 | chr11:44781889-44967263 | 35       | 54.3%  | 2.9%   | chr9:22685716-22964798    |             |                                                              |                                       |
| CH82-182K13 | chr11:46963358-47162842 | 37       | 45.9%  | 0.0%   | chr9:25449357-25692162    |             |                                                              |                                       |
| CH82-188A22 | chr11:47987266-48173381 | 37       | 27.0%  | 0.0%   | chr9:26695197-26928914    |             |                                                              |                                       |
| CH82-307I24 | chr11:49854198-50041767 | 37       | 35.1%  | 0.0%   | chr9:28867679-29007017    |             |                                                              |                                       |
| CH82-330P17 | chr11:52968262-53138987 | 37       | 32.4%  | 0.0%   | chr9:32726585-32970532    |             |                                                              |                                       |
| CH82-283A15 | chr11:53688814-53860277 | 37       | 29.7%  | 0.0%   | chr9:33901142-34070014    |             |                                                              |                                       |
| CH82-92B24  | chr11:53904555-54114715 | 37       | 32.4%  | 0.0%   | chr9:34123854-34386805    |             |                                                              |                                       |
| CH82-476B13 | chr11:53941124-54164296 | 37       | 32.4%  | 0.0%   | chr9:34170175-34447457    |             |                                                              |                                       |
| CH82-79I21  | chr11:54029173-54260358 | 35       | 31.4%  | 0.0%   | chr9:34279191-34554509    |             |                                                              |                                       |
| CH82-330N18 | chr11:55104897-55322407 | 37       | 27.0%  | 0.0%   | chr9:35491138-35763995    |             |                                                              |                                       |
| CH82-474I11 | chr11:56633361-56824997 | 37       | 29.7%  | 0.0%   | chr9:37274866-37489328    |             |                                                              |                                       |
| CH82-388J08 | chr11:57981148-58178226 | 37       | 29.7%  | 0.0%   | chr9:100407817-100620444  | <b>XPA</b>  | <b>xeroderma pigmentosum, complementation group A</b>        | 9q22.3                                |
| CH82-326D17 | chr11:59214619-59407273 | 37       | 35.1%  | 0.0%   | chr9:101883496-102109561  |             |                                                              |                                       |
| CH82-182N23 | chr11:60273100-60424472 | 37       | 32.4%  | 0.0%   | chr9:103101979-103260787  |             |                                                              |                                       |
| CH82-326A13 | chr11:61849471-62044977 | 34       | 23.5%  | 0.0%   | chr9:105043328-105347967  |             |                                                              |                                       |
| CH82-323B19 | chr11:62701940-62877297 | 37       | 35.1%  | 0.0%   | chr9:106356737-106560456  |             |                                                              |                                       |
| CH82-188F09 | chr11:64316141-64518503 | 37       | 35.1%  | 2.7%   | chr9:108175680-108433951  | <b>TAL2</b> | <b>T-cell acute lymphocytic leukemia 2</b>                   | 9q32                                  |
| CH82-106A14 | chr11:65115892-65304070 | 37       | 32.4%  | 2.7%   | chr9:109221085-109476991  |             |                                                              |                                       |
| CH82-283N18 | chr11:66075523-66263523 | 37       | 35.1%  | 2.7%   | chr9:110459184-110716227  |             |                                                              |                                       |
| CH82-283G14 | chr11:67213701-67408065 | 36       | 33.3%  | 2.8%   | chr9:111799260-112018268  |             |                                                              |                                       |
| CH82-122K09 | chr11:68337530-68496985 | 37       | 32.4%  | 5.4%   | chr9:113126851-113312950  |             |                                                              |                                       |
| CH82-191N23 | chr11:70086781-70269451 | 37       | 29.7%  | 2.7%   | chr9:115361670-115573042  |             |                                                              |                                       |
| CH82-326O21 | chr11:70854059-71039141 | 37       | 35.1%  | 5.4%   | chr9:116252635-116460224  |             |                                                              |                                       |
| CH82-323L01 | chr11:73128843-73335733 | 37       | 35.1%  | 5.4%   | chr9:119038458-119256051  |             |                                                              |                                       |
| CH82-195D13 | chr11:74425345-74603505 | 37       | 35.1%  | 2.7%   | chr9:120503594-120695547  |             |                                                              |                                       |
| CH82-307H04 | chr11:75956107-76142514 | 37       | 37.8%  | 5.4%   | chr9:122290137-122507523  |             |                                                              |                                       |
| CH82-325L14 | chr11:76880486-77092536 | 35       | 37.1%  | 2.9%   | chr9:123558300-123824031  |             |                                                              |                                       |
| CH82-313C15 | chr12:39896138-40108358 | 37       | 2.7%   | 27.0%  | chr6:75960778-76188621    |             |                                                              |                                       |
| CH82-323K10 | chr13:3427228-3630015   | 36       | 0.0%   | 30.6%  | chr8:99203666-99447163    |             |                                                              |                                       |
| CH82-199F19 | chr13:4523779-4728444   | 37       | 0.0%   | 32.4%  | chr8:100534452-100768630  |             |                                                              |                                       |
| CH82-328M24 | chr13:7158524-7367083   | 37       | 0.0%   | 29.7%  | chr8:103566162-103817007  |             |                                                              |                                       |
| CH82-328P06 | chr13:8630921-8818498   | 37       | 0.0%   | 27.0%  | chr8:105416146-105665885  |             |                                                              |                                       |
| CH82-326G03 | chr13:9888412-10077025  | 37       | 0.0%   | 27.0%  | chr8:106907474-107185416  |             |                                                              |                                       |
| CH82-326M15 | chr13:12747600-12941644 | 37       | 0.0%   | 24.3%  | chr8:110166985-110354298  |             |                                                              |                                       |
| CH82-283A06 | chr13:16014587-16184882 | 36       | 0.0%   | 22.2%  | chr8:113851510-114033215  |             |                                                              |                                       |
| CH82-287A17 | chr13:18430332-18610009 | 37       | 0.0%   | 29.7%  | chr8:116848247-117025497  |             |                                                              |                                       |
| CH82-330I03 | chr13:20482982-20685366 | 36       | 0.0%   | 27.8%  | chr8:119116441-119350685  | <b>EXT1</b> | <b>exostoses (multiple) 1</b>                                | 8q24.11-q24.13                        |
| CH82-262D16 | chr13:21538859-21555255 | 32       | 6.3%   | 37.5%  | chr8:120426594-120442920  |             |                                                              |                                       |
| CH82-323G16 | chr13:22807364-22989452 | 37       | 0.0%   | 27.0%  | chr8:121967753-122173892  |             |                                                              |                                       |
| CH82-340A23 | chr13:23951644-24146914 | 37       | 0.0%   | 29.7%  | chr8:123389860-123653345  |             |                                                              |                                       |
| CH82-287D11 | chr13:25119119-25312498 | 37       | 0.0%   | 29.7%  | chr8:124828505-125119679  |             |                                                              |                                       |
| CH82-326P15 | chr13:26621948-27112706 | 36       | 0.0%   | 30.6%  | chr8:127102413-127363823  |             |                                                              |                                       |
| CH82-335M01 | chr13:28085281-28265714 | 37       | 0.0%   | 29.7%  | chr8:128573757-128787688  | <b>MYC</b>  | <b>v-myc myelocytomatosis viral oncogene homolog (avian)</b> | 8q24.21                               |

| Clone ID    | Dog chromosome location | # scored | % loss | % gain | Human chromosome location | Gene Symbol   | Gene Description                                                     | Human cytogenetic assignment (Entrez) |
|-------------|-------------------------|----------|--------|--------|---------------------------|---------------|----------------------------------------------------------------------|---------------------------------------|
| CH82-62F04  | chr13:30722386-30994067 | 37       | 0.0%   | 29.7%  | chr8:131815675-132071889  |               |                                                                      |                                       |
| CH82-328G19 | chr13:31876659-32068644 | 36       | 0.0%   | 27.8%  | chr8:133252226-133447059  |               |                                                                      |                                       |
| CH82-191A04 | chr13:33701934-33908969 | 36       | 0.0%   | 33.3%  | chr8:135508319-135768362  |               |                                                                      |                                       |
| CH82-326D14 | chr13:34868895-35063636 | 37       | 2.7%   | 27.0%  | chr8:137032607-137268902  |               |                                                                      |                                       |
| CH82-335A13 | chr13:36345852-36533181 | 37       | 0.0%   | 27.0%  | chr8:139004447-139272726  |               |                                                                      |                                       |
| CH82-197D03 | chr13:37210802-37431366 | 37       | 0.0%   | 27.0%  | chr8:140207207-140515208  |               |                                                                      |                                       |
| CH82-186J06 | chr13:38344515-38552798 | 37       | 0.0%   | 29.7%  | chr8:141669136-141928990  |               |                                                                      |                                       |
| CH82-474N05 | chr13:39591321-39781628 | 36       | 13.9%  | 55.6%  | chr8:143456099-143693729  |               |                                                                      |                                       |
| CH82-398P13 | chr13:40762011-40939942 | 37       | 2.7%   | 43.2%  | chr8:145523684-145710479  |               |                                                                      |                                       |
| CH82-323B16 | chr13:41613250-41796345 | 37       | 5.4%   | 35.1%  | chr4:41414665-41631385    |               |                                                                      |                                       |
| CH82-388P03 | chr13:43328496-43501635 | 37       | 0.0%   | 24.3%  | chr4:43567811-43833807    |               |                                                                      |                                       |
| CH82-335O03 | chr13:44317860-44495975 | 37       | 27.0%  | 5.4%   | chr4:44934837-45176721    |               |                                                                      |                                       |
| CH82-186J22 | chr13:45483218-45670474 | 37       | 0.0%   | 24.3%  | chr4:46477999-46722549    |               |                                                                      |                                       |
| CH82-126H01 | chr13:48218868-48435957 | 37       | 0.0%   | 29.7%  | chr4:53334505-53579734    |               |                                                                      |                                       |
| CH82-191B15 | chr13:49339012-49547283 | 37       | 0.0%   | 29.7%  | chr4:54706702-54937099    |               |                                                                      |                                       |
| CH82-524B22 | chr13:49991362-50201827 | 37       | 0.0%   | 29.7%  | chr4:55473043-55723285    | <b>CHIC2</b>  | <b>cysteine-rich hydrophobic domain 2</b>                            | 4q11                                  |
| CH82-186J08 | chr13:50171622-50370090 | 35       | 0.0%   | 28.6%  | chr4:55681327-55940616    | <b>KIT</b>    | <b>v-kit Hardy-Zuckerman 4 feline sarcoma viral oncogene homolog</b> | 4q11-q12                              |
| CH82-330E11 | chr13:51352542-51547357 | 37       | 0.0%   | 29.7%  | chr4:57035548-57256686    |               |                                                                      |                                       |
| CH82-328B19 | chr13:53334697-53537896 | 37       | 0.0%   | 24.3%  | chr4:59317732-59587167    |               |                                                                      |                                       |
| CH82-197F14 | chr13:57193340-57220807 | 37       | 0.0%   | 21.6%  | chr4:63869308-63902557    |               |                                                                      |                                       |
| CH82-43F05  | chr13:59532871-59738541 | 34       | 0.0%   | 23.5%  | chr4:66728642-66970038    |               |                                                                      |                                       |
| CH82-474I05 | chr13:60719125-60914172 | 37       | 0.0%   | 32.4%  | chr4:67967053-68242173    |               |                                                                      |                                       |
| CH82-323O12 | chr13:61972683-62157466 | 35       | 0.0%   | 22.9%  | chr4:70212051-70577710    |               |                                                                      |                                       |
| CH82-340G10 | chr13:63490308-63673646 | 37       | 0.0%   | 29.7%  | chr4:72305759-72523249    |               |                                                                      |                                       |
| CH82-186G02 | chr13:64868824-65056532 | 37       | 7.7%   | 32.4%  | chr4:73989160-74216896    |               |                                                                      |                                       |
| CH82-122Q04 | chr14:28016658-28209743 | 37       | 5.4%   | 21.6%  | chr7:9805474-10068600     |               |                                                                      |                                       |
| CH82-326A01 | chr14:47262829-47446846 | 21       | 9.5%   | 28.6%  | chr7:31855578-32059817    |               |                                                                      |                                       |
| CH82-335J05 | chr14:62910983-63121070 | 37       | 0.0%   | 24.3%  | chr7:121701575-122023670  |               |                                                                      |                                       |
| CH82-340O14 | chr15:10643839-10844148 | 37       | 13.5%  | 21.6%  | chr1:34438374-34705402    |               |                                                                      |                                       |
| CH82-335B14 | chr15:50607472-50807713 | 37       | 27.0%  | 0.0%   | chr4:150399554-150629180  |               |                                                                      |                                       |
| CH82-126K01 | chr15:52464908-52691861 | 37       | 0.0%   | 27.0%  | chr4:152417124-152660757  |               |                                                                      |                                       |
| CH82-186K08 | chr16:4135123-4259796   | 37       | 10.8%  | 29.7%  | chr7:45313227-45635342    |               |                                                                      |                                       |
| CH82-323C15 | chr16:21873338-22060235 | 37       | 21.6%  | 5.4%   | chr7:156008333-156262677  |               |                                                                      |                                       |
| CH82-326F18 | chr16:35225394-35441742 | 34       | 20.6%  | 5.9%   | chr8:31754547-31991994    |               |                                                                      |                                       |
| CH82-106B04 | chr16:41329595-41393895 | 35       | 20.0%  | 2.9%   | chr8:14925502-15001710    |               |                                                                      |                                       |
| CH82-330B21 | chr16:59247831-59452262 | 37       | 21.6%  | 2.7%   | chr8:4127551-4333996      |               |                                                                      |                                       |
| CH82-326D07 | chr17:3201167-3398989   | 36       | 25.0%  | 25.0%  | chr2:253915-574648        |               |                                                                      |                                       |
| CH82-283P14 | chr17:4294064-4471442   | 36       | 22.2%  | 5.6%   | chr2:2326832-2593817      |               |                                                                      |                                       |
| CH82-191F04 | chr17:15316830-15460466 | 37       | 24.3%  | 0.0%   | chr2:16881566-17111647    |               |                                                                      |                                       |
| CH82-283I16 | chr17:16182339-16366149 | 37       | 24.3%  | 0.0%   | chr2:17941094-18217316    |               |                                                                      |                                       |
| CH82-325K13 | chr17:18335211-18548645 | 37       | 24.3%  | 0.0%   | chr2:20550921-20808883    |               |                                                                      |                                       |
| CH82-307H01 | chr17:20383332-20583261 | 37       | 27.0%  | 0.0%   | chr2:22981692-23215059    |               |                                                                      |                                       |
| CH82-326G17 | chr17:22039335-22258253 | 36       | 22.2%  | 0.0%   | chr2:24919881-25185699    | <b>NCOA1</b>  | <b>nuclear receptor coactivator 1</b>                                | 2p23                                  |
| CH82-188J16 | chr17:23478945-23689925 | 35       | 28.6%  | 8.6%   | chr2:26655053-26890338    |               |                                                                      |                                       |
| CH82-313C01 | chr17:24184767-24391514 | 37       | 24.3%  | 2.7%   | chr2:27447250-27693557    |               |                                                                      |                                       |
| CH82-262P10 | chr17:26344826-26568007 | 37       | 27.0%  | 0.0%   | chr2:29659645-29908800    | <b>ALK</b>    | <b>anaplastic lymphoma receptor tyrosine kinase</b>                  | 2p23                                  |
| CH82-106F12 | chr17:27847958-28027639 | 37       | 21.6%  | 0.0%   | chr2:31366251-31593442    |               |                                                                      |                                       |
| CH82-122K20 | chr17:28982145-29182179 | 37       | 24.3%  | 0.0%   | chr2:32881557-33110541    |               |                                                                      |                                       |
| CH82-326C11 | chr17:30440924-30645197 | 36       | 30.6%  | 0.0%   | chr2:34748964-34984973    |               |                                                                      |                                       |
| CH82-186B17 | chr17:32055736-32223347 | 37       | 24.3%  | 2.7%   | chr2:36679662-36899330    |               |                                                                      |                                       |
| CH82-186I14 | chr17:33672639-33854434 | 36       | 22.2%  | 0.0%   | chr2:38701073-38904189    |               |                                                                      |                                       |
| CH82-191D18 | chr17:34789107-34978584 | 37       | 24.3%  | 0.0%   | chr2:39945500-40151332    |               |                                                                      |                                       |
| CH82-186H22 | chr17:38024239-38197534 | 37       | 24.3%  | 0.0%   | nd                        |               |                                                                      |                                       |
| CH82-182O14 | chr17:39591770-39757781 | 37       | 24.3%  | 0.0%   | chr2:112838998-113055255  |               |                                                                      |                                       |
| CH82-328H24 | chr17:41682805-41867802 | 37       | 21.6%  | 0.0%   | chr2:86574709-86770264    |               |                                                                      |                                       |
| CH82-326I14 | chr17:42396455-42564074 | 35       | 28.6%  | 2.9%   | chr2:85805044-85928311    |               |                                                                      |                                       |
| CH82-29C12  | chr18:3165579-3338536   | 35       | 8.6%   | 20.0%  | chr7:48311415-48663846    |               |                                                                      |                                       |
| CH82-521K12 | chr18:28514173-28761057 | 37       | 13.5%  | 21.6%  | chr11:374100-713014       | <b>HRAS</b>   | <b>v-Ha-ras Harvey rat sarcoma viral oncogene homolog</b>            | 11p15.5                               |
| CH82-262J20 | chr18:55960626-56134909 | 36       | 30.6%  | 13.9%  | chr11:63671171-63876238   |               |                                                                      |                                       |
| CH82-505N10 | chr18:57840840-58040709 | 37       | 21.6%  | 5.4%   | chr11:61169552-61412446   |               |                                                                      |                                       |
| CH82-62G21  | chr19:18490969-18662730 | 37       | 2.7%   | 21.6%  | chr4:125878721-126053075  |               |                                                                      |                                       |
| CH82-126B07 | chr19:23048111-23209007 | 33       | 36.4%  | 9.1%   | nd                        |               |                                                                      |                                       |
| CH82-199B04 | chr20:3144250-3336975   | 29       | 0.0%   | 24.1%  | chr3:125725196-125857468  |               |                                                                      |                                       |
| CH82-330M07 | chr20:3901610-4082900   | 37       | 0.0%   | 24.3%  | chr3:126454224-126641673  |               |                                                                      |                                       |
| CH82-10D09  | chr20:6200376-6400035   | 36       | 2.8%   | 30.6%  | chr3:12926516-13106904    |               |                                                                      |                                       |
| CH82-332N14 | chr20:7004220-72122600  | 36       | 2.8%   | 27.8%  | chr3:13760935-14093772    |               |                                                                      |                                       |
| CH82-191P11 | chr20:8162608-8353267   | 36       | 0.0%   | 27.8%  | nd                        |               |                                                                      |                                       |
| CH82-397A23 | chr20:8833845-9009664   | 37       | 0.0%   | 27.0%  | chr3:12596891-12788716    | <b>RAF1</b>   | <b>v-raf-1 murine leukemia viral oncogene homolog 1</b>              | 3p25                                  |
| CH82-335E11 | chr20:9093097-9273156   | 37       | 0.0%   | 24.3%  | chr3:12325450-12527804    | <b>PPARG</b>  | <b>peroxisome proliferator-activated receptor gamma</b>              | 3p25                                  |
| CH82-332F13 | chr20:10314881-10478254 | 37       | 0.0%   | 27.0%  | chr3:10941677-11124671    |               |                                                                      |                                       |
| CH82-126F23 | chr20:11244176-11434550 | 37       | 0.0%   | 32.4%  | chr3:9861444-10142042     | <b>FANCD2</b> | <b>Fanconi anemia, complementation group D2</b>                      | 3p26                                  |
| CH82-307I05 | chr20:12257327-12437631 | 36       | 0.0%   | 27.8%  | chr3:8704136-8934115      |               |                                                                      |                                       |
| CH82-115I17 | chr20:13618034-13850791 | 37       | 0.0%   | 29.7%  | chr3:7135698-7369140      |               |                                                                      |                                       |
| CH82-189M06 | chr20:15720120-15923621 | 35       | 0.0%   | 31.4%  | chr3:4700884-4919211      |               |                                                                      |                                       |
| CH82-313Q05 | chr20:17718174-17883871 | 37       | 2.7%   | 31.8%  | chr3:2548857-2735803      |               |                                                                      |                                       |
| CH82-330N23 | chr20:19799780-20008746 | 35       | 0.0%   | 28.6%  | chr3:213207-440964        |               |                                                                      |                                       |
| CH82-313K09 | chr20:20668164-20834697 | 37       | 0.0%   | 24.3%  | chr3:74529235-74695752    |               |                                                                      |                                       |

| Clone ID    | Dog chromosome location | # scored | % loss | % gain | Human chromosome location | Gene Symbol    | Gene Description                                                                                         | Human cytogenetic assignment (Entrez) |
|-------------|-------------------------|----------|--------|--------|---------------------------|----------------|----------------------------------------------------------------------------------------------------------|---------------------------------------|
| CH82-186E23 | chr20:21658276-21875966 | 37       | 0.0%   | 29.7%  | chr3:73413681-73641325    |                |                                                                                                          |                                       |
| CH82-126D04 | chr20:23029047-23208984 | 36       | 0.0%   | 33.3%  | chr3:71880169-72098381    |                |                                                                                                          |                                       |
| CH82-308B21 | chr20:23852137-24064129 | 36       | 0.0%   | 25.0%  | chr3:70989901-71179922    | <b>FOXP1</b>   | <b>forkhead box P1</b>                                                                                   |                                       |
| CH82-328G06 | chr20:24442971-24611167 | 37       | 0.0%   | 21.6%  | chr3:70297890-70516549    |                |                                                                                                          | 3p14.1                                |
| CH82-326E02 | chr20:25919192-26123804 | 36       | 0.0%   | 27.8%  | chr3:68599235-68824130    |                |                                                                                                          |                                       |
| CH82-326B04 | chr20:26735251-26914950 | 37       | 0.0%   | 27.0%  | chr3:67702149-67925406    |                |                                                                                                          |                                       |
| CH82-465J12 | chr20:27883696-28077793 | 35       | 0.0%   | 31.4%  | chr3:66381821-66599802    |                |                                                                                                          |                                       |
| CH82-43N06  | chr20:30069827-30263576 | 36       | 0.0%   | 30.6%  | chr3:63946970-64149074    |                |                                                                                                          |                                       |
| CH82-287P02 | chr20:30879751-31085369 | 36       | 0.0%   | 27.8%  | chr3:62993780-63251454    |                |                                                                                                          |                                       |
| CH82-326E08 | chr20:32054574-32243103 | 37       | 0.0%   | 24.3%  | chr3:61797258-61988092    |                |                                                                                                          |                                       |
| CH82-313B12 | chr20:33015633-33203600 | 37       | 0.0%   | 21.6%  | chr3:60683871-60891773    |                |                                                                                                          |                                       |
| CH82-330C22 | chr20:34378206-34586424 | 37       | 0.0%   | 29.7%  | chr3:59140056-59399519    |                |                                                                                                          |                                       |
| CH82-191A07 | chr20:36521076-36681874 | 37       | 0.0%   | 29.7%  | chr3:56694546-56870315    |                |                                                                                                          |                                       |
| CH82-283D08 | chr20:37508675-37684858 | 37       | 0.0%   | 32.4%  | chr3:55599537-55792885    |                |                                                                                                          |                                       |
| CH82-283O13 | chr20:38803526-38998514 | 36       | 0.0%   | 27.8%  | chr3:54069992-54289308    |                |                                                                                                          |                                       |
| CH82-320D03 | chr20:40178327-40372988 | 36       | 2.8%   | 36.1%  | chr3:52420229-52631580    |                |                                                                                                          |                                       |
| CH82-313B16 | chr20:40862782-41039499 | 37       | 0.0%   | 29.7%  | chr3:51620433-51846942    |                |                                                                                                          |                                       |
| CH82-287E13 | chr20:41988099-42196399 | 37       | 2.7%   | 35.1%  | chr3:50159395-50407287    |                |                                                                                                          |                                       |
| CH82-332L12 | chr20:43028069-43253372 | 37       | 0.0%   | 27.0%  | chr3:48922261-49207828    |                |                                                                                                          |                                       |
| CH82-199P08 | chr20:44212695-44392773 | 37       | 0.0%   | 32.4%  | chr3:47562257-47764195    |                |                                                                                                          |                                       |
| CH82-188I04 | chr20:47981654-48139506 | 37       | 2.7%   | 24.3%  | chr19:17855591-18051996   | <b>JAK3</b>    | <b>Janus kinase 3</b>                                                                                    | 19p13.1                               |
| CH82-441L12 | chr20:48893805-49071619 | 36       | 0.0%   | 33.3%  | chr19:16578834-16779577   |                |                                                                                                          |                                       |
| CH82-121P22 | chr20:51313805-51514349 | 36       | 2.8%   | 38.9%  | chr19:14081154-14366558   |                |                                                                                                          |                                       |
| CH82-388I10 | chr20:52810296-53016830 | 37       | 0.0%   | 29.7%  | chr19:11395219-11692716   |                |                                                                                                          |                                       |
| CH82-437E10 | chr20:53858483-54044482 | 35       | 0.0%   | 25.7%  | chr19:10117021-10342080   |                |                                                                                                          |                                       |
| CH82-505F20 | chr20:55021489-55218901 | 36       | 0.0%   | 30.6%  | chr19:7114450-7441809     |                |                                                                                                          |                                       |
| CH82-188F14 | chr20:55519810-55691749 | 37       | 0.0%   | 32.4%  | chr19:7872481-8073626     |                |                                                                                                          |                                       |
| CH82-14F21  | chr20:56926492-57114495 | 35       | 0.0%   | 34.3%  | chr19:5879022-6141243     |                |                                                                                                          |                                       |
| CH82-323H09 | chr20:58049564-58236564 | 37       | 0.0%   | 27.0%  | chr19:4383592-4646162     | <b>SH3GL1</b>  | <b>SH3-domain GRB2-like 1</b>                                                                            | 19p13.3                               |
| CH82-283N16 | chr20:59485985-59697858 | 37       | 2.7%   | 27.0%  | chr19:2582291-2868402     |                |                                                                                                          |                                       |
| CH82-136N17 | chr20:59847172-60084905 | 37       | 2.7%   | 27.0%  | chr19:2079791-2369914     |                |                                                                                                          |                                       |
| CH82-325G21 | chr20:60892993-61088125 | 35       | 2.9%   | 42.9%  | chr19:582910-922007       | <b>FSTL3</b>   | <b>folliculin-like 3 (secreted glycoprotein)</b>                                                         | 19p13                                 |
| CH82-313B08 | chr21:24523550-24708525 | 35       | 2.9%   | 20.0%  | chr11:76737157-76927331   |                |                                                                                                          |                                       |
| CH82-326G10 | chr22:4453752-4640330   | 36       | 22.2%  | 0.0%   | chr13:50800516-50973919   |                |                                                                                                          |                                       |
| CH82-126K03 | chr22:6667906-6872711   | 32       | 21.9%  | 18.8%  | chr13:48011064-48228965   |                |                                                                                                          |                                       |
| CH82-309B16 | chr22:15820534-16003362 | 23       | 39.1%  | 0.0%   | chr13:56941913-57235025   |                |                                                                                                          |                                       |
| CH82-126A16 | chr22:17520548-17718546 | 36       | 22.2%  | 2.8%   | chr13:59076979-59320717   |                |                                                                                                          |                                       |
| CH82-126F09 | chr22:28164041-28355875 | 36       | 22.2%  | 0.0%   | chr13:71452477-71674245   |                |                                                                                                          |                                       |
| CH82-326E15 | chr22:30133741-30331549 | 37       | 21.6%  | 2.7%   | chr13:73655111-73883988   |                |                                                                                                          |                                       |
| CH82-330P21 | chr22:30775835-30962341 | 37       | 24.3%  | 2.7%   | chr13:74408559-74597058   |                |                                                                                                          |                                       |
| CH82-186F08 | chr22:36467429-36690048 | 32       | 21.9%  | 0.0%   | chr13:81127346-81444481   |                |                                                                                                          |                                       |
| CH82-326H10 | chr22:39772492-39975068 | 37       | 29.7%  | 0.0%   | chr13:84976498-85237493   |                |                                                                                                          |                                       |
| CH82-106O04 | chr22:40773104-40960928 | 37       | 21.6%  | 0.0%   | chr13:86289042-86482338   |                |                                                                                                          |                                       |
| CH82-308J14 | chr22:45186978-45342118 | 37       | 27.0%  | 2.7%   | chr13:91735822-91878173   |                |                                                                                                          |                                       |
| CH82-191D20 | chr22:47472902-47709266 | 37       | 24.3%  | 10.8%  | chr13:94292830-94564541   |                |                                                                                                          |                                       |
| CH82-328D06 | chr22:48483858-48677892 | 35       | 22.9%  | 5.7%   | chr13:95399049-95633774   |                |                                                                                                          |                                       |
| CH82-328B21 | chr22:49685677-49879456 | 36       | 22.2%  | 0.0%   | chr13:96866518-97088094   |                |                                                                                                          |                                       |
| CH82-126A09 | chr22:51127440-51293460 | 36       | 22.2%  | 5.6%   | chr13:98672824-98856162   |                |                                                                                                          |                                       |
| CH82-332K18 | chr22:60023448-60206811 | 37       | 21.6%  | 5.4%   | chr13:108968264-109204031 |                |                                                                                                          |                                       |
| CH82-126B04 | chr22:61273708-61511767 | 37       | 21.6%  | 8.1%   | chr13:110546259-110860994 |                |                                                                                                          |                                       |
| CH82-199L08 | chr23:31284498-31470504 | 37       | 21.6%  | 0.0%   | chr13:130735270-130961415 |                |                                                                                                          |                                       |
| CH82-126H16 | chr24:11140333-11288710 | 37       | 0.0%   | 32.4%  | chr20:14387616-14544438   |                |                                                                                                          |                                       |
| CH82-182B05 | chr24:49428264-49626425 | 37       | 8.1%   | 45.9%  | chr20:60988628-61343858   |                |                                                                                                          |                                       |
| CH82-315H13 | chr25:38113899-38309159 | 37       | 21.6%  | 0.0%   | chr8:21784459-21984110    |                |                                                                                                          |                                       |
| CH82-189L10 | chr25:54267103-54459965 | 36       | 8.3%   | 25.0%  | chr2:242277058-242620575  |                |                                                                                                          |                                       |
| CH82-326A11 | chr26:8374834-8618120   | 36       | 5.6%   | 22.2%  | chr12:124669059-124963309 |                |                                                                                                          |                                       |
| CH82-197E07 | chr26:16599392-16783033 | 36       | 0.0%   | 22.2%  | chr12:117407679-117614137 |                |                                                                                                          |                                       |
| CH82-313E03 | chr26:21358469-21397762 | 36       | 0.0%   | 27.8%  | chr12:108874909-108931568 |                |                                                                                                          |                                       |
| CH82-328P24 | chr26:27066446-27252958 | 37       | 0.0%   | 24.3%  | chr22:31424642-31652570   |                |                                                                                                          |                                       |
| CH82-186N21 | chr26:31607462-31801921 | 37       | 0.0%   | 27.0%  | chr22:24118403-24285242   | <b>SMARCB1</b> | <b>SWI/SNF related, matrix associated, actin dependent regulator of chromatin, subfamily b, member 1</b> | 22q11.23 22q11                        |
| CH82-330E15 | chr26:32454852-32663606 | 37       | 5.4%   | 21.6%  | chr22:319678784-19908344  |                |                                                                                                          |                                       |
| CH82-122I22 | chr27:5962435-6181083   | 37       | 27.0%  | 2.7%   | chr12:52199931-52440410   |                |                                                                                                          |                                       |
| CH82-328I02 | chr27:16163484-16258720 | 35       | 48.6%  | 11.4%  | chr12:40807684-40854854   |                |                                                                                                          |                                       |
| CH82-335J10 | chr27:29995092-30168051 | 37       | 29.7%  | 0.0%   | chr12:20216116-20414056   |                |                                                                                                          |                                       |
| CH82-335L19 | chr27:32656118-32857697 | 37       | 2.7%   | 24.3%  | chr12:17104133-17349826   |                |                                                                                                          |                                       |
| CH82-122O19 | chr28:10668800-10836804 | 37       | 21.6%  | 2.7%   | chr10:95146224-95370698   |                |                                                                                                          |                                       |
| CH82-362C04 | chr28:37212125-37401678 | 37       | 24.3%  | 2.7%   | chr10:126622006-126833358 |                |                                                                                                          |                                       |
| CH82-323B11 | chr28:40886286-41087501 | 37       | 21.6%  | 0.0%   | chr10:130986739-131204303 |                |                                                                                                          |                                       |
| CH82-325O03 | chr28:43088385-43280642 | 37       | 21.6%  | 29.7%  | chr10:133865970-134155938 |                |                                                                                                          |                                       |
| CH82-184A16 | chr29:3083718-3274149   | 37       | 0.0%   | 29.7%  | chr8:48731266-48893362    |                |                                                                                                          |                                       |
| CH82-287E21 | chr29:4234872-4424045   | 37       | 0.0%   | 27.0%  | chr8:49902412-50123371    |                |                                                                                                          |                                       |
| CH82-323F17 | chr29:7694518-7875661   | 36       | 0.0%   | 25.0%  | chr8:53756872-53949771    |                |                                                                                                          |                                       |
| CH82-335H02 | chr29:9633231-9804796   | 37       | 0.0%   | 29.7%  | chr8:56004716-56170069    |                |                                                                                                          |                                       |
| CH82-186K24 | chr29:11056424-11217103 | 37       | 0.0%   | 35.1%  | chr8:57708443-57903235    |                |                                                                                                          |                                       |
| CH82-14M12  | chr29:11993531-12163081 | 35       | 0.0%   | 34.3%  | chr8:59046913-59233297    |                |                                                                                                          |                                       |
| CH82-186L04 | chr29:12819188-13097576 | 37       | 0.0%   | 40.5%  | chr8:60099048-60288616    |                |                                                                                                          |                                       |
| CH82-312I02 | chr29:13618057-13802817 | 37       | 2.7%   | 40.5%  | chr8:61009411-61243838    |                |                                                                                                          |                                       |

| Clone ID    | Dog chromosome location | # scored | % loss | % gain | Human chromosome location | Gene Symbol                                     | Gene Description | Human cytogenetic assignment (Entrez) |
|-------------|-------------------------|----------|--------|--------|---------------------------|-------------------------------------------------|------------------|---------------------------------------|
| CH82-323K08 | chr29:14622563-14833432 | 37       | 5.4%   | 40.5%  | chr8:62175093-62433769    |                                                 |                  |                                       |
| CH82-126F14 | chr29:16100252-16297400 | 37       | 2.7%   | 43.2%  | chr8:63866886-64142271    |                                                 |                  |                                       |
| CH82-313O22 | chr29:16852524-17055678 | 37       | 2.7%   | 37.8%  | chr8:64800376-65025232    |                                                 |                  |                                       |
| CH82-326L03 | chr29:17828601-18018126 | 37       | 0.0%   | 35.1%  | chr8:65965857-66202007    |                                                 |                  |                                       |
| CH82-126F15 | chr29:21252970-21460451 | 37       | 2.7%   | 32.4%  | chr8:69786666-70031231    |                                                 |                  |                                       |
| CH82-326I23 | chr29:22513735-22699487 | 37       | 0.0%   | 37.8%  | chr8:71284807-71516424    |                                                 |                  |                                       |
| CH82-328H09 | chr29:25727982-25904378 | 36       | 2.8%   | 36.1%  | chr8:75174568-75393390    |                                                 |                  |                                       |
| CH82-325D10 | chr29:26683636-26913366 | 37       | 2.7%   | 40.5%  | chr8:76323204-76638495    |                                                 |                  |                                       |
| CH82-191K08 | chr29:28327571-28557660 | 36       | 2.8%   | 30.6%  | chr8:78358423-78633145    |                                                 |                  |                                       |
| CH82-122J15 | chr29:29602914-29782784 | 37       | 0.0%   | 32.4%  | chr8:79933266-80183709    |                                                 |                  |                                       |
| CH82-484E08 | chr29:30017710-30207186 | 37       | 0.0%   | 40.5%  | chr8:80452986-80701280    |                                                 |                  |                                       |
| CH82-330F20 | chr29:31039105-31239831 | 37       | 2.7%   | 43.2%  | chr8:81707127-81914953    |                                                 |                  |                                       |
| CH82-106H09 | chr29:32308350-32504845 | 37       | 2.7%   | 35.1%  | chr8:83192551-83389790    |                                                 |                  |                                       |
| CH82-191F18 | chr29:32966067-33125212 | 37       | 0.0%   | 27.0%  | chr8:84035294-84221223    |                                                 |                  |                                       |
| CH82-323J24 | chr29:34089937-34252905 | 37       | 0.0%   | 35.1%  | chr8:85404014-85569621    |                                                 |                  |                                       |
| CH82-328L16 | chr29:35327223-35497728 | 36       | 2.8%   | 38.9%  | chr8:87092987-87343610    |                                                 |                  |                                       |
| CH82-328F07 | chr29:37500720-37709838 | 36       | 2.8%   | 30.6%  | chr8:89739611-90008338    |                                                 |                  |                                       |
| CH82-326A07 | chr29:38366293-38555732 | 36       | 0.0%   | 38.9%  | chr8:90898911-91093524    |                                                 |                  |                                       |
| CH82-314P02 | chr29:39301421-39482179 | 36       | 0.0%   | 38.9%  | chr8:91957016-92112980    |                                                 |                  |                                       |
| CH82-62K23  | chr29:39904804-40101226 | 37       | 0.0%   | 40.5%  | chr8:92644487-92917555    |                                                 |                  |                                       |
| CH82-188D01 | chr29:41461463-41665840 | 37       | 67.6%  | 5.4%   | chr8:94545807-94799474    |                                                 |                  |                                       |
| CH82-323E02 | chr29:42277116-42468869 | 37       | 0.0%   | 40.5%  | chr8:95602167-95836968    |                                                 |                  |                                       |
| CH82-126G10 | chr30:10886976-11084926 | 35       | 20.0%  | 2.9%   | chr15:41049359-41263385   |                                                 |                  |                                       |
| CH82-335E14 | chr30:38212191-38384443 | 37       | 0.0%   | 32.4%  | chr15:71906712-72114219   |                                                 |                  |                                       |
| CH82-491G03 | chr30:41567655-41755083 | 37       | 18.0%  | 21.6%  | chr15:77881277-78104451   |                                                 |                  |                                       |
| CH82-328N08 | chr31:10637711-10830815 | 37       | 0.0%   | 21.6%  | chr3:79442690-79629187    |                                                 |                  |                                       |
| CH82-328N02 | chr31:14197845-14392011 | 37       | 0.0%   | 21.6%  | chr21:15576483-15758359   |                                                 |                  |                                       |
| CH82-195C18 | chr31:17493037-17686738 | 35       | 0.0%   | 20.0%  | chr21:19501192-19719098   |                                                 |                  |                                       |
| CH82-79I10  | chr31:18603440-18815254 | 36       | 0.0%   | 22.2%  | chr21:20791371-21043655   |                                                 |                  |                                       |
| CH82-323A09 | chr31:25338763-25546225 | 37       | 0.0%   | 29.7%  | chr21:28370959-28597956   |                                                 |                  |                                       |
| CH82-181E06 | chr31:29152367-29376466 | 37       | 0.0%   | 21.6%  | chr21:32575131-32833226   |                                                 |                  |                                       |
| CH82-191I12 | chr31:29947115-30119010 | 37       | 0.0%   | 24.3%  | chr21:33507554-33701844   |                                                 |                  |                                       |
| CH82-309P19 | chr31:31123435-31311223 | 36       | 0.0%   | 25.0%  | chr21:34857456-35070402   |                                                 |                  |                                       |
| CH82-197B21 | chr31:32547604-32755647 | 37       | 0.0%   | 29.7%  | chr21:36433856-36682123   |                                                 |                  |                                       |
| CH82-188I19 | chr31:33318883-33499903 | 37       | 0.0%   | 24.3%  | chr21:37318098-37450143   |                                                 |                  |                                       |
| CH82-335D04 | chr31:34189674-34368957 | 37       | 0.0%   | 35.1%  | chr21:38258236-38466654   |                                                 |                  |                                       |
| CH82-330Q21 | chr31:35133151-35336638 | 37       | 0.0%   | 29.7%  | chr21:39290645-39488665   |                                                 |                  |                                       |
| CH82-362A18 | chr31:36306767-36501061 | 37       | 0.0%   | 24.3%  | chr21:40578774-40791137   |                                                 |                  |                                       |
| CH82-188N02 | chr31:37676109-37882008 | 37       | 0.0%   | 27.0%  | chr21:42164751-42411140   |                                                 |                  |                                       |
| CH82-205C10 | chr31:38695825-38905561 | 37       | 2.7%   | 32.4%  | chr21:43403628-43651726   |                                                 |                  |                                       |
| CH82-182M14 | chr31:40609436-40774701 | 36       | 5.6%   | 22.2%  | chr21:45934664-46196115   |                                                 |                  |                                       |
| CH82-161M15 | chr31:41245748-41445063 | 37       | 2.7%   | 29.7%  | chr21:46886264-47175836   |                                                 |                  |                                       |
| CH82-197H12 | chr31:42061132-42084242 | 31       | 0.0%   | 25.8%  | chr21:47889964-47921052   |                                                 |                  |                                       |
| CH82-335A09 | chr32:11012143-11207843 | 37       | 0.0%   | 27.0%  | chr4:85206508-85405383    |                                                 |                  |                                       |
| CH82-335L09 | chr33:3201681-3387833   | 35       | 2.9%   | 34.3%  | chr3:88421711-88660390    |                                                 |                  |                                       |
| CH82-335F20 | chr33:7218463-7406125   | 37       | 24.3%  | 0.0%   | chr3:96851744-97081923    |                                                 |                  |                                       |
| CH82-335J09 | chr33:26526576-26712986 | 37       | 21.6%  | 5.4%   | chr3:119581409-119816945  |                                                 |                  |                                       |
| CH82-335I16 | chr34:17395866-17613087 | 37       | 2.7%   | 21.6%  | chr3:180894273-181142097  |                                                 |                  |                                       |
| CH82-191D11 | chr36:4119329-4286935   | 37       | 2.7%   | 27.0%  | chr2:155267297-155474799  |                                                 |                  |                                       |
| CH82-126E06 | chr36:4854221-5014991   | 37       | 2.7%   | 24.3%  | chr2:156338171-156527215  |                                                 |                  |                                       |
| CH82-205B13 | chr36:5861455-6039060   | 36       | 2.8%   | 33.3%  | chr2:157529848-157747297  |                                                 |                  |                                       |
| CH82-326K05 | chr36:9502729-9697668   | 37       | 0.0%   | 27.0%  | chr2:161747149-161958312  |                                                 |                  |                                       |
| CH82-287K01 | chr36:10383239-10579479 | 36       | 0.0%   | 36.1%  | chr2:162822527-163020917  |                                                 |                  |                                       |
| CH82-335G24 | chr36:11322918-11508563 | 36       | 0.0%   | 25.0%  | chr2:163761181-163990785  |                                                 |                  |                                       |
| CH82-313H18 | chr36:12287074-12478420 | 37       | 0.0%   | 35.1%  | chr2:164871690-165090260  |                                                 |                  |                                       |
| CH82-335N09 | chr36:13707723-13911360 | 36       | 0.0%   | 27.8%  | chr2:166362266-166607258  |                                                 |                  |                                       |
| CH82-330F23 | chr36:14418057-14601327 | 37       | 0.0%   | 24.3%  | chr2:167193035-167389481  |                                                 |                  |                                       |
| CH82-332J12 | chr36:16052595-16227580 | 37       | 0.0%   | 24.3%  | chr2:168982359-169177217  |                                                 |                  |                                       |
| CH82-186L12 | chr36:16602889-16822655 | 37       | 0.0%   | 32.4%  | chr2:169610313-169855861  |                                                 |                  |                                       |
| CH82-362P01 | chr36:18365962-18563705 | 37       | 0.0%   | 29.7%  | chr2:171671651-171868093  |                                                 |                  |                                       |
| CH82-188B08 | chr36:19726329-19893588 | 37       | 0.0%   | 29.7%  | chr2:173217252-173413578  |                                                 |                  |                                       |
| CH82-205N21 | chr36:20959683-21140453 | 37       | 0.0%   | 32.4%  | chr2:174667906-174874306  |                                                 |                  |                                       |
| CH82-326I02 | chr36:22233408-22434804 | 33       | 0.0%   | 33.3%  | chr2:176127949-176380342  |                                                 |                  |                                       |
| CH82-188B19 | chr36:24784198-25021727 | 36       | 0.0%   | 30.6%  | chr2:178983591-179228625  |                                                 |                  |                                       |
| CH82-335L10 | chr36:25648504-25871279 | 37       | 0.0%   | 35.1%  | chr2:179909543-180205511  |                                                 |                  |                                       |
| CH82-126D12 | chr36:28878020-29048321 | 36       | 2.8%   | 30.6%  | chr2:183664438-183850855  |                                                 |                  |                                       |
| CH82-326O07 | chr36:29954665-30152248 | 36       | 0.0%   | 22.2%  | chr2:185058299-185291824  |                                                 |                  |                                       |
| CH82-188L14 | chr36:31547410-31729319 | 34       | 0.0%   | 23.5%  | chr2:187057192-187321791  |                                                 |                  |                                       |
| CH82-328L10 | chr36:32386641-32578362 | 36       | 2.8%   | 25.0%  | chr2:18824084-188473892   |                                                 |                  |                                       |
| CH82-323N12 | chr36:33672986-33831456 | 37       | 0.0%   | 29.7%  | chr2:190009821-190216143  |                                                 |                  |                                       |
| CH82-186I06 | chr37:15295313-15341308 | 37       | 0.0%   | 21.6%  | chr2:204313947-204356979  |                                                 |                  |                                       |
| CH82-122D22 | chr37:17797277-17969185 | 37       | 2.7%   | 24.3%  | chr2:207099416-207287328  |                                                 |                  |                                       |
| CH82-191P21 | chr38:4006509-4209482   | 37       | 2.7%   | 24.3%  | chr1:204427413-204638490  |                                                 |                  |                                       |
| CH82-313F14 | chr38:11977641-12180890 | 36       | 22.2%  | 5.6%   | chr1:189270854-189520913  |                                                 |                  |                                       |
| CH82-307K12 | chr38:12820932-12993661 | 36       | 22.2%  | 5.6%   | chr1:188214552-188433196  |                                                 |                  |                                       |
| CH82-122E23 | chr38:14283868-14500378 | 31       | 22.6%  | 9.7%   | chr1:216048327-216281804  |                                                 |                  |                                       |
| CH82-122K05 | chr38:16048359-16219112 | 37       | 27.0%  | 5.4%   | chr1:218059518-218276635  |                                                 |                  |                                       |
|             |                         |          |        |        | <b>MDM4</b>               | <b>Mdm4 p53 binding protein homolog (mouse)</b> |                  | 1q32                                  |

| Clone ID    | Dog chromosome location  | # scored | % loss | % gain | Human chromosome location | Gene Symbol   | Gene Description                                             | Human cytogenetic assignment (Entrez) |
|-------------|--------------------------|----------|--------|--------|---------------------------|---------------|--------------------------------------------------------------|---------------------------------------|
| CH82-465H08 | chr38:16739980-16926449  | 37       | 27.0%  | 2.7%   | chr1:218892467-219122824  |               |                                                              |                                       |
| CH82-126D23 | chr38:17789937-17957237  | 37       | 27.0%  | 5.4%   | chr1:220174663-220357159  |               |                                                              |                                       |
| CH82-465E12 | chr38:18965987-19161116  | 36       | 27.8%  | 5.6%   | chr1:221568796-221824332  |               |                                                              |                                       |
| CH82-182D13 | chr38:20156017-20370321  | 37       | 29.7%  | 2.7%   | chr1:166036813-166340889  |               |                                                              |                                       |
| CH82-328C16 | chr38:21638541-21840348  | 37       | 27.0%  | 2.7%   | chr1:164347203-164598605  | <b>PBX1</b>   | <b>pre-B-cell leukemia homeobox 1</b>                        | 1q23                                  |
| CH82-283L06 | chr38:22474724-22638988  | 37       | 29.7%  | 2.7%   | chr1:163228114-163431132  |               |                                                              |                                       |
| CH82-326D12 | chr38:23819476-24017707  | 37       | 29.7%  | 2.7%   | chr1:161628277-161826899  | <b>FCGR2B</b> | <b>Fc fragment of IgG, low affinity IIB, receptor (CD32)</b> | 1q23                                  |
| CH82-328D10 | chr38:25164962-25365710  | 37       | 43.2%  | 2.7%   | chr1:159744164-159996169  |               |                                                              |                                       |
| CH82-183C10 | chr38:25708246-25926765  | 37       | 37.8%  | 2.7%   | chr1:158901640-159265610  |               |                                                              |                                       |
| CH82-160F08 | chr38:26490011-26647053  | 37       | 21.6%  | 5.4%   | chr1:157972477-158173690  |               |                                                              |                                       |
| CH82-122F19 | chrX:1651879-1665994     | 37       | 0.0%   | 21.6%  | chrX:3134685-3156819      |               |                                                              |                                       |
| CH82-315N13 | chrX:4382351-4589338     | 37       | 51.4%  | 5.4%   | chrX:7213606-7488068      |               |                                                              |                                       |
| CH82-122O09 | chrX:5646908-5840739     | 36       | 52.8%  | 2.8%   | chrX:8827492-9058385      |               |                                                              |                                       |
| CH82-373B18 | chrX:5822318-5989560     | 37       | 51.4%  | 5.4%   | chrX:9038268-9220939      |               |                                                              |                                       |
| CH82-227C15 | chrX:5971142-6187626     | 37       | 43.2%  | 2.7%   | chrX:9201065-9443981      |               |                                                              |                                       |
| CH82-389B13 | chrX:6111233-6325780     | 36       | 50.0%  | 8.3%   | chrX:9327532-9610241      |               |                                                              |                                       |
| CH82-507I17 | chrX:6290220-6483302     | 37       | 48.6%  | 8.1%   | chrX:9574437-9801392      |               |                                                              |                                       |
| CH82-493H08 | chrX:6473119-6653980     | 37       | 45.9%  | 2.7%   | chrX:9788718-9964113      |               |                                                              |                                       |
| CH82-29D17  | chrX:6483311-6693039     | 37       | 45.9%  | 5.4%   | chrX:9801399-10008102     |               |                                                              |                                       |
| CH82-97B04  | chrX:6533886-6775595     | 37       | 21.6%  | 5.4%   | chrX:9850917-10094220     |               |                                                              |                                       |
| CH82-91I11  | chrX:6560558-6775593     | 37       | 24.3%  | 5.4%   | chrX:9881348-10094218     |               |                                                              |                                       |
| CH82-172L08 | chrX:6580406-6792491     | 37       | 21.6%  | 8.1%   | chrX:9902618-10112962     |               |                                                              |                                       |
| CH82-397M10 | chrX:6612686-6813346     | 37       | 24.3%  | 10.8%  | chrX:9935756-10127710     |               |                                                              |                                       |
| CH82-186A13 | chrX:8622483-8841305     | 36       | 22.2%  | 5.6%   | chrX:12159688-12372917    |               |                                                              |                                       |
| CH82-186E11 | chrX:23729023-23936037   | 30       | 20.0%  | 10.0%  | chrX:28636001-28848902    |               |                                                              |                                       |
| CH82-313H10 | chrX:26532025-26753216   | 36       | 22.2%  | 0.0%   | chrX:31439398-31670123    |               |                                                              |                                       |
| CH82-323P17 | chrX:28530722-28627563   | 36       | 22.2%  | 5.6%   | chrX:33572322-33690496    |               |                                                              |                                       |
| CH82-326L07 | chrX:29691785-29861891   | 36       | 22.2%  | 5.6%   | chrX:34714769-34891591    |               |                                                              |                                       |
| CH82-330N15 | chrX:33909051-34103736   | 37       | 21.6%  | 5.4%   | chrX:39156212-39381002    |               |                                                              |                                       |
| CH82-122L02 | chrX:35342480-35540753   | 37       | 0.0%   | 24.3%  | chrX:40823137-41014036    |               |                                                              |                                       |
| CH82-335I16 | chrX:36738805-36947667   | 35       | 31.4%  | 5.7%   | chrX:42405051-42662210    |               |                                                              |                                       |
| CH82-191G09 | chrX:38808689-39026988   | 37       | 21.6%  | 5.4%   | chrX:44886732-45114646    | <b>KDM6A</b>  | <b>lysine (K)-specific demethylase 6A</b>                    | Xp11.2                                |
| CH82-315N11 | chrX:53085751-53275748   | 33       | 21.2%  | 0.0%   | nd                        |               |                                                              |                                       |
| CH82-126J24 | chrX:66297723-66532843   | 36       | 61.1%  | 8.3%   | nd                        |               |                                                              |                                       |
| CH82-335P22 | chrX:85500216-85667178   | 37       | 0.0%   | 45.9%  | chrX:108277972-108556760  |               |                                                              |                                       |
| CH82-184J03 | chrX:108872756-108912373 | 36       | 11.1%  | 52.8%  | chrX:134417680-134432578  |               |                                                              |                                       |
| CH82-335B16 | chrX:110259055-110442724 | 37       | 0.0%   | 29.7%  | chrX:135973776-136176938  |               |                                                              |                                       |
| CH82-126I09 | chrX:121537613-121744136 | 33       | 0.0%   | 27.3%  | chrX:149356337-149590018  |               |                                                              |                                       |
