# Supplementary material
Source: PubMed Central journal article supplement (PMC4304668)
Supplement: NIHMS353590-supplement-SOM_Table_III.pdf [file NIHMS353590-supplement-SOM_Table_III.pdf]

| Clone ID    | P-value  | Dog chromosome location | Human chromosome location | Association | Gene Symbol                                                                                                                            | Gene Description                                                                                                                                                                                                                                                                                              | Human cytogenetic assignment (Entrez)                                                       |
|-------------|----------|-------------------------|---------------------------|-------------|----------------------------------------------------------------------------------------------------------------------------------------|---------------------------------------------------------------------------------------------------------------------------------------------------------------------------------------------------------------------------------------------------------------------------------------------------------------|---------------------------------------------------------------------------------------------|
| CH82-325C12 | 2.90E-15 | chr11:44256300-44428212 | chr9:21971498-22175227    | ↓ loss in T | <b>CDKN2A</b><br>CDKN2BAS<br>CDKN2B                                                                                                    | <b>cyclin-dependent kinase inhibitor 2A (melanoma, p16, inhibits CDK4)</b><br>CDKN2B antisense RNA (non-protein coding)<br>cyclin-dependent kinase inhibitor 2B (p15, inhibits CDK4)                                                                                                                          | <b>9p21</b><br>9p21.3<br>9p21                                                               |
| CH82-518M17 | 2.59E-14 | chr26:30333217-30501573 | chr22:23040362-23163490   | ↓ loss in B | <b>IGL@</b>                                                                                                                            | immunoglobulin lambda locus                                                                                                                                                                                                                                                                                   | 22q11.1-q11.2                                                                               |
| CH82-335B12 | 6.32E-12 | chr7:47644466-47863226  | chr18:43975514-44231745   | ↑ gain in T | <b>RNF165</b><br><b>LOXHD1</b>                                                                                                         | ring finger protein 165<br>lipoxigenase homology domains 1                                                                                                                                                                                                                                                    | 18q21.1<br>18q21.1                                                                          |
| CH82-328B22 | 1.29E-11 | chr11:44781889-44967263 | chr9:22685716-22964798    | ↓ loss in T |                                                                                                                                        |                                                                                                                                                                                                                                                                                                               |                                                                                             |
| CH82-326D17 | 6.15E-10 | chr11:59214619-59407273 | chr9:101883496-102109561  | ↓ loss in T | <b>TGFBR1</b><br><b>ALG2</b><br><b>SEC61B</b>                                                                                          | transforming growth factor, beta receptor 1<br>asparagine-linked glycosylation 2, alpha-1,3-mannosyltransferase homolog (S. cerevisiae)<br>Sec61 beta subunit                                                                                                                                                 | 9q22<br>9q22.33<br>9q22.32-q31.3                                                            |
| CH82-182K13 | 8.27E-10 | chr11:46963358-47162842 | chr9:25449357-25692162    | ↓ loss in T | <b>TUSC1</b>                                                                                                                           | tumor suppressor candidate 1                                                                                                                                                                                                                                                                                  | 9p21.2                                                                                      |
| CH82-323B19 | 9.15E-10 | chr11:62701940-62877297 | chr9:106356737-106560456  | ↓ loss in T |                                                                                                                                        |                                                                                                                                                                                                                                                                                                               |                                                                                             |
| CH82-326L03 | 9.15E-10 | chr29:17828601-18018126 | chr8:65965857-66202007    | ↑ gain in T |                                                                                                                                        |                                                                                                                                                                                                                                                                                                               |                                                                                             |
| CH82-62K23  | 9.59E-10 | chr29:39904804-40101226 | chr8:92644487-92917555    | ↑ gain in T |                                                                                                                                        |                                                                                                                                                                                                                                                                                                               |                                                                                             |
| CH82-186K24 | 1.35E-09 | chr29:11056424-11217103 | chr8:57708443-57903235    | ↑ gain in T |                                                                                                                                        |                                                                                                                                                                                                                                                                                                               |                                                                                             |
| CH82-122K09 | 1.58E-09 | chr11:68337530-68496985 | chr9:113126851-113312950  | ↓ loss in T | <b>IMPAD1</b><br><b>SVEP1</b>                                                                                                          | inositol monophosphatase domain containing 1<br>sushi, von Willebrand factor type A, EGF and pentraxin domain containing 1                                                                                                                                                                                    | 8q12.1<br>9q32                                                                              |
| CH82-188F09 | 1.60E-09 | chr11:64316141-64518503 | chr9:108175680-108433951  | ↓ loss in T | <b>FSD1L</b><br><b>FKTN</b><br><b>TAL2</b>                                                                                             | fibronectin type III and SPRY domain containing 1-like<br>fukutin<br><b>T-cell acute lymphocytic leukemia 2</b>                                                                                                                                                                                               | 9q31<br>9q31-q33<br><b>9q32</b>                                                             |
| CH82-476B13 | 2.18E-09 | chr11:53941124-54164296 | chr9:34170175-34447457    | ↓ loss in T | <b>UBAP1</b><br><b>KIF24</b><br><b>NUDT2</b><br><b>KIAA1161</b><br><b>C9orf24</b><br><b>C9orf25</b><br><b>DCAF12</b><br><b>TMEM215</b> | ubiquitin associated protein 1<br>kinesin family member 24<br>nudix (nucleoside diphosphate linked moiety X)-type motif 2<br>KIAA1161<br>chromosome 9 open reading frame 24<br>chromosome 9 open reading frame 25<br>DDB1 and CUL4 associated factor 12<br>transmembrane protein 215                          | 9p13.3<br>9p13.3<br>9p13<br>9p13.3<br>9p13.3<br>9p13.3<br>9p13.3<br>9p21.1                  |
| CH82-330P17 | 5.02E-09 | chr11:52968262-53138987 | chr9:32726585-32970532    | ↓ loss in T | <b>TEX10</b><br><b>C9orf30</b><br><b>TMEFF1</b>                                                                                        | testis expressed 10<br>chromosome 9 open reading frame 30<br>transmembrane protein with EGF-like and two follistatin-like domains 1                                                                                                                                                                           | 9q31.1<br>9q31.1<br>9q31                                                                    |
| CH82-182N23 | 5.02E-09 | chr11:60273100-60424472 | chr9:103101979-103260787  | ↓ loss in T | <b>C9orf5</b><br><b>MIR32</b><br><b>C9orf4</b>                                                                                         | chromosome 9 open reading frame 5<br>microRNA 32<br>chromosome 9 open reading frame 4                                                                                                                                                                                                                         | 9q31<br>9q31.3<br>9q31                                                                      |
| CH82-283G14 | 8.13E-09 | chr11:67213701-67408065 | chr9:111799260-112018268  | ↓ loss in T | <b>C9orf4</b><br><b>EPB41L4B</b>                                                                                                       | chromosome 9 open reading frame 4<br>erythrocyte membrane protein band 4.1 like 4B                                                                                                                                                                                                                            | 9q31<br>9q31-q32                                                                            |
| CH82-283N18 | 8.61E-09 | chr11:66075523-66263523 | chr9:110459184-110716227  | ↓ loss in T |                                                                                                                                        |                                                                                                                                                                                                                                                                                                               |                                                                                             |
| CH82-126F14 | 9.43E-09 | chr29:16100252-16297400 | chr8:63866886-64142271    | ↑ gain in T | <b>NKAIN3</b><br><b>GGH</b><br><b>TTPA</b><br><b>YTHDF3</b>                                                                            | Na+/K+ transporting ATPase interacting 3<br>gamma-glutamyl hydrolase (conjugase, folylpolyglutamyl hydrolase)<br>tocopherol (alpha) transfer protein<br>YTH domain family, member 3                                                                                                                           | 8q12.3<br>8q12.3<br>8q13.1-q13.3<br>8q12.3                                                  |
| CH82-330F20 | 9.43E-09 | chr29:31039105-31239831 | chr8:81707127-81914953    | ↑ gain in T | <b>ZNF704</b><br><b>PAG1</b>                                                                                                           | zinc finger protein 704<br>phosphoprotein associated with glycosphingolipid microdomains 1                                                                                                                                                                                                                    | 8q21.13<br>8q21.13                                                                          |
| CH82-227C15 | 9.43E-09 | chrX:5971142-6187626    | chrX:9201065-9443981      | ↓ loss in T | <b>TBL1X</b>                                                                                                                           | transducin (beta)-like 1X-linked                                                                                                                                                                                                                                                                              | Xp22.3                                                                                      |
| CH82-307I24 | 1.23E-08 | chr11:49854198-50041767 | chr9:28867679-29097017    | ↓ loss in T | <b>MIR873</b>                                                                                                                          | microRNA 873                                                                                                                                                                                                                                                                                                  | 9p21.1                                                                                      |
| CH82-186L04 | 1.29E-08 | chr29:12919188-13097576 | chr8:60099048-60288616    | ↑ gain in T |                                                                                                                                        |                                                                                                                                                                                                                                                                                                               |                                                                                             |
| CH82-484E08 | 1.29E-08 | chr29:30017710-30207186 | chr8:80452986-80701280    | ↑ gain in T | <b>STMN2</b><br><b>HEY1</b>                                                                                                            | stathmin-like 2<br>hairy/enhancer-of-split related with YRPW motif 1                                                                                                                                                                                                                                          | 8q21.13<br>8q21                                                                             |
| CH82-335J10 | 1.40E-08 | chr27:29995092-30168051 | chr12:20216116-20414056   | ↓ loss in T |                                                                                                                                        |                                                                                                                                                                                                                                                                                                               |                                                                                             |
| CH82-326C11 | 1.59E-08 | chr17:30440924-30645197 | chr2:34748964-34984973    | ↓ loss in T |                                                                                                                                        |                                                                                                                                                                                                                                                                                                               |                                                                                             |
| CH82-474I11 | 1.74E-08 | chr11:56633361-56824997 | chr9:37274866-37489328    | ↓ loss in T | <b>ZCCHC7</b><br><b>GRHPR</b><br><b>ZBTB5</b><br><b>POLR1E</b>                                                                         | zinc finger, CCHC domain containing 7<br>glyoxylate reductase/hydroxypyruvate reductase<br>zinc finger and BTB domain containing 5<br>polymerase (RNA) I polypeptide E, 53kDa                                                                                                                                 | 9p13.2<br>9q12<br>9p13.2<br>9p13.2                                                          |
| CH82-283A15 | 2.16E-08 | chr11:53688814-53860277 | chr9:33901142-34070014    | ↓ loss in T | <b>UBE2R2</b><br><b>UBAP2</b><br><b>SNORD121B</b><br><b>SNORD121A</b>                                                                  | ubiquitin-conjugating enzyme E2R 2<br>ubiquitin associated protein 2<br>small nucleolar RNA, C/D box 121B<br>small nucleolar RNA, C/D box 121A                                                                                                                                                                | 9p13.3<br>9p13.3<br>9p13.3<br>9p13.3                                                        |
| CH82-188B08 | 2.67E-08 | chr36:19726329-19893588 | chr2:173217252-173413578  | ↑ gain in T | <b>ITGA6</b>                                                                                                                           | integrin, alpha 6                                                                                                                                                                                                                                                                                             | 2q31.1                                                                                      |
| CH82-335I16 | 2.72E-08 | chrX:36738805-36947667  | chrX:42405051-42662210    | ↓ loss in T | <b>PPP1R2P9</b><br><b>KIAA1958</b><br><b>C9orf80</b>                                                                                   | protein phosphatase 1, regulatory (inhibitor) subunit 2 pseudogene 9<br>KIAA1958<br>chromosome 9 open reading frame 80                                                                                                                                                                                        | Xp11.4-p11.3<br>9q32<br>9q32                                                                |
| CH82-191N23 | 3.02E-08 | chr11:70086781-70269451 | chr9:115361670-115573042  | ↓ loss in T | <b>SNX30</b>                                                                                                                           | sorting nexin family member 30                                                                                                                                                                                                                                                                                | 9q32                                                                                        |
| CH82-326L05 | 3.13E-08 | chr11:20496756-20706739 | chr5:127808121-128047915  | ↓ loss in T | <b>FBN2</b><br><b>RUSC2</b><br><b>FAM166B</b><br><b>TESK1</b><br><b>CD72</b>                                                           | fibrillin 2<br>RUN and SH3 domain containing 2<br>family with sequence similarity 166, member B<br>testis-specific kinase 1<br>CD72 molecule                                                                                                                                                                  | 5q23-q31<br>9p13.3<br>9p13.3<br>9p13<br>9p13.3                                              |
| CH82-330N18 | 3.56E-08 | chr11:55104897-55322407 | chr9:35491138-35673995    | ↓ loss in T | <b>STT1</b><br><b>RMRP</b><br><b>CCDC107</b><br><b>C9orf100</b><br><b>CA9</b><br><b>TPM2</b><br><b>TLN1</b><br><b>CREB3</b>            | signaling threshold regulating transmembrane adaptor 1<br>RNA component of mitochondrial RNA processing endoribonuclease<br>coiled-coil domain containing 107<br>chromosome 9 open reading frame 100<br>carbonic anhydrase IX<br>tropomyosin 2 (beta)<br>talin 1<br>cAMP responsive element binding protein 3 | 9p13-p12<br>9p21-p12<br>9p13.3<br>9p13.3<br>9p13-p12<br>9p13.2-p13.1<br>9p13<br>9pter-p22.1 |

| Clone ID    | P-value  | Dog chromosome location | Human chromosome location | Association | Gene Symbol          | Gene Description                                                                                | Human cytogenetic assignment (Entrez) |
|-------------|----------|-------------------------|---------------------------|-------------|----------------------|-------------------------------------------------------------------------------------------------|---------------------------------------|
|             |          |                         |                           |             | <i>GBA2</i>          | glucosidase, beta (bile acid) 2                                                                 | 9p13.3                                |
|             |          |                         |                           |             | <i>RGP1</i>          | RGP1 retrograde golgi transport homolog ( <i>S. cerevisiae</i> )                                | 9pter-p22.1                           |
|             |          |                         |                           |             | <i>MSMP</i>          | microseminoprotein, prostate associated                                                         | 9p13.3                                |
| CH82-326D12 | 3.68E-08 | chr38:23819476-24017707 | chr1:161628277-161826899  | ↓ loss in T | <b><i>FCGR2B</i></b> | <b>Fc fragment of IgG, low affinity IIb, receptor (CD32)</b>                                    | <b>1q23</b>                           |
|             |          |                         |                           |             | <i>RPL31P1</i>       | ribosomal protein L31 pseudogene 11                                                             | 1q23.3                                |
|             |          |                         |                           |             | <i>FCRLA</i>         | Fc receptor-like A                                                                              | 1q23.3                                |
|             |          |                         |                           |             | <i>FCRLB</i>         | Fc receptor-like B                                                                              | 1q23.3                                |
|             |          |                         |                           |             | <i>DUSP12</i>        | dual specificity phosphatase 12                                                                 | 1q21-q22                              |
|             |          |                         |                           |             | <i>ATF6</i>          | activating transcription factor 6                                                               | 1q22-q23                              |
| CH82-195D13 | 4.24E-08 | chr11:74425345-74603505 | chr9:120503594-120695547  | ↓ loss in T |                      |                                                                                                 |                                       |
| CH82-326O21 | 4.30E-08 | chr11:70854059-71039141 | chr9:116252635-116460224  | ↓ loss in T | <i>RGS3</i>          | regulator of G-protein signaling 3                                                              | 9q32                                  |
| CH82-335L09 | 4.54E-08 | chr33:3201681-3387833   | chr3:88421711-88660390    | ↑ gain in T |                      |                                                                                                 |                                       |
| CH82-79I21  | 4.82E-08 | chr11:54029173-54260358 | chr9:34279191-34554509    | ↓ loss in T | <i>DNAI1</i>         | dynein, axonemal, intermediate chain 1                                                          | 9p21-p13                              |
|             |          |                         |                           |             | <i>ENHO</i>          | energy homeostasis associated                                                                   | 9p13.3                                |
|             |          |                         |                           |             | <i>CNTRF</i>         | ciliary neurotrophic factor receptor                                                            | 9p13                                  |
| CH82-312I02 | 4.99E-08 | chr29:13618057-13802817 | chr8:61009411-61243838    | ↑ gain in T | <i>CAB</i>           | carbonic anhydrase VIII                                                                         | 8q11-q12                              |
| CH82-335O03 | 5.09E-08 | chr13:44317860-44495975 | chr4:44934837-45176721    | ↓ loss in T |                      |                                                                                                 |                                       |
| CH82-183C10 | 5.29E-08 | chr38:25708246-25926765 | chr1:158901640-159265610  | ↓ loss in T | <i>PYHIN1</i>        | pyrin and HIN domain family, member 1                                                           | 1q23.1                                |
|             |          |                         |                           |             | <i>IFI16</i>         | interferon, gamma-inducible protein 16                                                          | 1q22                                  |
|             |          |                         |                           |             | <i>AIM2</i>          | absent in melanoma 2                                                                            | 1q22                                  |
|             |          |                         |                           |             | <i>CADM3</i>         | cell adhesion molecule 3                                                                        | 1q21.2-q22                            |
|             |          |                         |                           |             | <i>DARC</i>          | Duffy blood group, chemokine receptor                                                           | 1q21-q22                              |
| CH82-323E02 | 5.84E-08 | chr29:42277116-42468869 | chr8:95602167-95836968    | ↑ gain in T | <i>FCER1A</i>        | Fc fragment of IgE, high affinity 1, receptor for; alpha polypeptide                            | 1q23                                  |
|             |          |                         |                           |             | <i>LOC100288748</i>  | hypothetical protein LOC100288748                                                               | 8q22.1                                |
|             |          |                         |                           |             | <i>ESRP1</i>         | epithelial splicing regulatory protein 1                                                        | 8q22.1                                |
|             |          |                         |                           |             | <i>DPY19L4</i>       | dpy-19-like 4 ( <i>C. elegans</i> )                                                             | 8q22.1                                |
|             |          |                         |                           |             | <i>INTS8</i>         | integrator complex subunit 8                                                                    | 8q22.1                                |
| CH82-122C24 | 6.68E-08 | chr6:27299071-27480266  | chr16:20919993-21162553   | ↑ gain in T | <i>LYRM1</i>         | LYR motif containing 1                                                                          | 16p11.2                               |
|             |          |                         |                           |             | <i>DNAH3</i>         | dynein, axonemal, heavy chain 3                                                                 | 16p12.3                               |
| CH82-328D10 | 7.96E-08 | chr38:25164962-25365710 | chr1:159744164-159996169  | ↓ loss in T | <i>DUSP23</i>        | dual specificity phosphatase 23                                                                 | 1q23.2                                |
|             |          |                         |                           |             | <i>FCRL6</i>         | Fc receptor-like 6                                                                              | 1q23.2                                |
|             |          |                         |                           |             | <i>SLAMF8</i>        | SLAM family member 8                                                                            | 1q23.2                                |
|             |          |                         |                           |             | <i>C1orf204</i>      | chromosome 1 open reading frame 204                                                             | 1q23.2                                |
|             |          |                         |                           |             | <i>VSIG8</i>         | V-set and immunoglobulin domain containing 8                                                    | 1q23.2                                |
|             |          |                         |                           |             | <i>CCDC19</i>        | coiled-coil domain containing 19                                                                | 1q22                                  |
|             |          |                         |                           |             | <i>TAGLN2</i>        | transgelin 2                                                                                    | 1q21-q25                              |
|             |          |                         |                           |             | <i>IGSF9</i>         | immunoglobulin superfamily, member 9                                                            | 1q22-q23                              |
|             |          |                         |                           |             | <i>SLAMF9</i>        | SLAM family member 9                                                                            | 1q23.2                                |
| CH82-188A22 | 1.38E-07 | chr11:47987266-48173381 | chr9:26695197-26928914    | ↓ loss in T | <i>C9orf82</i>       | chromosome 9 open reading frame 82                                                              | 9p21.2                                |
|             |          |                         |                           |             | <i>PLAA</i>          | phospholipase A2-activating protein                                                             | 9p21                                  |
| CH82-465J12 | 1.48E-07 | chr20:27883696-28077793 | chr3:66381821-66599802    | ↑ gain in T | <i>SLC25A26</i>      | solute carrier family 25, member 26                                                             | 3p14.1                                |
| CH82-335K09 | 1.71E-07 | chr10:44476493-44645214 | chr2:102013119-102212353  | ↓ loss in T | <i>LRIG1</i>         | leucine-rich repeats and immunoglobulin-like domains 1                                          | 3p14                                  |
|             |          |                         |                           |             | <i>RFX8</i>          | regulatory factor X, 8                                                                          | 2q11.2                                |
| CH82-43N06  | 1.71E-07 | chr20:30069827-30263576 | chr3:63946970-64149074    | ↑ gain in T | <i>ATXN7</i>         | ataxin 7                                                                                        | 3p21.1-p12                            |
|             |          |                         |                           |             | <i>PSMD6</i>         | proteasome (prosome, macropain) 26S subunit, non-ATPase, 6                                      | 3p14.1                                |
|             |          |                         |                           |             | <i>LOC100287879</i>  | hypothetical protein LOC100287879                                                               | 3p14.1                                |
|             |          |                         |                           |             | <i>PRICKLE2</i>      | prickle homolog 2 ( <i>Drosophila</i> )                                                         | 3p14.1                                |
| CH82-323L01 | 1.98E-07 | chr11:73128843-73335733 | chr9:119038458-119256051  | ↓ loss in T | <i>PAPPA</i>         | pregnancy-associated plasma protein A, pappalysin 1                                             | 9q33.2                                |
|             |          |                         |                           |             | <i>ASTN2</i>         | astrotactin 2                                                                                   | 9q33.1                                |
| CH82-126A11 | 2.19E-07 | chr11:36523749-36739999 | chr9:12876195-13130779    | ↓ loss in T | <i>MPDZ</i>          | multiple PDZ domain protein                                                                     | 9p24-p22                              |
| CH82-325D10 | 2.22E-07 | chr29:26683636-26913366 | chr8:76323204-76638495    | ↑ gain in T | <i>HNF4G</i>         | hepatocyte nuclear factor 4, gamma                                                              | 8q21.11                               |
| CH82-106A14 | 2.42E-07 | chr11:65115892-65304070 | chr9:109221085-109476991  | ↓ loss in T |                      |                                                                                                 |                                       |
| CH82-326L11 | 2.63E-07 | chr11:15894670-16095447 | chr5:122366512-122560138  | ↓ loss in T | <i>PP1C</i>          | peptidylprolyl isomerase C (cyclophilin C)                                                      | 5q23.2                                |
| CH82-126B05 | 2.73E-07 | chr11:11844896-12035590 | nd                        | ↓ loss in T | <i>PRDM6</i>         | PR domain containing 6                                                                          | 5q23.2                                |
| CH82-335F20 | 2.73E-07 | chr33:7218463-7406125   | chr3:96851744-97081923    | ↓ loss in T | <i>EPHA6</i>         | EPH receptor A6                                                                                 | 3q11.2                                |
| CH82-307H04 | 2.76E-07 | chr11:75956107-76142514 | chr9:122290137-122507523  | ↓ loss in T |                      |                                                                                                 |                                       |
| CH82-311I23 | 2.87E-07 | chr6:18737657-18940686  | chr7:991387-1198121       | ↑ gain in T | <i>ADAP1</i>         | ArfGAP with dual PH domains 1                                                                   | 7p22.3                                |
|             |          |                         |                           |             | <i>COX19</i>         | COX19 cytochrome c oxidase assembly homolog ( <i>S. cerevisiae</i> )                            | 7p22.3                                |
|             |          |                         |                           |             | <i>CYP2W1</i>        | cytochrome P450, family 2, subfamily W, polypeptide 1                                           | 7p22.3                                |
|             |          |                         |                           |             | <i>C7orf50</i>       | chromosome 7 open reading frame 50                                                              | 7p22.3                                |
|             |          |                         |                           |             | <i>MIR339</i>        | microRNA 339                                                                                    | 7p22.3                                |
|             |          |                         |                           |             | <i>GPR146</i>        | G protein-coupled receptor 146                                                                  | 7p22.3                                |
|             |          |                         |                           |             | <i>GPER</i>          | G protein-coupled estrogen receptor 1                                                           | 7p22.3                                |
|             |          |                         |                           |             | <i>ZFAND2A</i>       | zinc finger, AN1-type domain 2A                                                                 | 7p22.3                                |
| CH82-205N21 | 2.88E-07 | chr36:20959683-21140453 | chr2:174667906-174874306  | ↑ gain in T | <i>SP3</i>           | Sp3 transcription factor                                                                        | 2q31                                  |
| CH82-188H11 | 3.45E-07 | chr11:29760129-29985064 | nd                        | ↓ loss in T |                      |                                                                                                 |                                       |
| CH82-325L14 | 3.54E-07 | chr11:76880486-77092536 | chr9:123558300-123824031  | ↓ loss in T | <i>LOC100288842</i>  | similar to Putative UDP-GlcNAc:betaGal beta-1,3-N-acetylglucosaminyltransferase ENSP00000381720 | 9q33.2                                |
|             |          |                         |                           |             | <i>PSMD5</i>         | proteasome (prosome, macropain) 26S subunit, non-ATPase, 5                                      | 9q33.2                                |
|             |          |                         |                           |             | <i>LOC253039</i>     | hypothetical LOC253039                                                                          | 9q33.2                                |
|             |          |                         |                           |             | <i>PHF19</i>         | PHD finger protein 19                                                                           | 9q33.2                                |
|             |          |                         |                           |             | <i>TRAF1</i>         | TNF receptor-associated factor 1                                                                | 9q33-q34                              |
|             |          |                         |                           |             | <i>C5</i>            | complement component 5                                                                          | 9q33-q34                              |
| CH82-326I23 | 3.67E-07 | chr20:22512735-22690487 | chr8:71284807-71516424    | ↑ gain in T | <b><i>NCOA2</i></b>  | <b>nuclear receptor coactivator 2</b>                                                           | <b>8q13.3</b>                         |

| Clone ID    | P-value  | Dog chromosome location | Human chromosome location | Association              | Gene Symbol                                                                                                      | Gene Description                                                                                                                                                                                                                                                                                                                     | Human cytogenetic assignment (Entrez)                                         |
|-------------|----------|-------------------------|---------------------------|--------------------------|------------------------------------------------------------------------------------------------------------------|--------------------------------------------------------------------------------------------------------------------------------------------------------------------------------------------------------------------------------------------------------------------------------------------------------------------------------------|-------------------------------------------------------------------------------|
| CH82-32022  | 3.07E-07 | chr29:22913733-22939467 | chr9:1264607-12650424     | ↑ gain in T              | <i>TRAM1</i>                                                                                                     | translocation associated membrane protein 1                                                                                                                                                                                                                                                                                          | 8q13.3                                                                        |
| CH82-335P22 | 4.12E-07 | chrX:85500216-85667178  | chrX:108277972-108556760  | ↑ gain in T              |                                                                                                                  |                                                                                                                                                                                                                                                                                                                                      |                                                                               |
| CH82-388J08 | 5.44E-07 | chr11:57981148-58178226 | chr9:100407817-100620444  | ↓ loss in T              | <i>NCBP1</i><br><i>XPA</i>                                                                                       | nuclear cap binding protein subunit 1, 80kDa<br><b>xeroderma pigmentosum, complementation group A</b>                                                                                                                                                                                                                                | 9q34.1<br><b>9q22.3</b>                                                       |
| CH82-186P04 | 5.48E-07 | chr11:27687472-27890432 | chr5:136241666-136455973  | ↓ loss in T              | <i>FOXE1</i><br><i>SPOCK1</i>                                                                                    | forkhead box E1 (thyroid transcription factor 2)<br>sparc/osteonectin, cwcv and kazal-like domains proteoglycan (testican) 1                                                                                                                                                                                                         | 9q22<br>5q31                                                                  |
| CH82-283I16 | 5.48E-07 | chr17:16182339-16366149 | chr2:17941094-18217316    | ↓ loss in T              | <i>GEN1</i><br><i>MSGN1</i><br><i>KCNJ3</i><br><i>CSPG5</i><br><i>SMARCC1</i>                                    | Gen homolog 1, endonuclease (Drosophila)<br>mesogenin 1<br>potassium voltage-gated channel, delayed-rectifier, subfamily S, member 3<br>chondroitin sulfate proteoglycan 5 (neuroglycan C)<br>SWI/SNF related, matrix associated, actin dependent regulator of chromatin, subfamily c, member 1                                      | 2p24.2<br>2p24.2<br>2p24<br>3p21.3<br>3p23-p21                                |
| CH82-199P08 | 5.50E-07 | chr20:44212695-44392773 | chr3:47562257-47764195    | ↑ gain in T              |                                                                                                                  |                                                                                                                                                                                                                                                                                                                                      |                                                                               |
| CH82-335B14 | 6.38E-07 | chr15:50607472-50807713 | chr4:150399954-150629180  | ↓ loss in T              |                                                                                                                  |                                                                                                                                                                                                                                                                                                                                      |                                                                               |
| CH82-323J05 | 6.74E-07 | chr11:16821154-17005420 | chr5:123368897-123608330  | ↓ loss in T              |                                                                                                                  |                                                                                                                                                                                                                                                                                                                                      |                                                                               |
| CH82-62D11  | 6.74E-07 | chr11:19493280-19727771 | chr5:126708683-126964715  | ↓ loss in T              | <i>MEGF10</i><br><i>PRRC1</i>                                                                                    | multiple EGF-like-domains 10<br>proline-rich coiled-coil 1                                                                                                                                                                                                                                                                           | 5q33                                                                          |
| CH82-126L20 | 6.92E-07 | chr3:41442419-41673900  | chr15:29572544-29812637   | ↑ gain in B/ ↑ loss in T | <i>FAM189A1</i>                                                                                                  | family with sequence similarity 189, member A1                                                                                                                                                                                                                                                                                       | 15q13.1                                                                       |
| CH82-328H09 | 8.06E-07 | chr29:25727982-25904378 | chr8:75174568-75393390    | ↑ gain in T              | <i>JPH1</i><br><i>GDAP1</i>                                                                                      | junctionophilin 1<br>ganglioside-induced differentiation-associated protein 1                                                                                                                                                                                                                                                        | 8q21<br>8q21.11                                                               |
| CH82-283M14 | 8.34E-07 | chr11:17730891-17930078 | chr5:124465395-124713824  | ↓ loss in T              | <i>MYOT</i>                                                                                                      | myotilin                                                                                                                                                                                                                                                                                                                             | 5q31                                                                          |
| CH82-126B13 | 8.62E-07 | chr11:28542575-28755793 | chr5:137155789-137413182  | ↓ loss in T              | <i>PKD2L2</i><br><i>FAM13B</i>                                                                                   | polycystic kidney disease 2-like 2<br>family with sequence similarity 13, member B                                                                                                                                                                                                                                                   | 5q31<br>5q31                                                                  |
| CH82-191F04 | 8.62E-07 | chr17:15316830-15469466 | chr2:16881566-17111647    | ↓ loss in T              |                                                                                                                  |                                                                                                                                                                                                                                                                                                                                      |                                                                               |
| CH82-323K08 | 8.77E-07 | chr29:14622563-14833432 | chr8:62175093-62433769    | ↑ gain in T              | <i>CLVS1</i><br><i>ASPH</i>                                                                                      | clavesin 1<br>aspartate beta-hydroxylase                                                                                                                                                                                                                                                                                             | 8q12.3<br>8q12.1                                                              |
| CH82-122L07 | 9.83E-07 | chr11:9362920-9542518   | chr5:116030581-116235057  | ↓ loss in T              |                                                                                                                  |                                                                                                                                                                                                                                                                                                                                      |                                                                               |
| CH82-465G11 | 9.83E-07 | chr11:26672686-26878843 | chr5:134976198-135285012  | ↓ loss in T              | <i>LOC340074</i><br><i>IL9</i><br><i>FBXL21</i><br><i>LECT2</i>                                                  | hypothetical LOC340074<br>interleukin 9<br>F-box and leucine-rich repeat protein 21 (gene/pseudo gene)<br>leukocyte cell-derived chemotaxin 2                                                                                                                                                                                        | 5q31.1<br>5q31.1<br>5q31<br>5q31.1-q32                                        |
| CH82-323H01 | 1.05E-06 | chr6:28940939-29133680  | chr16:19079114-19327301   | ↑ gain in T              | <i>COQ7</i><br><i>ITPR1PL2</i><br><i>SYT17</i><br><i>LOC728276</i>                                               | coenzyme Q7 homolog, ubiquinone (yeast)<br>inositol 1,4,5-triphosphate receptor interacting protein-like 2<br>synaptotagmin XVII<br>hypothetical LOC728276                                                                                                                                                                           | 16p13.1-p12.3<br>16p12.3<br>16p12.3<br>16p12.3                                |
| CH82-122F19 | 1.05E-06 | chrX:1651879-1665994    | chrX:3134685-3156819      | ↑ gain in T              |                                                                                                                  |                                                                                                                                                                                                                                                                                                                                      |                                                                               |
| CH82-126F15 | 1.14E-06 | chr29:21252970-21460451 | chr8:69786666-70031231    | ↑ gain in T              |                                                                                                                  |                                                                                                                                                                                                                                                                                                                                      |                                                                               |
| CH82-283L06 | 1.27E-06 | chr38:22474724-22638988 | chr1:163228114-163431132  | ↓ loss in T              |                                                                                                                  |                                                                                                                                                                                                                                                                                                                                      |                                                                               |
| CH82-126B11 | 1.35E-06 | chr19:19825129-20052640 | chr4:124246232-124507605  | ↑ gain in T              | <i>NUF2</i>                                                                                                      | NUF2, NDC80 kinetochore complex component, homolog (S. cerevisiae)                                                                                                                                                                                                                                                                   | 1q23.3                                                                        |
| CH82-362P01 | 1.39E-06 | chr36:18365962-18563705 | chr2:171671651-171868093  | ↑ gain in T              | <i>SPRY1</i><br><i>GAD1</i><br><i>GORASP2</i><br><i>TLK1</i>                                                     | sprouty homolog 1, antagonist of FGF signaling (Drosophila)<br>glutamate decarboxylase 1 (brain, 67kDa)<br>golgi reassembly stacking protein 2, 55kDa<br>tousled-like kinase 1                                                                                                                                                       | 4q28.1<br>2q31<br>2q31.1-q31.2<br>2q31.1                                      |
| CH82-335J09 | 1.43E-06 | chr33:26526576-26712986 | chr3:119581409-119816945  | ↓ loss in T              | <i>GSK3B</i>                                                                                                     | glycogen synthase kinase 3 beta                                                                                                                                                                                                                                                                                                      | 3q13.3                                                                        |
| CH82-326A13 | 1.58E-06 | chr11:61849471-62044977 | chr9:105043328-105347967  | ↑ loss in T              |                                                                                                                  |                                                                                                                                                                                                                                                                                                                                      |                                                                               |
| CH82-126L23 | 1.69E-06 | chr6:47416907-47581966  | chr1:107553676-107732705  | ↑ gain in T              | <i>PRMT6</i><br><i>NTNG1</i><br><i>MYO1C</i>                                                                     | protein arginine methyltransferase 6<br>netrin G1<br>myosin IC                                                                                                                                                                                                                                                                       | 1p13.3<br>1p13.3<br>17p13                                                     |
| CH82-43805  | 1.74E-06 | chr9:48965695-49169481  | chr17:1374865-1607726     | ↑ gain in T              | <i>INPP5K</i><br><i>PITPNA</i><br><i>SLC43A2</i><br><i>SCARF1</i><br><i>RILP</i><br><i>PRPF8</i><br><i>TLCD2</i> | inositol polyphosphate-5-phosphatase K<br>phosphatidylinositol transfer protein, alpha<br>solute carrier family 43, member 2<br>scavenger receptor class F, member 1<br>Rab interacting lysosomal protein<br>PRPF8 pre-mRNA processing factor 8 homolog (S. cerevisiae)<br>TLC domain containing 2                                   | 17p13.3<br>17p13.3<br>17p13.3<br>17p13.3<br>17p13.3<br>17p13.3<br>17p13.3     |
| CH82-307H01 | 2.01E-06 | chr17:20383332-20583261 | chr2:22981692-232115059   | ↓ loss in T              |                                                                                                                  |                                                                                                                                                                                                                                                                                                                                      |                                                                               |
| CH82-335J12 | 2.16E-06 | chr4:91104162-91270051  | chr5:14988134-15230669    | ↓ loss in T              |                                                                                                                  |                                                                                                                                                                                                                                                                                                                                      |                                                                               |
| CH82-328A15 | 2.64E-06 | chr11:12876081-13075538 | chr5:119836983-120081168  | ↓ loss in T              | <i>PRR16</i>                                                                                                     | proline rich 16                                                                                                                                                                                                                                                                                                                      | 5q23.1                                                                        |
| CH82-122K20 | 2.72E-06 | chr17:28982145-29182179 | chr2:32881557-33110541    | ↓ loss in T              | <i>TTC27</i><br><i>LOC285045</i>                                                                                 | tetratricopeptide repeat domain 27<br>hypothetical LOC285045                                                                                                                                                                                                                                                                         | 2p22.3<br>2p22.3                                                              |
| CH82-326G17 | 2.80E-06 | chr17:22039335-22258253 | chr2:24919881-25185699    | ↓ loss in T              | <i>NCOA1</i><br><i>C2orf79</i><br><i>CENPO</i><br><i>ADCY3</i><br><i>DNAJC27</i>                                 | <b>nuclear receptor coactivator 1</b><br>chromosome 2 open reading frame 79<br>centromere protein O<br>adenylate cyclase 3<br>DnaJ (Hsp40) homolog, subfamily C, member 27                                                                                                                                                           | <b>2p23</b><br>2p23.3<br>2p23.3<br>2p23.3<br>2p23.3                           |
| CH82-122K05 | 3.38E-06 | chr38:16048359-16219112 | chr1:218059518-218276635  | ↓ loss in T              | <i>C2orf39</i><br><i>OTOF</i><br><i>C2orf70</i>                                                                  | chromosome 2 open reading frame 39<br>otoferlin<br>chromosome 2 open reading frame 70                                                                                                                                                                                                                                                | 2p23.3<br>2p23.1<br>2p23.3                                                    |
| CH82-188J16 | 3.45E-06 | chr17:23478945-23689925 | chr2:26655053-26890338    | ↓ loss in T              | <i>CLB4</i><br><i>SLC25A20</i><br><i>C3orf71</i><br><i>ARIH2</i><br><i>P4HTM</i><br><i>WDR6</i><br><i>DALRD3</i> | calcium and integrin binding family member 4<br>solute carrier family 25 (carnitine/acylcarnitine translocase), member 20<br>chromosome 3 open reading frame 71<br>ariadne homolog 2 (Drosophila)<br>prolyl 4-hydroxylase, transmembrane (endoplasmic reticulum)<br>WD repeat domain 6<br>DALR anticodon binding domain containing 3 | 2p23.3<br>3p21.31<br>3p21.31<br>3p21.2-p21.3<br>3p21.31<br>3p21.31<br>3p21.31 |

| Clone ID      | P-value                             | Dog chromosome location | Human chromosome location | Association | Gene Symbol      | Gene Description                                                                       | Human cytogenetic assignment (Entrez) |
|---------------|-------------------------------------|-------------------------|---------------------------|-------------|------------------|----------------------------------------------------------------------------------------|---------------------------------------|
| CH82-332L12   | 3.92E-06                            | chr20:43028069-43253372 | chr3:48922261-49207828    | ↑ gain in T | <i>MIR425</i>    | microRNA 425                                                                           | 3p21.31                               |
|               |                                     |                         |                           |             | <i>NDUFAF3</i>   | NADH dehydrogenase (ubiquinone) 1 alpha subcomplex, assembly factor 3                  | 3p21.31                               |
|               |                                     |                         |                           |             | <i>MIR191</i>    | microRNA 191                                                                           | 3p21.31                               |
|               |                                     |                         |                           |             | <i>IMPDH2</i>    | IMP (inosine monophosphate) dehydrogenase 2                                            | 3p21.2                                |
|               |                                     |                         |                           |             | <i>QRICH1</i>    | glutamine-rich 1                                                                       | 3p21.31                               |
|               |                                     |                         |                           |             | <i>QARS</i>      | glutamyl-tRNA synthetase                                                               | 3p21.3-p21.1                          |
|               |                                     |                         |                           |             | <i>USP19</i>     | ubiquitin specific peptidase 19                                                        | 3p21.31                               |
|               |                                     |                         |                           |             | <i>LAMB2</i>     | laminin, beta 2 (laminin 5)                                                            | 3p21                                  |
|               |                                     |                         |                           |             | <i>LAMB2L</i>    | laminin, beta 2-like                                                                   | 3p21.3-p21.2                          |
|               |                                     |                         |                           |             | <i>CCDC71</i>    | coiled-coil domain containing 71                                                       | 3p21.31                               |
| CH82-287K01   | 4.24E-06                            | chr36:10383239-10579479 | chr2:162822527-163020917  | ↑ gain in T | <i>SLC4A10</i>   | solute carrier family 4, sodium bicarbonate transporter, member 10                     | 2q23-q24                              |
|               |                                     |                         |                           |             | <i>DPP4</i>      | dipeptidyl-peptidase 4                                                                 | 2q24.3                                |
|               |                                     |                         |                           |             | <i>GCG</i>       | glucagon                                                                               | 2q36-q37                              |
| CH82-330A20   | 4.40E-06                            | chr11:24341825-24533759 | chr5:132409181-132598887  | ↑ loss in T | <i>HSPA4</i>     | heat shock 70kDa protein 4                                                             | 5q31.1-q31.2                          |
|               |                                     |                         |                           |             | <i>FSTL4</i>     | folliculin-like 4                                                                      | 5q31.1                                |
| CH82-330C22   | 4.62E-06                            | chr20:34378206-34586424 | chr3:59140056-59399519    | ↑ gain in T |                  |                                                                                        |                                       |
| CH82-283O13   | 4.62E-06                            | chr20:38803526-38998514 | chr3:54069992-54289308    | ↑ gain in T |                  |                                                                                        |                                       |
| CH82-197E07   | 4.64E-06                            | chr26:16599392-16783033 | chr12:117407679-117614137 | ↑ gain in T | <i>CACNA2D3</i>  | calcium channel, voltage-dependent, alpha 2/delta subunit 3                            | 3p21.1                                |
|               |                                     |                         |                           |             | <i>FBXW8</i>     | F-box and WD repeat domain containing 8                                                | 12q24.21tdb9938                       |
| CH82-126F23   | 4.91E-06                            | chr20:11244176-11434550 | chr3:9861444-10142042     | ↑ gain in T | <i>TESC</i>      | tescalcin                                                                              | 12q24.22                              |
|               |                                     |                         |                           |             | <i>FBXO21</i>    | F-box protein 21                                                                       | 12q24.22                              |
|               |                                     |                         |                           |             | <i>TTL3</i>      | tubulin tyrosine ligase-like family, member 3                                          | 3p25.3                                |
|               |                                     |                         |                           |             | <i>RPUSD3</i>    | RNA pseudouridylylase domain containing 3                                              | 3p25.3                                |
|               |                                     |                         |                           |             | <i>CIDEA</i>     | cell death-inducing DFFA-like effector c                                               | 3p25.3                                |
|               |                                     |                         |                           |             | <i>JAGN1</i>     | Jaqual homolog 1 (Drosophila)                                                          | 3p25.2                                |
|               |                                     |                         |                           |             | <i>IL17RE</i>    | interleukin 17 receptor E                                                              | 3p25.3                                |
|               |                                     |                         |                           |             | <i>IL17RC</i>    | interleukin 17 receptor C                                                              | 3p25.3 3p25.3-p24.1                   |
|               |                                     |                         |                           |             | <i>CRELD1</i>    | cysteine-rich with EGF-like domains 1                                                  | 3p25.3                                |
|               |                                     |                         |                           |             | <i>PRRT3</i>     | proline-rich transmembrane protein 3                                                   | 3p25.3                                |
|               |                                     |                         |                           |             | <i>TMEM111</i>   | transmembrane protein 111                                                              | 3p25.3                                |
|               |                                     |                         |                           |             | <i>LOC401052</i> | hypothetical LOC401052                                                                 | 3p25.3                                |
|               |                                     |                         |                           |             | <i>CIDECP</i>    | cell death-inducing DFFA-like effector c pseudogene                                    | 3p25.3                                |
|               |                                     |                         |                           |             | <i>FANCD2</i>    | <b>Fanconi anemia, complementation group D2</b>                                        | <b>3p26</b>                           |
|               |                                     |                         |                           |             | <i>C3orf24</i>   | chromosome 3 open reading frame 24                                                     | 3p25.3                                |
| CH82-283D08   | 4.91E-06                            | chr20:37508675-37684858 | chr3:55599537-55792885    | ↑ gain in T | <i>ERC2</i>      | ELKS/RAB6-interacting/CAST family member 2                                             | 3p14.3                                |
|               |                                     |                         |                           |             | <i>C3orf51</i>   | chromosome 3 open reading frame 51                                                     | 3p14.3                                |
| CH82-326I09   | 5.03E-06                            | chr11:13788787-13969984 | nd                        | ↑ loss in T |                  |                                                                                        |                                       |
| CH82-465E12   | 5.36E-06                            | chr38:18965987-19161116 | chr1:221568796-221824332  | ↑ loss in T |                  |                                                                                        |                                       |
| CH82-106N08   | 5.52E-06                            | chr30:13770057-13795176 | chr15:44356478-44373885   | ↑ loss in T |                  |                                                                                        |                                       |
| CH82-326P11   | 5.58E-06                            | chr11:34247809-34423350 | chr9:10562093-10757698    | ↑ loss in T |                  |                                                                                        |                                       |
| CH82-313B16   | 5.73E-06                            | chr20:40862782-41039499 | chr3:51620433-51846942    | ↑ gain in T | <i>FRMD5</i>     | FERM domain containing 5                                                               | 15q15.3                               |
|               |                                     |                         |                           |             | <i>PTPRD</i>     | protein tyrosine phosphatase, receptor type, D                                         | 9p23-p24.3                            |
|               |                                     |                         |                           |             | <i>RAD54L2</i>   | RAD54-like 2 (S. cerevisiae)                                                           | 3p21.2                                |
|               |                                     |                         |                           |             | <i>TEX264</i>    | testis expressed 264                                                                   | 3p21.31                               |
|               |                                     |                         |                           |             | <i>GRM2</i>      | glutamate receptor, metabotropic 2                                                     | 3p21.2                                |
|               |                                     |                         |                           |             | <i>IQCF6</i>     | IQ motif containing F6                                                                 | 3p21.2                                |
|               |                                     |                         |                           |             | <i>DNAH1</i>     | dynein, axonemal, heavy chain 1                                                        | 3p21.1                                |
|               |                                     |                         |                           |             | <i>BAP1</i>      | BRCA1 associated protein-1 (ubiquitin carboxy-terminal hydrolase)                      | 3p21.31-p21.2                         |
|               |                                     |                         |                           |             | <i>PHF7</i>      | PHD finger protein 7                                                                   | 3p21.1                                |
|               |                                     |                         |                           |             | <i>SEMA3G</i>    | sema domain, immunoglobulin domain (Ig), short basic domain, secreted, (semaphorin) 3G | 3p21.1                                |
|               |                                     |                         |                           |             | <i>TNNC1</i>     | troponin C type 1 (slow)                                                               | 3p21.3-p14.3                          |
|               |                                     |                         |                           |             | <i>NISCH</i>     | nischarin                                                                              | 3p21.1                                |
| <i>STAB1</i>  | stabilin 1                          | 3p21.1                  |                           |             |                  |                                                                                        |                                       |
| <i>NT5DC2</i> | 5'-nucleotidase domain containing 2 | 3p21.1                  |                           |             |                  |                                                                                        |                                       |
| <i>PBRM1</i>  | polybromo 1                         | 3p21                    |                           |             |                  |                                                                                        |                                       |
| CH82-313O22   | 5.82E-06                            | chr29:16852524-17055678 | chr8:64800376-65025232    | ↑ gain in T |                  |                                                                                        |                                       |
| CH82-465H08   | 6.06E-06                            | chr38:16739980-16926449 | chr1:218892467-219122824  | ↑ loss in T |                  |                                                                                        |                                       |
| CH82-320D03   | 6.19E-06                            | chr20:40178327-40372988 | chr3:52420229-52631580    | ↑ gain in T |                  |                                                                                        |                                       |
| CH82-307K12   | 6.49E-06                            | chr38:12820932-12993661 | chr1:188214552-188433196  | ↑ loss in T |                  |                                                                                        |                                       |
| CH82-287E02   | 6.56E-06                            | chr9:7511356-7719383    | chr17:73881867-74136891   | ↑ gain in T | <i>TRIM65</i>    | tripartite motif-containing 65                                                         | 17q25.1                               |
|               |                                     |                         |                           |             | <i>MRPL38</i>    | mitochondrial ribosomal protein L38                                                    | 17q25.3                               |
|               |                                     |                         |                           |             | <i>FBF1</i>      | Fas (TNFRSF6) binding factor 1                                                         | 17q25.1                               |
|               |                                     |                         |                           |             | <i>ACOX1</i>     | acyl-Coenzyme A oxidase 1, palmitoyl                                                   | 17q24-q25 17q25.1                     |
|               |                                     |                         |                           |             | <i>CLTorf106</i> | chromosome 17 open reading frame 106                                                   | 17q25.1                               |
|               |                                     |                         |                           |             | <i>CDK3</i>      | cyclin-dependent kinase 3                                                              | 17q22-qter                            |
|               |                                     |                         |                           |             | <i>EVPL</i>      | envoplakin                                                                             | 17q25                                 |
|               |                                     |                         |                           |             | <i>SRP68</i>     | signal recognition particle 68kDa                                                      | 17q25.1                               |
|               |                                     |                         |                           |             | <i>GALR2</i>     | galanin receptor 2                                                                     | 17q25.3                               |
|               |                                     |                         |                           |             | <i>ZACN1</i>     | zinc activated ligand-gated ion channel                                                | 17q25.3                               |
|               |                                     |                         |                           |             | <i>EXOC7</i>     | exocyst complex component 7                                                            | 17q25.1                               |
|               |                                     |                         |                           |             | <i>FOXJ1</i>     | forkhead box J1                                                                        | 17q22-q25                             |
| CH82-323H24   | 6.69E-06                            | chr6:5347044-5540968    | chr7:70632489-70881020    | ↑ gain in T |                  |                                                                                        |                                       |
| CH82-313O20   | 6.77E-06                            | chr26:29493753-29700773 | nd                        | ↑ loss in B |                  |                                                                                        |                                       |
| CH82-325K13   | 7.06E-06                            | chr17:18335211-18548645 | chr2:20550921-20808883    | ↑ loss in T |                  |                                                                                        |                                       |
| CH82-191D18   | 7.06E-06                            | chr17:34789107-34978584 | chr2:39945500-40151332    | ↑ loss in T |                  |                                                                                        |                                       |
| CH82-184A16   | 7.08E-06                            | chr29:3083718-3274149   | chr8:48731266-48893362    | ↑ gain in T |                  |                                                                                        |                                       |
| CH82-184A16   | 7.08E-06                            | chr29:3083718-3274149   | chr8:48731266-48893362    | ↑ gain in T | <i>RHOB</i>      | ras homolog gene family, member B                                                      | 2p24                                  |
|               |                                     |                         |                           |             | <i>RHOA</i>      | ras homolog gene family, member B                                                      | 2p24                                  |
| CH82-184A16   | 7.08E-06                            | chr29:3083718-3274149   | chr8:48731266-48893362    | ↑ gain in T | <i>THUMP2</i>    | THUMP domain containing 2                                                              | 2p22.1 2p22-p21                       |
|               |                                     |                         |                           |             | <i>PRKDC</i>     | protein kinase, DNA-activated, catalytic polypeptide                                   | 8q11                                  |
| CH82-184A16   | 7.08E-06                            | chr29:3083718-3274149   | chr8:48731266-48893362    | ↑ gain in T | <i>MCM4</i>      | minichromosome maintenance complex component 4                                         | 8q11.2                                |

| Clone ID    | P-value  | Dog chromosome location | Human chromosome location | Association              | Gene Symbol      | Gene Description                                                                      | Human cytogenetic assignment (Entrez) |
|-------------|----------|-------------------------|---------------------------|--------------------------|------------------|---------------------------------------------------------------------------------------|---------------------------------------|
| CH82-126N19 | 7.16E-06 | chr23:36325098-36545513 | chr3:136560966-136796268  | ↓ loss in T              | <i>TMEM22</i>    | transmembrane protein 22                                                              | 3q22.3                                |
|             |          |                         |                           |                          | <i>NCK1</i>      | NCK adaptor protein 1                                                                 | 3q21                                  |
|             |          |                         |                           |                          | <i>IL20RB</i>    | interleukin 20 receptor beta                                                          | 3q22.3                                |
| CH82-323J24 | 7.43E-06 | chr29:34089937-34252905 | chr8:85404014-85569621    | ↑ gain in T              | <i>RALYL</i>     | RALY RNA binding protein-like                                                         | 8q21.2                                |
| CH82-106H09 | 7.53E-06 | chr29:32308350-32504845 | chr8:83192551-83389790    | ↑ gain in T              |                  |                                                                                       |                                       |
| CH82-323C23 | 8.27E-06 | chr9:60409246-60620851  | chr9:128652708-128896784  | ↑ gain in T              | <i>PBX3</i>      | pre-B-cell leukemia homeobox 3                                                        | 9q33-q34                              |
| CH82-182D13 | 8.36E-06 | chr38:20156017-20370321 | chr1:166036813-166340889  | ↑ loss in T              | <i>FAM78B</i>    | family with sequence similarity 78, member B                                          | 1q24.1                                |
|             |          |                         |                           |                          | <i>MIR921</i>    | microRNA 921                                                                          | 1q24.1                                |
| CH82-122E24 | 8.91E-06 | chr5:30408016-30612845  | chr11:104298356-104516456 | ↑ loss in T              |                  |                                                                                       |                                       |
| CH82-283K03 | 8.91E-06 | chr11:10542126-10752622 | chr5:117307578-117525785  | ↑ loss in T              |                  |                                                                                       |                                       |
| CH82-126J24 | 8.92E-06 | chrX:66297723-66532843  | nd                        | ↑ gain in B/ ↑ loss in T |                  |                                                                                       |                                       |
| CH82-518A12 | 1.14E-05 | chr28:4306590-4500535   | chr10:50597303-50843683   | ↑ loss in T              | <i>DRGX</i>      | dorsal root ganglia homeobox                                                          | 10q11.23                              |
|             |          |                         |                           |                          | <i>ERCC6</i>     | excision repair cross-complementing rodent repair deficiency, complementation group 6 | 10q11.23                              |
|             |          |                         |                           |                          | <i>PCBD3</i>     | piqvBac transposable element derived 3                                                | 10q11                                 |
|             |          |                         |                           |                          | <i>CHAT</i>      | choline acetyltransferase                                                             | 10q11.2                               |
|             |          |                         |                           |                          | <i>SLC18A3</i>   | solute carrier family 18 (vesicular acetylcholine), member 3                          | 10q11.2                               |
| CH82-94G19  | 1.22E-05 | chr17:61699577-61879108 | chr1:145410389-145632099  | ↑ loss in T              | <i>HFE2</i>      | hemochromatosis type 2 (juvenile)                                                     | 1q21.1                                |
|             |          |                         |                           |                          | <i>TXNIP</i>     | thioredoxin interacting protein                                                       | 1q21.1                                |
|             |          |                         |                           |                          | <i>POLR3GL</i>   | polymerase (RNA) III (DNA directed) polypeptide G (32kD)-like                         | 1q21.1                                |
|             |          |                         |                           |                          | <i>ANKRD34A</i>  | ankyrin repeat domain 34A                                                             | 1q21.1                                |
|             |          |                         |                           |                          | <i>LIX1L</i>     | Lix1 homolog (mouse)-like                                                             | 1q21.1                                |
|             |          |                         |                           |                          | <i>RBM8A</i>     | RNA binding motif protein 8A                                                          | 1q12                                  |
|             |          |                         |                           |                          | <i>GNRH2</i>     | gonadotropin-releasing hormone (type 2) receptor 2                                    | 1q12                                  |
|             |          |                         |                           |                          | <i>PEX11B</i>    | peroxisomal biogenesis factor 11 beta                                                 | 1q21.1                                |
|             |          |                         |                           |                          | <i>ITGA10</i>    | integrin, alpha 10                                                                    | 1q21                                  |
|             |          |                         |                           |                          | <i>ANKRD35</i>   | ankyrin repeat domain 35                                                              | 1q21.1                                |
|             |          |                         |                           |                          | <i>PIAS3</i>     | protein inhibitor of activated STAT, 3                                                | 1q21                                  |
|             |          |                         |                           |                          | <i>NUDT17</i>    | nudix (nucleoside diphosphate linked moiety X)-type motif 17                          | 1q21.1                                |
|             |          |                         |                           |                          | <i>POLR3C</i>    | polymerase (RNA) III (DNA directed) polypeptide C (62kD)                              | 1q21.1                                |
|             |          |                         |                           |                          | <i>RNF115</i>    | ring finger protein 115                                                               | 1q21.1                                |
| CH82-335L10 | 1.22E-05 | chr36:25648504-25871279 | chr2:179909543-180205511  | ↑ gain in T              | <i>CCDC141</i>   | coiled-coil domain containing 141                                                     | 2q31.2                                |
|             |          |                         |                           |                          | <i>SESTD1</i>    | SEC14 and spectrin domains 1                                                          | 2q31.2                                |
| CH82-332F13 | 1.26E-05 | chr20:10314881-10478254 | chr3:10941677-11124671    | ↑ gain in T              | <i>SLC6A11</i>   | solute carrier family 6 (neurotransmitter transporter, GABA), member 11               | 3p25.3                                |
|             |          |                         |                           |                          | <i>SLC6A1</i>    | solute carrier family 6 (neurotransmitter transporter, GABA), member 1                | 3p25-p24                              |
| CH82-186J14 | 1.30E-05 | chr17:61930911-62137623 | chr1:149179230-149706240  | ↑ loss in T              | <i>LOC388692</i> | hypothetical LOC388692                                                                | 1q21.2                                |
|             |          |                         |                           |                          | <i>FCGR1C</i>    | Fc fragment of IgG, high affinity 1c, receptor (CD64)                                 | 1q21.2                                |
|             |          |                         |                           |                          | <i>HIST2H2BF</i> | histone cluster 2, H2bf                                                               | 1q21.2                                |
|             |          |                         |                           |                          | <i>PPIAL4A</i>   | peptidylprolyl isomerase A (cyclophilin A)-like 4A                                    | 1q21.2                                |
|             |          |                         |                           |                          | <i>PPIAL4G</i>   | peptidylprolyl isomerase A (cyclophilin A)-like 4G                                    |                                       |
|             |          |                         |                           |                          | <i>PPIAL4C</i>   | peptidylprolyl isomerase A (cyclophilin A)-like 4C                                    | 1q21.2                                |
|             |          |                         |                           |                          | <i>PPIAL4B</i>   | peptidylprolyl isomerase A (cyclophilin A)-like 4B                                    | 1q21.1                                |
|             |          |                         |                           |                          | <i>LOC728855</i> | hypothetical LOC728855                                                                | 1q21.1                                |
| CH82-326M16 | 1.51E-05 | chr17:47713690-47895377 | chr2:79388696-79644918    | ↑ loss in T              |                  |                                                                                       |                                       |
| CH82-465M14 | 1.58E-05 | chr30:23314624-23526903 | chr15:55207135-55393639   | ↑ loss in T              |                  |                                                                                       |                                       |
| CH82-182A16 | 1.77E-05 | chr11:37999014-38200895 | chr9:14487681-14734319    | ↑ loss in T              | <i>ZDHHC21</i>   | zinc finger, DHHC-type containing 21                                                  | 9p22.3                                |
|             |          |                         |                           |                          | <i>CER1</i>      | cerberus 1, cysteine knot superfamily, homolog (Xenopus laevis)                       | 9p23-p22                              |
| CH82-307M10 | 2.01E-05 | chr17:11406667-11608797 | chr2:11914569-12153597    | ↑ loss in T              | <i>LPIN1</i>     | lipin 1                                                                               | 2p25.1                                |
