# Supplementary material
Source: PubMed Central journal article supplement (PMC4304668)
Supplement: NIHMS353590-supplement-SOM_Table_IV.pdf [file NIHMS353590-supplement-SOM_Table_IV.pdf]

| Clone ID    | P-value  | Dog chromosome location | Association     | Human chromosome location | Gene Symbol   | Gene Description                                  | Human cytogenetic assignment (Entrez) |
|-------------|----------|-------------------------|-----------------|---------------------------|---------------|---------------------------------------------------|---------------------------------------|
| CH82-335P22 | 4.11E-05 | chrX:85500216-85667178  | ↑ gain in PTCLu | chrX:108277972-108556760  |               |                                                   |                                       |
| CH82-335B12 | 1.21E-04 | chr7:47644466-47863226  | ↑ gain in PTCLu | chr18:43975514-44231745   | <i>RNF165</i> | ring finger protein 165                           | 18q21.1                               |
|             |          |                         |                 |                           | <i>LOXHD1</i> | lipoygenase homology domains 1                    | 18q21.1                               |
| CH82-484E08 | 1.21E-04 | chr29:30017710-30207186 | ↑ gain in PTCLu | chr8:80452986-80701280    | <i>STMN2</i>  | stathmin-like 2                                   | 8q21.13                               |
|             |          |                         |                 |                           | <i>HEY1</i>   | hairy/enhancer-of-split related with YRPW motif 1 | 8q21                                  |
| CH82-62K23  | 1.21E-04 | chr29:39904804-40101226 | ↑ gain in PTCLu | chr8:92644487-92917555    |               |                                                   |                                       |

Thomas et al. SOM Table IV
