# Supplementary material
Source: PubMed Central journal article supplement (PMC4304668)
Supplement: NIHMS353590-supplement-SOM_Table_V.pdf [file NIHMS353590-supplement-SOM_Table_V.pdf]

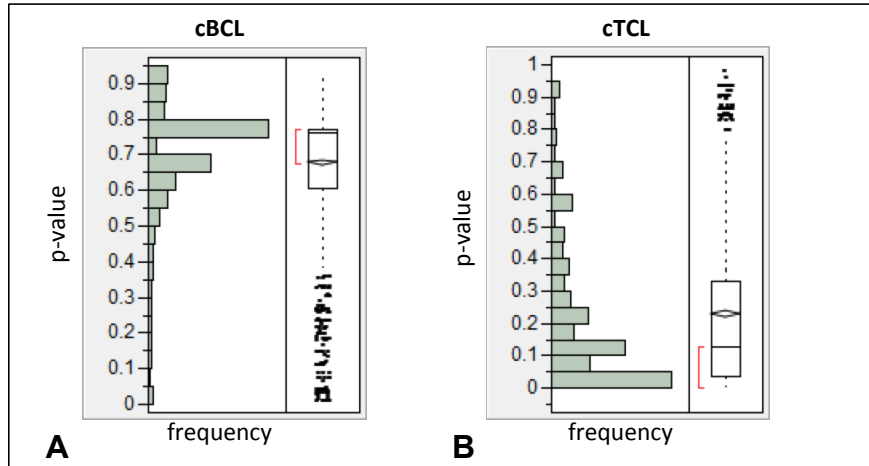

| Clone ID    | P-value  | Dog chromosome location | Association      | Human chromosome location | Gene Symbol         | Gene Description                                              | Human cytogenetic assignment (Entrez) |
|-------------|----------|-------------------------|------------------|---------------------------|---------------------|---------------------------------------------------------------|---------------------------------------|
| CH82-328G09 | 3.15E-06 | chr6:10769537-10958045  | ↑ gain in Boxers | chr7:101765722-102040019  | <i>CUX1</i>         | cut-like homeobox 1                                           | 7q22.1                                |
|             |          |                         |                  |                           | <i>SH2B2</i>        | SH2B adaptor protein 2                                        | 7q22                                  |
|             |          |                         |                  |                           | <i>SPDYE6</i>       | speedy homolog E6 (Xenopus laevis)                            | 7q22.1                                |
|             |          |                         |                  |                           | <i>PRKRIP1</i>      | PRKR interacting protein 1 (IL11 inducible)                   | 7q22.1                                |
| CH82-122K24 | 3.72E-06 | chr6:22926270-23121993  | ↑ gain in Boxers | chr16:26282722-26533560   |                     |                                                               |                                       |
| CH82-313C15 | 8.24E-06 | chr12:39896138-40108358 | ↑ gain in Boxers | chr6:75960778-76188621    | <i>TMEM30A</i>      | transmembrane protein 30A                                     | 6q14.1                                |
|             |          |                         |                  |                           | <i>FILIP1</i>       | filamin A interacting protein 1                               | 6q14.1                                |
| CH82-335E11 | 8.24E-06 | chr20:9093097-9273156   | ↑ gain in Boxers | chr3:12325450-12527804    | <b><i>PPARG</i></b> | <b>peroxisome proliferator-activated receptor gamma</b>       | <b>3p25</b>                           |
|             |          |                         |                  |                           | <i>TSEN2</i>        | tRNA splicing endonuclease 2 homolog ( <i>S. cerevisiae</i> ) | 3p25.2                                |
| CH82-197B21 | 8.24E-06 | chr31:32547604-32755647 | ↑ gain in Boxers | chr21:36433856-36682123   |                     |                                                               |                                       |
| CH82-330O21 | 8.24E-06 | chr31:35133151-35336638 | ↑ gain in Boxers | chr21:39290645-39488665   | <i>DSCR4</i>        | Down syndrome critical region gene 4                          | 21q22.2                               |
| CH82-188N02 | 8.24E-06 | chr31:37676109-37882008 | ↑ gain in Boxers | chr21:42164751-42411140   | <i>DSCAM</i>        | Down syndrome cell adhesion molecule                          | 21q22.2                               |
