# Supplementary material
Source: PubMed Central journal article supplement (PMC4304668)
Supplement: NIHMS353590-supplement-SOM_Table_VI.pdf [file NIHMS353590-supplement-SOM_Table_VI.pdf]

| <b>Region</b> | <b>Chromosome</b> | <b>Band</b> | <b>Region</b>           | <b>Region size (Mb)</b> | <b>Aberration</b> |
|---------------|-------------------|-------------|-------------------------|-------------------------|-------------------|
| <b>1</b>      | 3                 | q12.3-q21.1 | chr3:17672757-24698492  | 7,025,735               | LOSS              |
| <b>2</b>      | 5                 | q35         | chr5:81162548-81445907  | 283,359                 | LOSS              |
| <b>3</b>      | 6                 | q23.1       | chr6:48206995-50193904  | 1,986,909               | LOSS              |
| <b>4</b>      | 8                 | q11.2       | chr8:5657928-5877259    | 219,331                 | LOSS              |
| <b>5</b>      | 8                 | q33.3       | chr8:76009130-77158401  | 1,149,271               | LOSS              |
| <b>6</b>      | 9                 | q12         | chr9:11670494-11694552  | 24,058                  | LOSS              |
| <b>7</b>      | 9                 | q12         | chr9:13463886-13495389  | 31,503                  | LOSS              |
| <b>8</b>      | 9                 | q14         | chr9:20022538-20436156  | 413,618                 | GAIN              |
| <b>9</b>      | 9                 | q14         | chr9:20447061-20924182  | 477,121                 | LOSS              |
| <b>10</b>     | 9                 | q14         | chr9:21292889-21551293  | 258,404                 | LOSS              |
| <b>11</b>     | 13                | q11-q22.2   | chr13:3033844-65990442  | 62,956,598              | GAIN              |
| <b>12</b>     | 14                | q12         | chr14:3906548-5881151   | 1,974,603               | LOSS              |
| <b>13</b>     | 14                | q12         | chr14:12157181-13305432 | 1,148,251               | LOSS              |
| <b>14</b>     | 14                | q22         | chr14:52067200-56538658 | 4,471,458               | LOSS              |
| <b>15</b>     | 16                | q25.2       | chr16:61900190-61962719 | 62,529                  | LOSS              |
| <b>16</b>     | 17                | q16         | chr17:40646529-40861402 | 214,873                 | LOSS              |
| <b>17</b>     | 17                | q23         | chr17:59755784-59870781 | 114,997                 | LOSS              |
| <b>18</b>     | 20                | q15.3       | chr20:43107000-45135394 | 2,028,394               | LOSS              |
| <b>19</b>     | 23                | q21.1       | chr23:23557763-23744177 | 186,414                 | LOSS              |
| <b>20</b>     | 26                | q24         | chr26:28548887-30696229 | 2,147,342               | LOSS              |
| <b>21</b>     | 27                | q12         | chr27:17470744-17494217 | 23,473                  | GAIN              |
| <b>22</b>     | 31                | q11-q15.2   | chr31:3119408-42189743  | 39,070,335              | GAIN              |

**Thomas et al. SOM Table IV**
