# Supplementary material
Source: PubMed Central journal article supplement (PMC4304668)

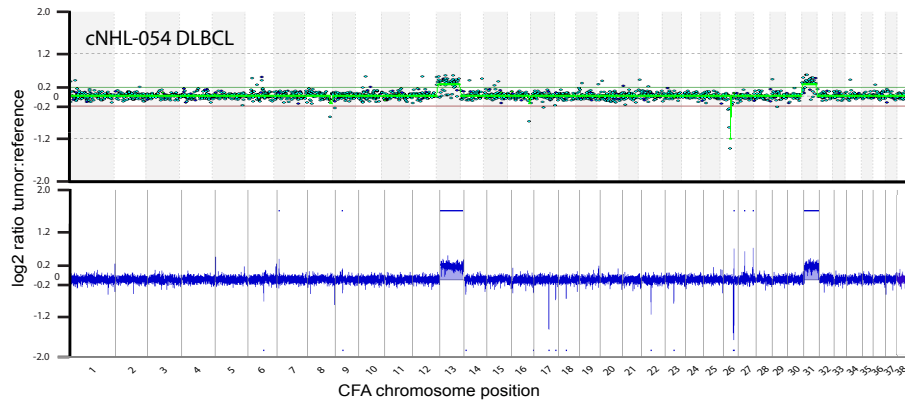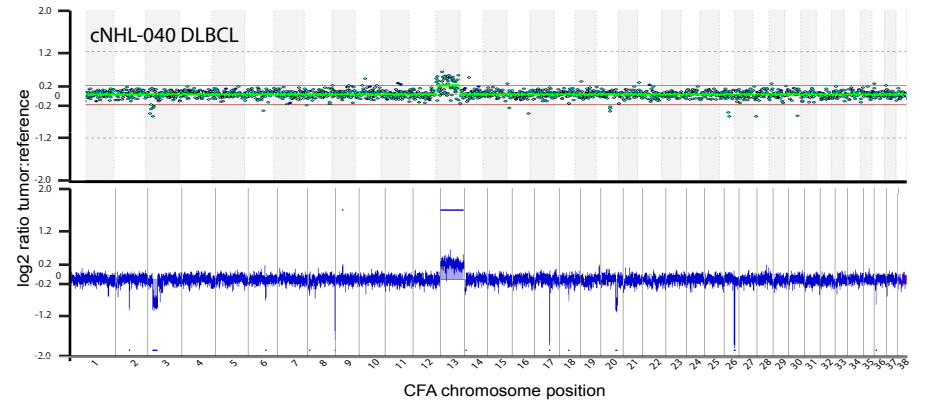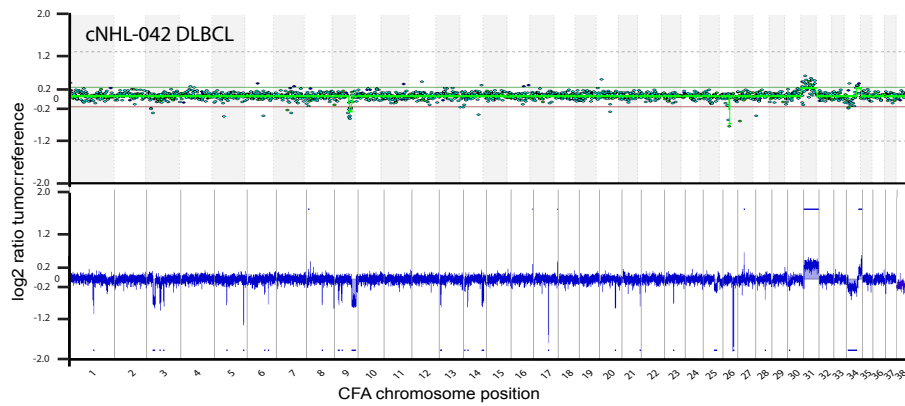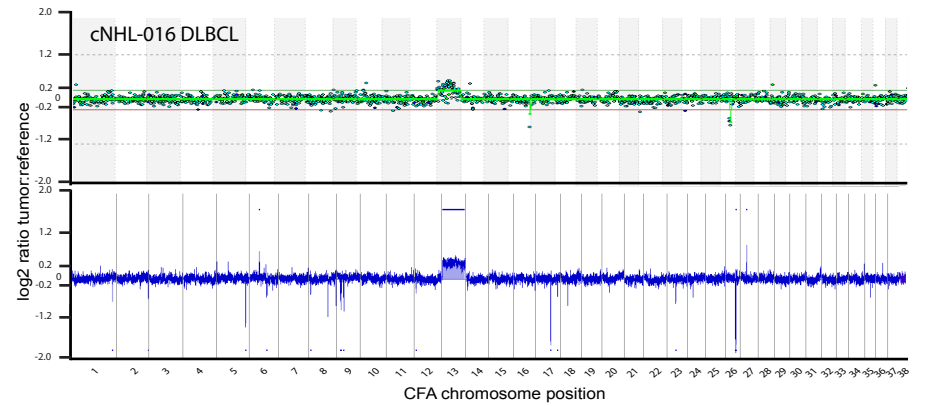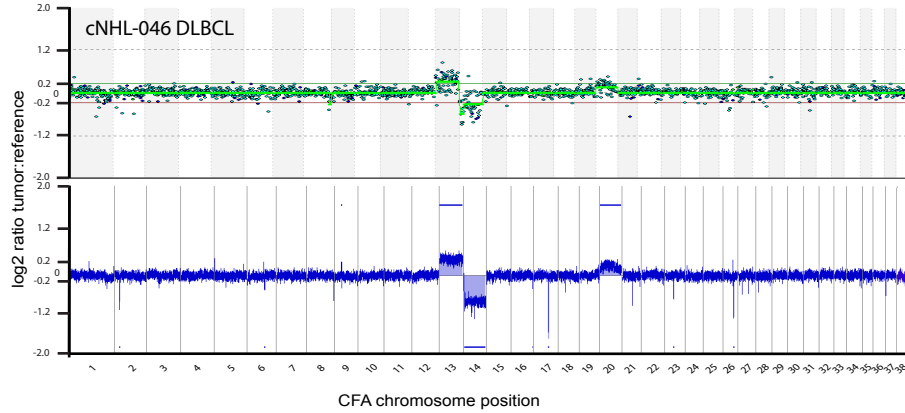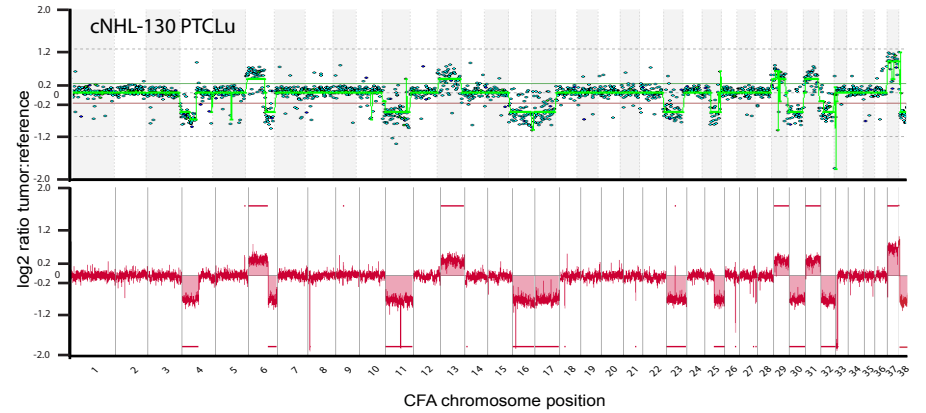

Supplement: NIHMS353590-supplement-SOM_Figure_1.pdf [file NIHMS353590-supplement-SOM_Figure_1.pdf]

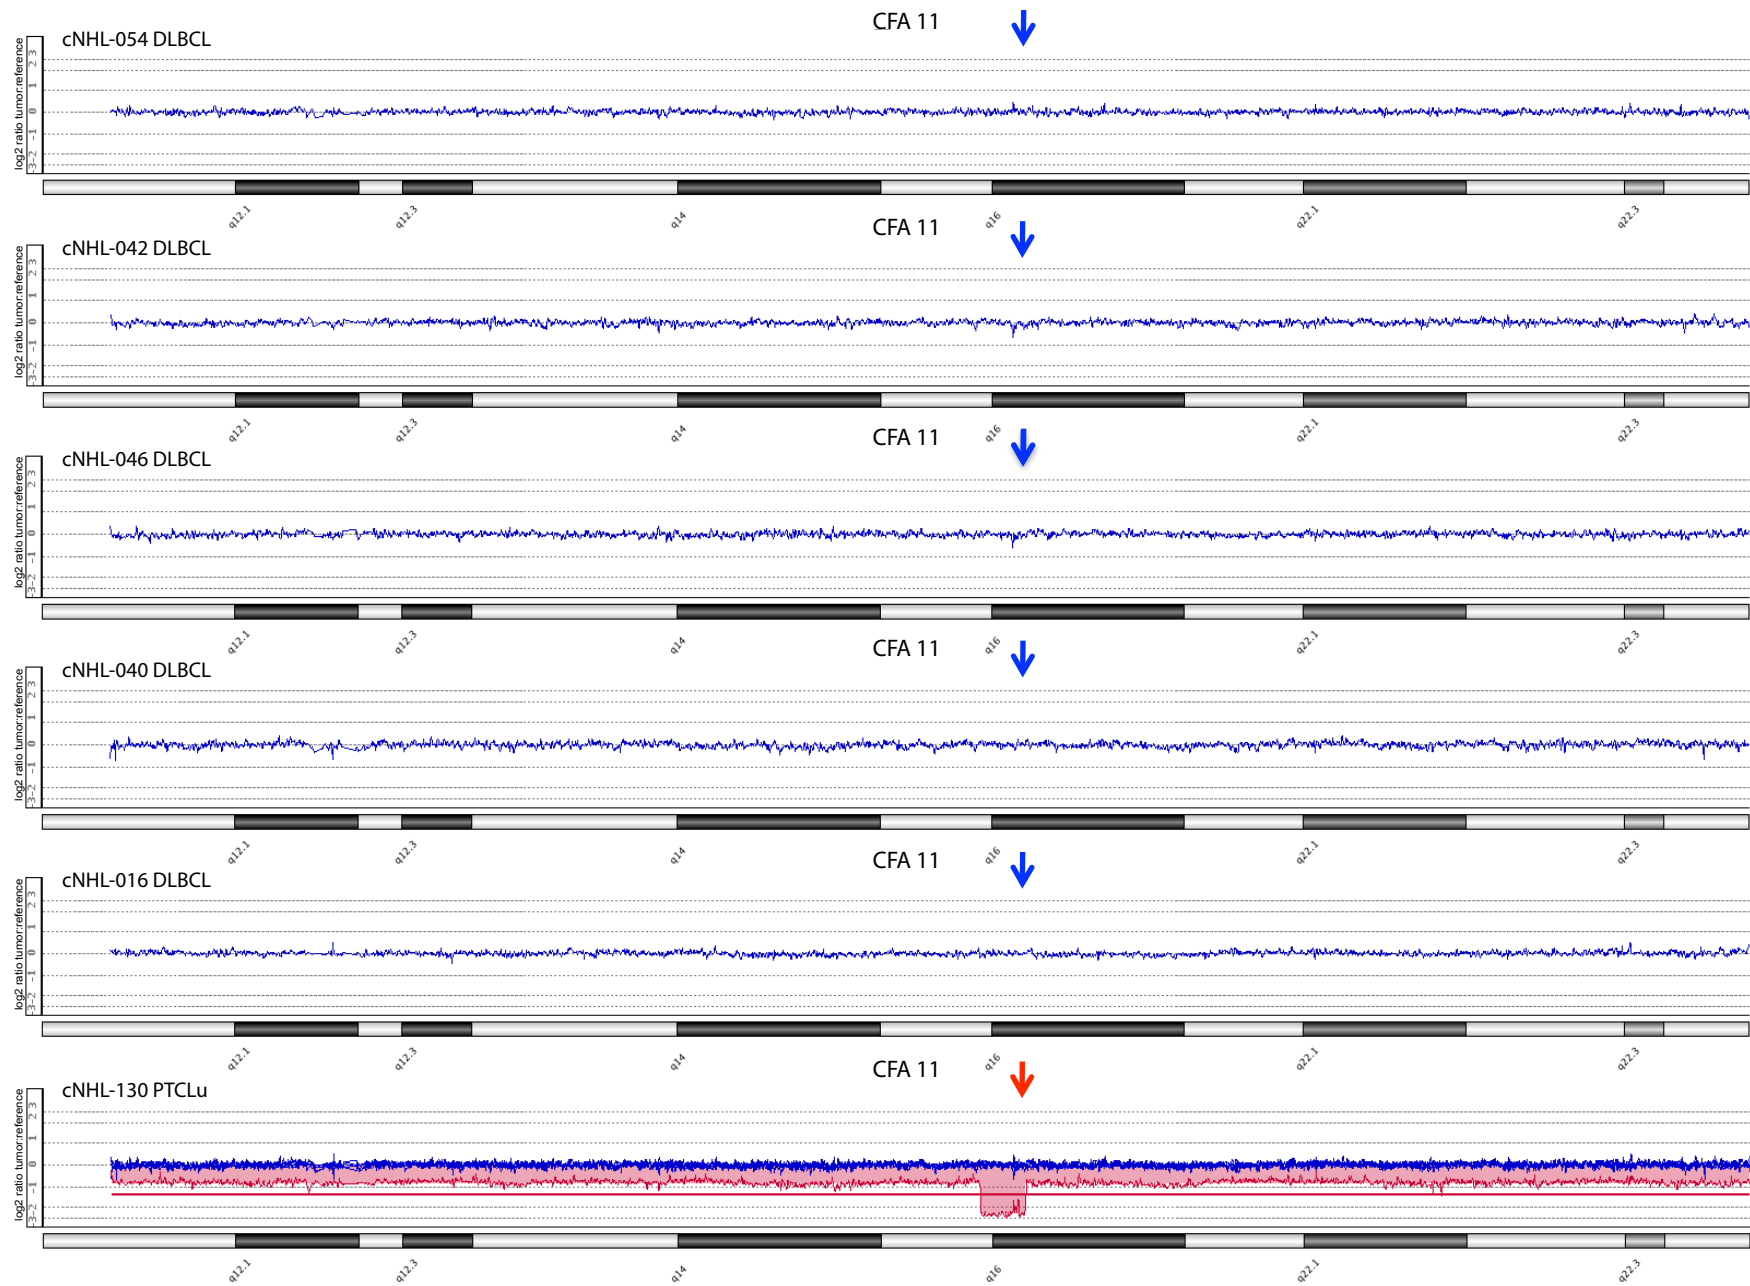

Supplement: NIHMS353590-supplement-SOM_Figure_2.pdf [file NIHMS353590-supplement-SOM_Figure_2.pdf]
